# Supplementary material for: Finding Children with High Risk of Non-Vaccination in 92 Low- and Middle-Income Countries: A Decision Tree Approach
Source: MDPI journal article supplement (doi:10.3390/vaccines9060646), 2021-06-13
Supplement: s1 [file s1]

## Supplementary materials

### Section A

In order to take into consideration the number of children aged 12-23 months living in each country, individual sample weights were adjusted using the following equation:

$$w_{ij,adj} = \left( \frac{w_{ij}}{\sum_i w_{ij}} \right) \left( \frac{pop_j}{\sum_j pop_j} \right) N$$

where:

$i$  indicates a child and  $j$  a country

$w_{ij,adj}$  is the adjusted individual sample weight

$w_{ij}$  is the original sample weight

$pop_j$  is the population of children aged 12-23 months in the country  $j$

$N$  is the total number of children in the sample

### Section B

**Table S1.** – National zero-dose prevalence and confidence interval.

| Country                   | Year | Source | Zero dose prevalence | CI 95%         |
|---------------------------|------|--------|----------------------|----------------|
| Afghanistan               | 2015 | DHS    | 13.1%                | (11.4 - 15.0%) |
| Algeria                   | 2012 | MICS   | 1.6%                 | (1.0 - 2.4%)   |
| Angola                    | 2015 | DHS    | 19.8%                | (17.7 - 22.1%) |
| Armenia                   | 2015 | DHS    | 0.6%                 | (0.2 - 1.7%)   |
| Bangladesh                | 2014 | DHS    | 2.0%                 | (1.4 - 2.9%)   |
| Belize                    | 2015 | MICS   | 1.6%                 | (0.5 - 4.9%)   |
| Benin                     | 2017 | DHS    | 11.0%                | (9.3 - 12.8%)  |
| Bosnia and Herzegovina    | 2011 | MICS   | 0.3%                 | (0.1 - 1.3%)   |
| Burkina Faso              | 2010 | DHS    | 1.8%                 | (1.2 - 2.7%)   |
| Burundi                   | 2016 | DHS    | 0.3%                 | (0.2 - 0.7%)   |
| Cambodia                  | 2014 | DHS    | 2.4%                 | (1.6 - 3.6%)   |
| Cameroon                  | 2014 | MICS   | 3.9%                 | (2.8 - 5.3%)   |
| CAR                       | 2010 | MICS   | 9.3%                 | (7.8 - 11.1%)  |
| Chad                      | 2014 | DHS    | 18.5%                | (16.5 - 20.7%) |
| Colombia                  | 2010 | DHS    | 1.7%                 | (1.2 - 2.4%)   |
| Comoros                   | 2012 | DHS    | 10.7%                | (8.2 - 13.8%)  |
| Congo Brazzaville         | 2014 | MICS   | 6.3%                 | (5.0 - 7.9%)   |
| Congo Democratic Republic | 2017 | MICS   | 20.5%                | (17.9 - 23.3%) |
| Costa Rica                | 2011 | MICS   | 0.1%                 | (0.0 - 0.8%)   |
| Côte d'Ivoire             | 2016 | MICS   | 11.9%                | (9.9 - 14.2%)  |
| Cuba                      | 2014 | MICS   | 0.3%                 | (0.1 - 0.7%)   |
| Dominican Republic        | 2014 | MICS   | 4.0%                 | (3.2 - 5.1%)   |
| Egypt                     | 2014 | DHS    | 0.0%                 | (0.0 - 0.2%)   |
| El Salvador               | 2014 | MICS   | 0.4%                 | (0.1 - 1.9%)   |
| Eswatini                  | 2014 | MICS   | 1.6%                 | (0.8 - 3.4%)   |
| Ethiopia                  | 2016 | DHS    | 16.2%                | (13.5 - 19.3%) |
| Gabon                     | 2012 | DHS    | 4.8%                 | (3.3 - 6.9%)   |
| Gambia                    | 2018 | MICS   | 1.5%                 | (1.0 - 2.3%)   |
| Ghana                     | 2017 | MICS   | 3.2%                 | (2.1 - 5.0%)   |

| Country               | Year | Source | Zero dose prevalence | CI 95%         |
|-----------------------|------|--------|----------------------|----------------|
| Guatemala             | 2014 | DHS    | 0.6%                 | (0.3 - 1.1%)   |
| Guinea                | 2018 | DHS    | 23.0%                | (19.8 - 26.4%) |
| Guinea Bissau         | 2014 | MICS   | 3.3%                 | (2.4 - 4.5%)   |
| Guyana                | 2014 | MICS   | 2.8%                 | (1.5 - 5.3%)   |
| Haiti                 | 2016 | DHS    | 9.8%                 | (7.5 - 12.5%)  |
| Honduras              | 2011 | DHS    | 0.4%                 | (0.2 - 1.0%)   |
| India                 | 2015 | DHS    | 6.1%                 | (5.7 - 6.4%)   |
| Indonesia             | 2017 | DHS    | 7.0%                 | (5.9 - 8.1%)   |
| Iraq                  | 2018 | MICS   | 3.0%                 | (2.4 - 3.9%)   |
| Jamaica               | 2011 | MICS   | 0.5%                 | (0.1 - 2.0%)   |
| Jordan                | 2017 | DHS    | 6.9%                 | (5.2 - 9.1%)   |
| Kazakhstan            | 2015 | MICS   | 1.6%                 | (1.0 - 2.6%)   |
| Kenya                 | 2014 | DHS    | 1.7%                 | (1.2 - 2.5%)   |
| Kiribati              | 2018 | MICS   | 38.2%                | (33.4 - 43.4%) |
| Kosovo                | 2013 | MICS   | 1.0%                 | (0.3 - 3.0%)   |
| Kyrgyzstan            | 2018 | MICS   | 2.4%                 | (1.2 - 4.6%)   |
| Laos                  | 2017 | MICS   | 13.0%                | (11.3 - 14.9%) |
| Lesotho               | 2018 | MICS   | 2.5%                 | (1.3 - 4.6%)   |
| Liberia               | 2013 | DHS    | 1.7%                 | (1.0 - 2.7%)   |
| Madagascar            | 2018 | MICS   | 18.7%                | (16.6 - 21.0%) |
| Malawi                | 2015 | DHS    | 1.6%                 | (1.1 - 2.3%)   |
| Maldives              | 2016 | DHS    | 8.1%                 | (5.7 - 11.5%)  |
| Mali                  | 2018 | DHS    | 14.5%                | (11.9 - 17.4%) |
| Mauritania            | 2015 | MICS   | 9.7%                 | (7.8 - 11.9%)  |
| Mexico                | 2015 | MICS   | 5.6%                 | (3.7 - 8.3%)   |
| Moldova               | 2012 | MICS   | 0.0%                 | -              |
| Mongolia              | 2018 | MICS   | 1.3%                 | (0.7 - 2.4%)   |
| Montenegro            | 2013 | MICS   | 1.4%                 | (0.4 - 5.5%)   |
| Mozambique            | 2015 | DHS    | 5.1%                 | (3.2 - 8.0%)   |
| Myanmar               | 2015 | DHS    | 7.9%                 | (5.4 - 11.3%)  |
| Namibia               | 2013 | DHS    | 4.4%                 | (2.9 - 6.7%)   |
| Nepal                 | 2016 | DHS    | 0.8%                 | (0.4 - 1.8%)   |
| Niger                 | 2012 | DHS    | 4.4%                 | (3.4 - 5.6%)   |
| Nigeria               | 2018 | DHS    | 19.5%                | (17.9 - 21.3%) |
| North Macedonia       | 2011 | MICS   | 2.1%                 | (0.8 - 5.4%)   |
| Pakistan              | 2017 | DHS    | 3.7%                 | (2.6 - 5.3%)   |
| Panama                | 2013 | MICS   | 1.6%                 | (0.8 - 3.1%)   |
| Papua New Guinea      | 2016 | DHS    | 24.2%                | (20.9 - 27.9%) |
| Paraguay              | 2016 | MICS   | 2.6%                 | (1.7 - 3.9%)   |
| Peru                  | 2018 | DHS    | 1.1%                 | (0.7 - 1.6%)   |
| Philippines           | 2017 | DHS    | 9.5%                 | (7.9 - 11.4%)  |
| Rwanda                | 2014 | DHS    | 0.7%                 | (0.4 - 1.3%)   |
| São Tomé and Príncipe | 2014 | MICS   | 1.9%                 | (0.9 - 4.0%)   |
| Senegal               | 2018 | DHS    | 2.4%                 | (1.5 - 3.8%)   |
| Serbia                | 2014 | MICS   | 0.6%                 | (0.2 - 1.8%)   |
| Sierra Leone          | 2017 | MICS   | 2.7%                 | (1.9 - 3.7%)   |
| South Africa          | 2016 | DHS    | 5.3%                 | (3.4 - 8.0%)   |
| South Sudan           | 2010 | MICS   | 57.6%                | (54.1 - 61.0%) |
| State of Palestine    | 2014 | MICS   | 0.1%                 | (0.0 - 0.5%)   |

| Country      | Year | Source | Zero dose prevalence | CI 95%         |
|--------------|------|--------|----------------------|----------------|
| Sudan        | 2014 | MICS   | 12.0%                | (10.0 - 14.4%) |
| Tajikistan   | 2017 | DHS    | 3.5%                 | (2.6 - 4.7%)   |
| Tanzania     | 2015 | DHS    | 2.3%                 | (1.6 - 3.4%)   |
| Thailand     | 2015 | MICS   | 3.3%                 | (1.9 - 5.7%)   |
| Timor-Leste  | 2016 | DHS    | 19.2%                | (16.7 - 22.0%) |
| Togo         | 2017 | MICS   | 4.6%                 | (3.2 - 6.7%)   |
| Tunisia      | 2018 | MICS   | 0.3%                 | (0.1 - 1.3%)   |
| Turkmenistan | 2015 | MICS   | 0.1%                 | (0.0 - 0.9%)   |
| Uganda       | 2016 | DHS    | 1.5%                 | (1.0 - 2.1%)   |
| Ukraine      | 2012 | MICS   | 3.4%                 | (2.2 - 5.2%)   |
| Vietnam      | 2013 | MICS   | 1.5%                 | (0.9 - 2.7%)   |
| Yemen        | 2013 | DHS    | 16.3%                | (14.6 - 18.1%) |
| Zambia       | 2018 | DHS    | 1.3%                 | (0.8 - 2.1%)   |
| Zimbabwe     | 2019 | MICS   | 5.1%                 | (3.6 - 7.2%)   |

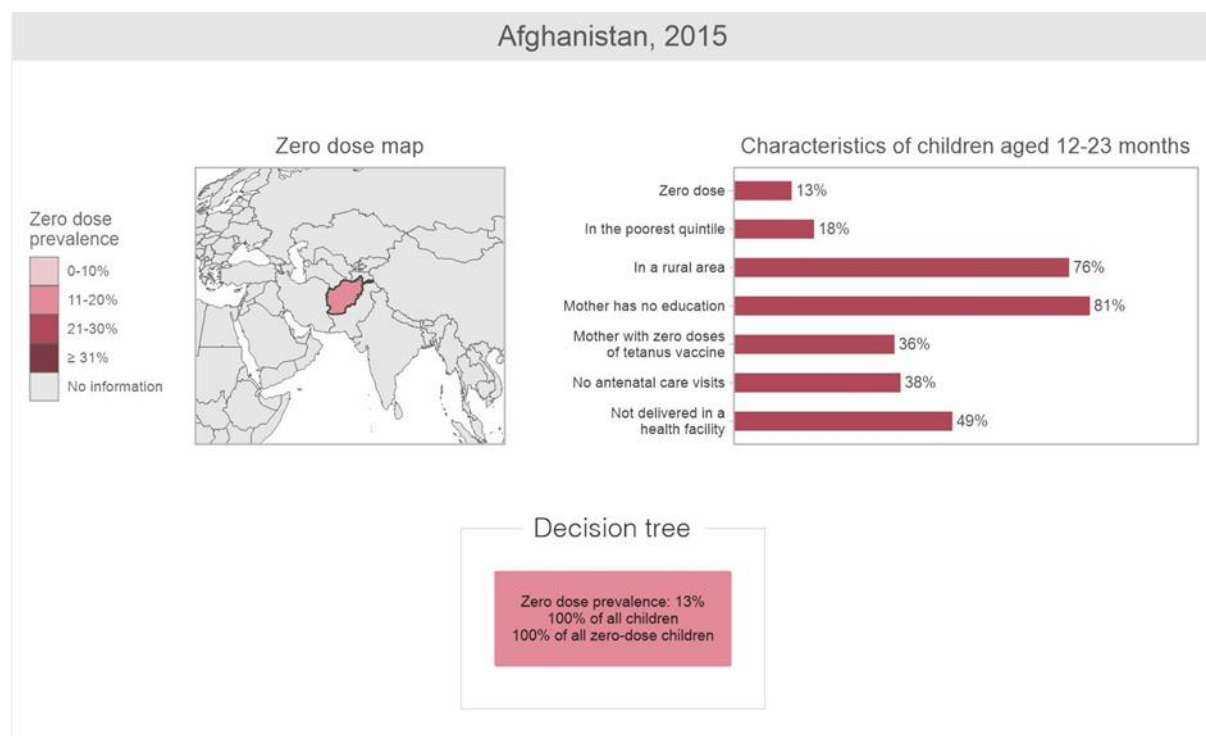

**Figure S1.** – Afghanistan’s country profile.

## Algeria, 2012

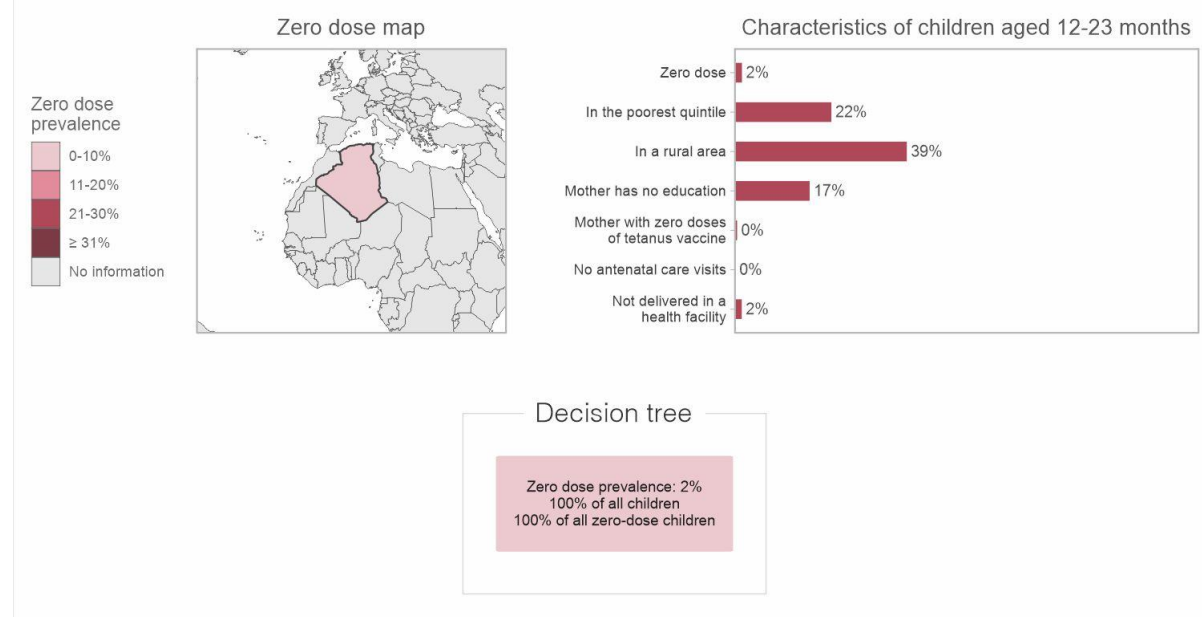

Figure S2. – Algeria's country profile.



## Angola, 2015

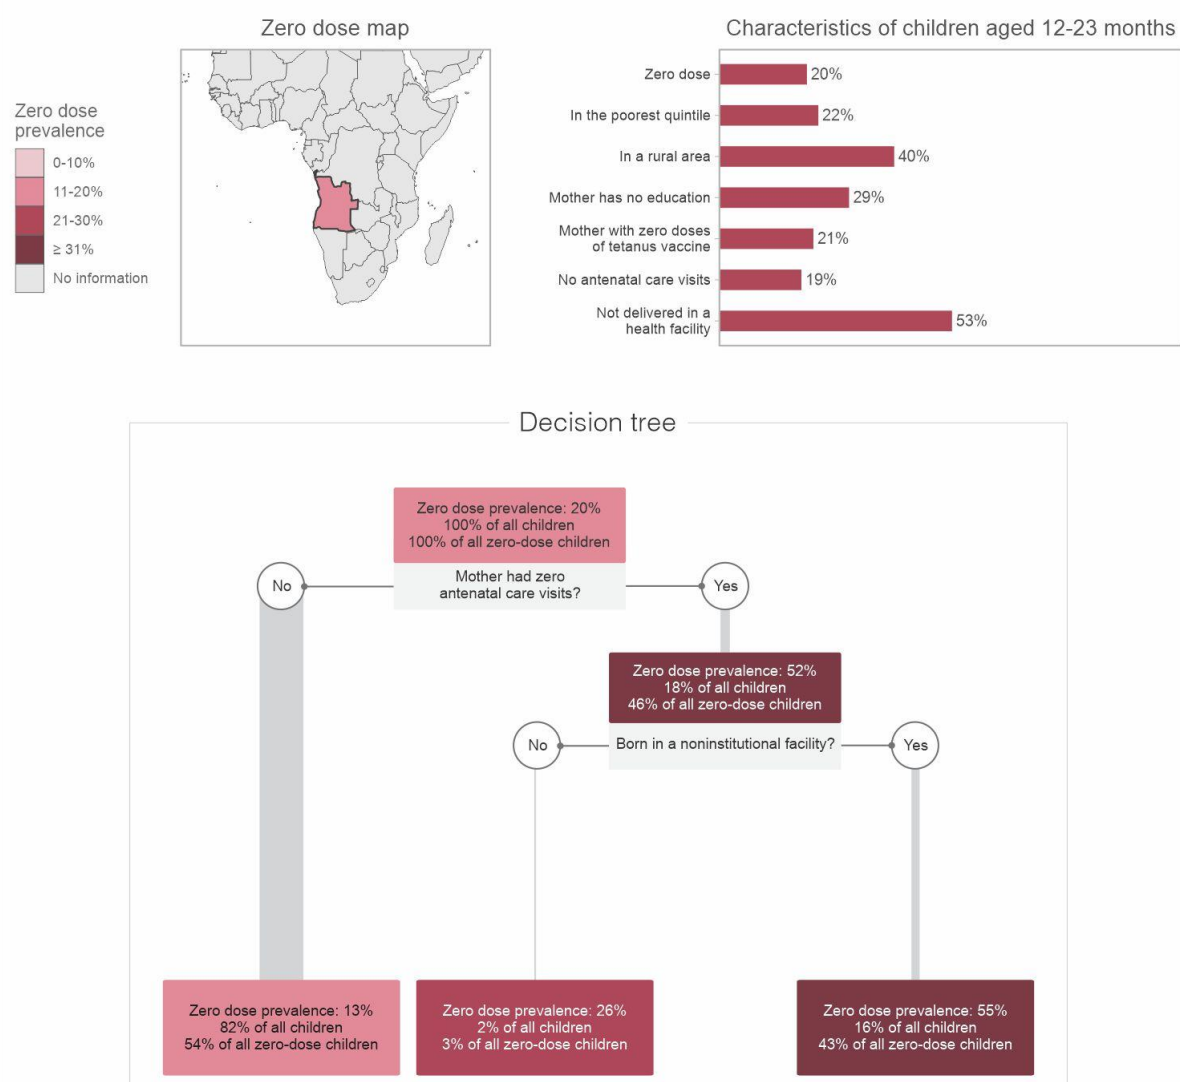

**Figure S3. – Angola's country profile.**

## Armenia, 2015

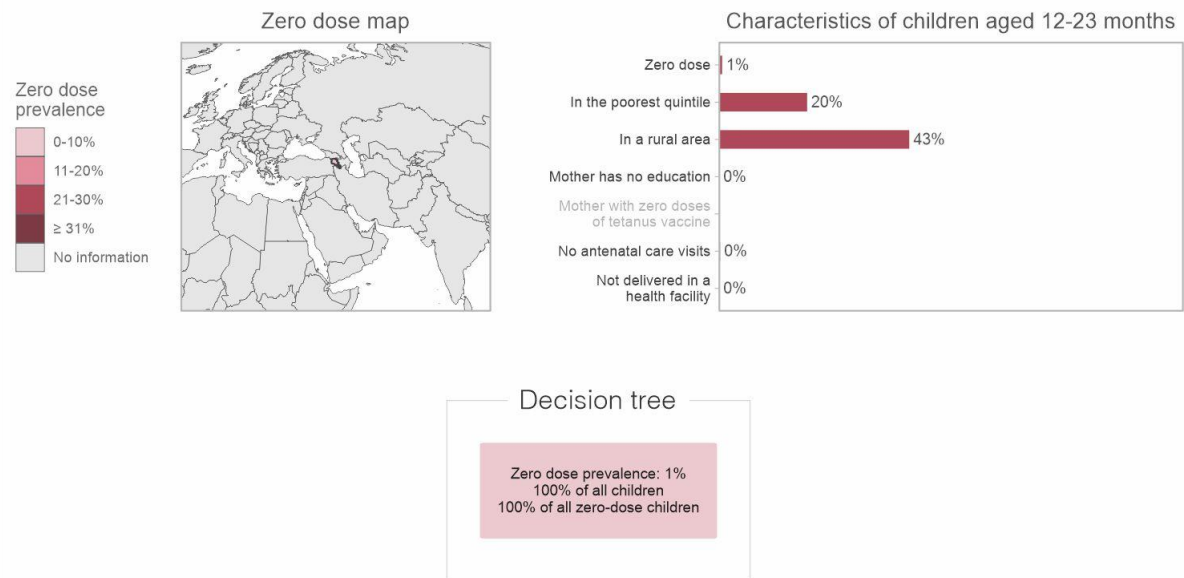

**Figure S4.** – Armenia’s country profile.

## Bangladesh, 2014

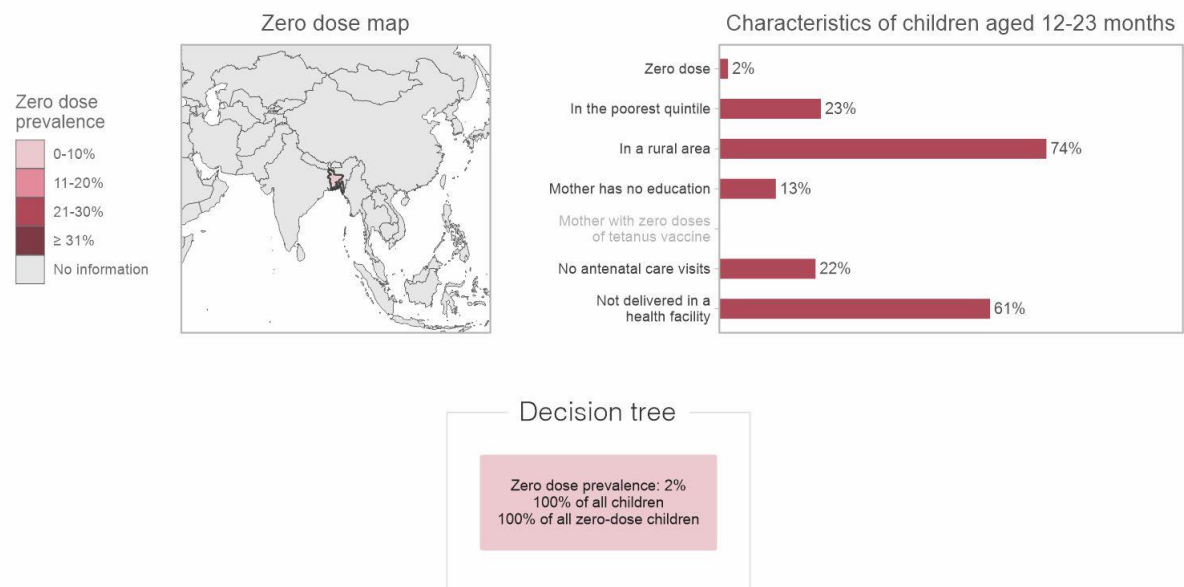

**Figure S5.** – Bangladesh’s country profile.

## Belize, 2015

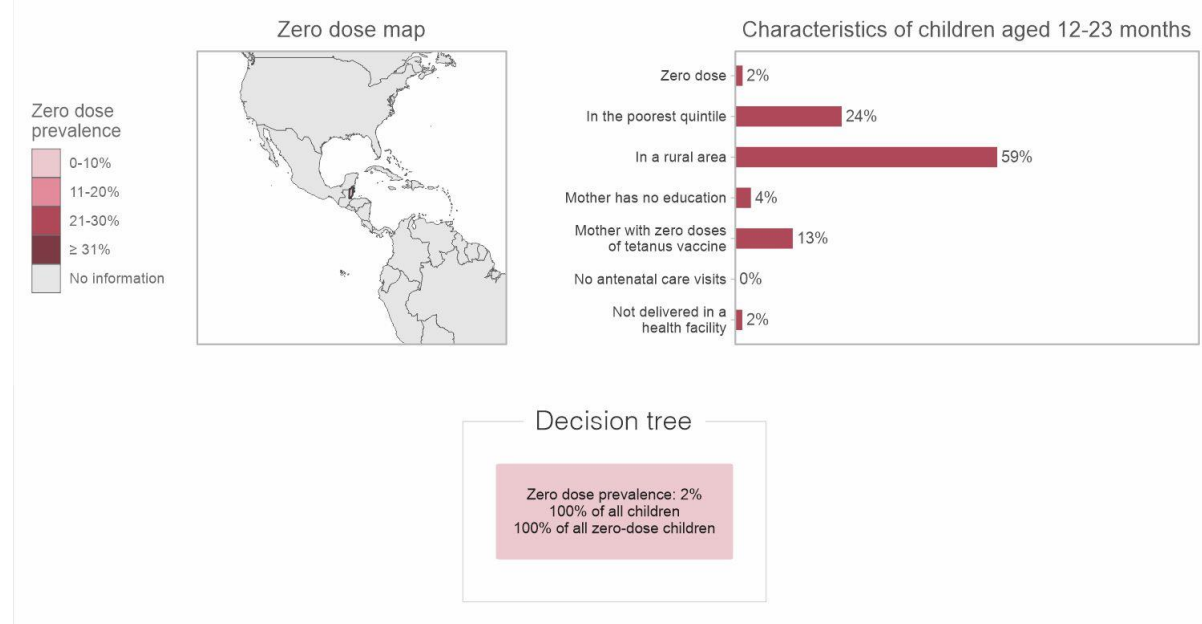

**Figure S6.** – Belize's country profile.

## Benin, 2017

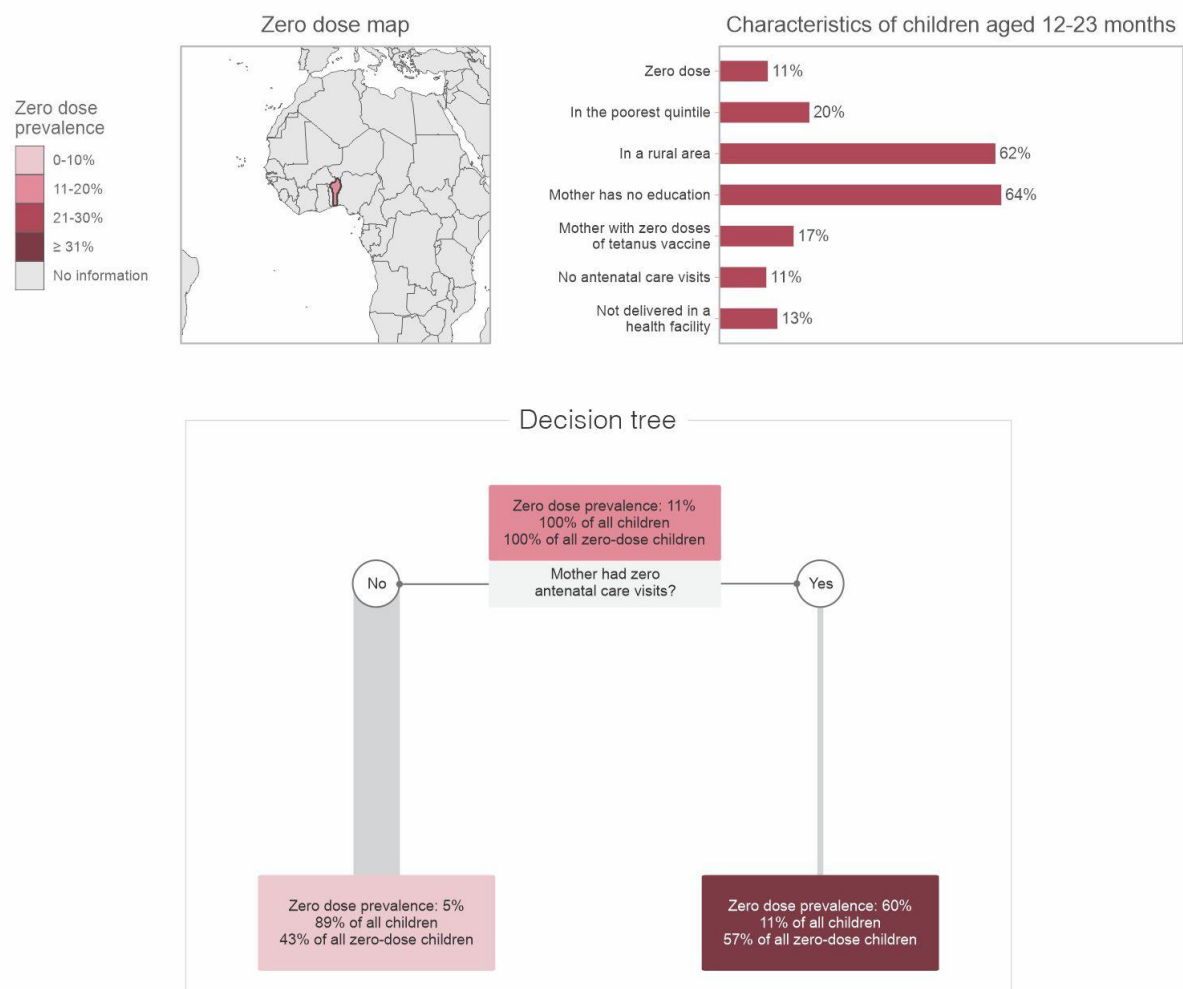

**Figure S7.** – Benin’s country profile.

## Bosnia and Herzegovina, 2011

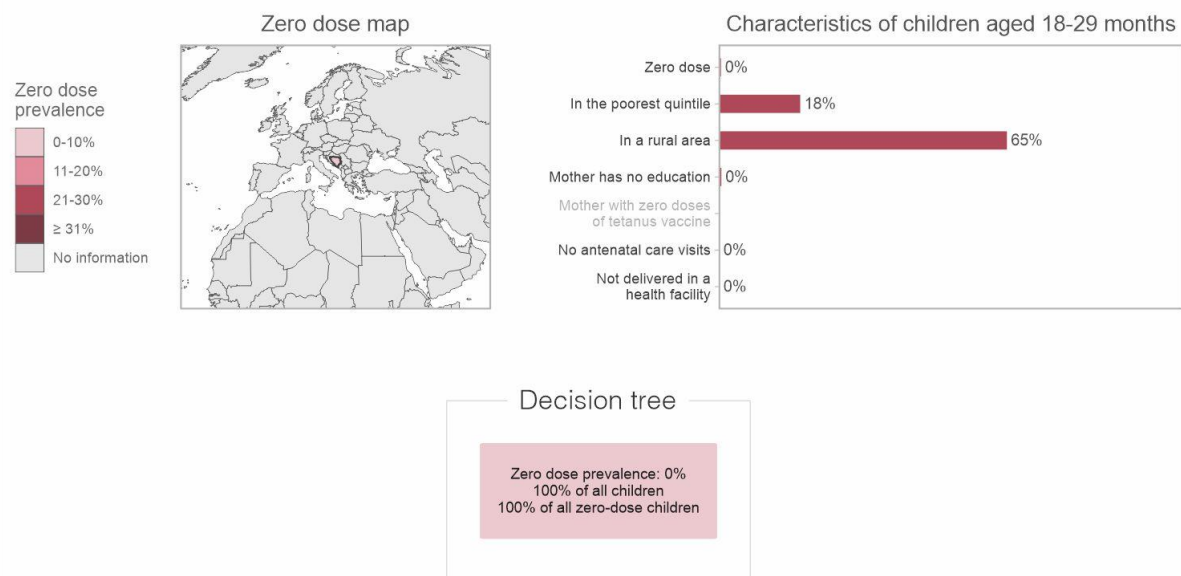

**Figure S8.** – Bosnia and Herzegovina’s country profile.

## Burkina Faso, 2010

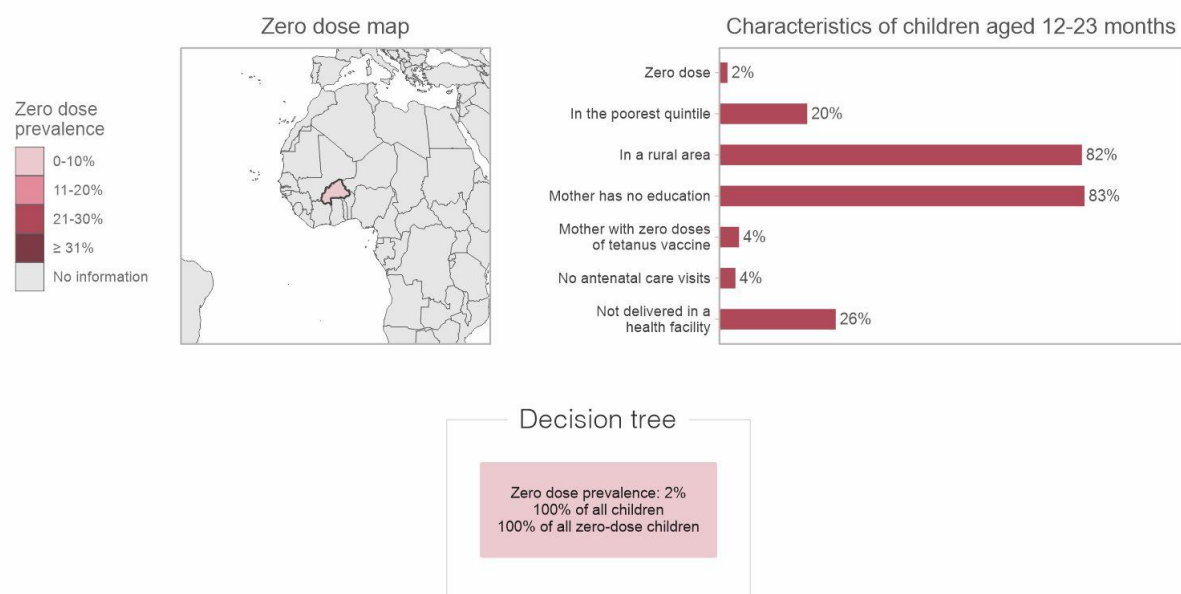

**Figure S9.** – Burkina Faso’s country profile.

## Burundi, 2016

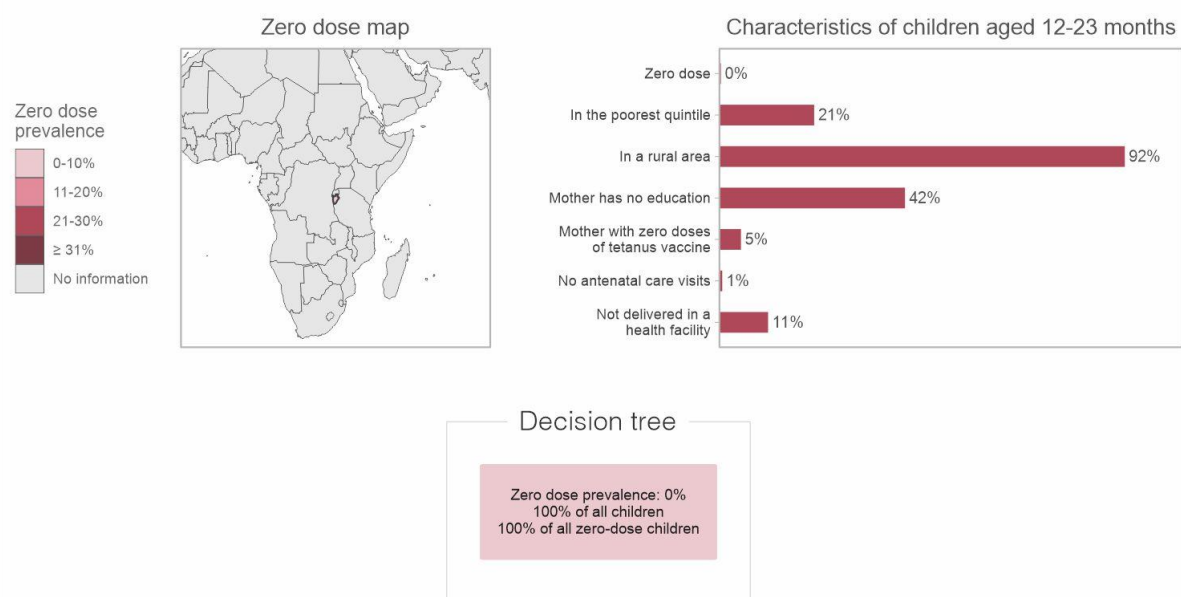

**Figure S10.** – Burundi’s country profile.

## Cambodia, 2014

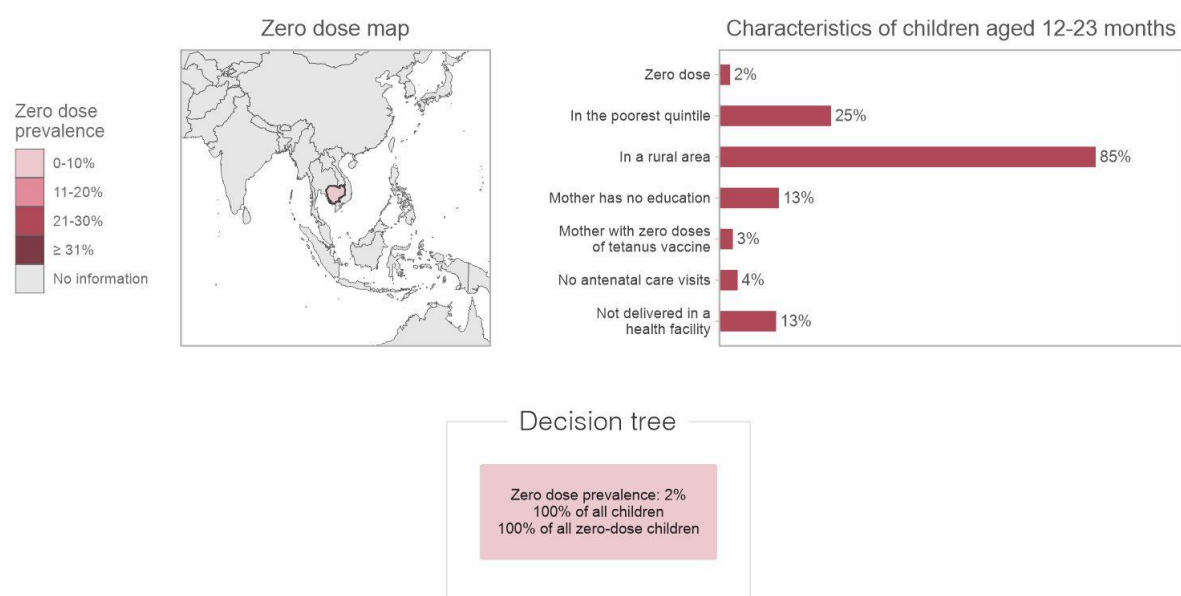

**Figure S11.** – Cambodia’s country profile.

## Cameroon, 2014

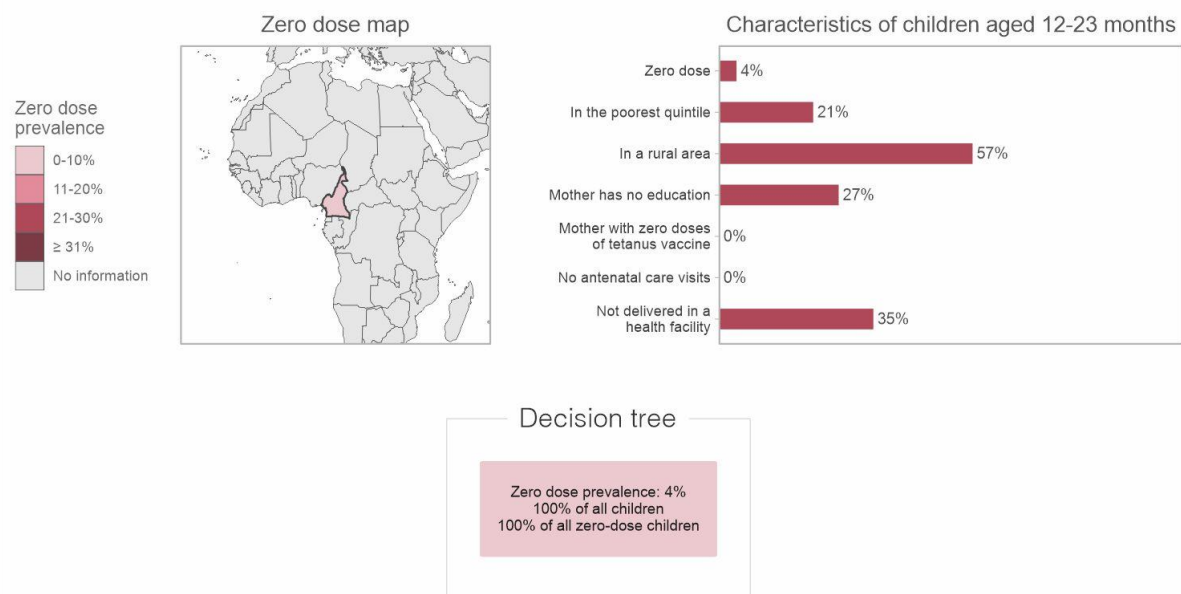

**Figure S12.** – Cameroon’s country profile.

## CAR, 2010

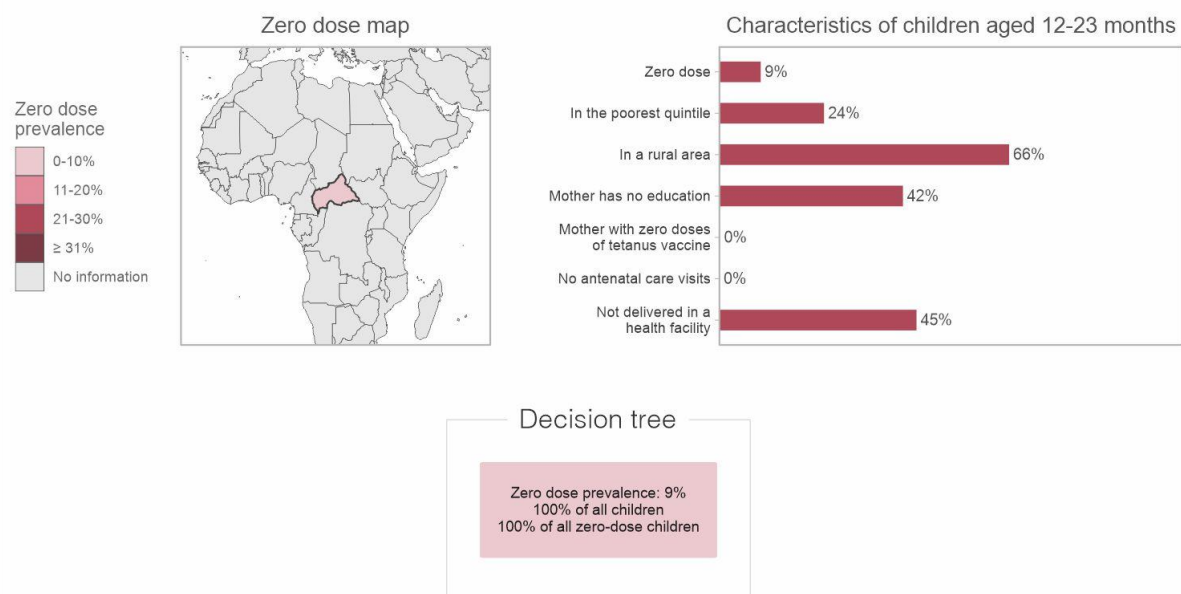

**Figure S13.** – Central African Republic’s country profile.

## Chad, 2014

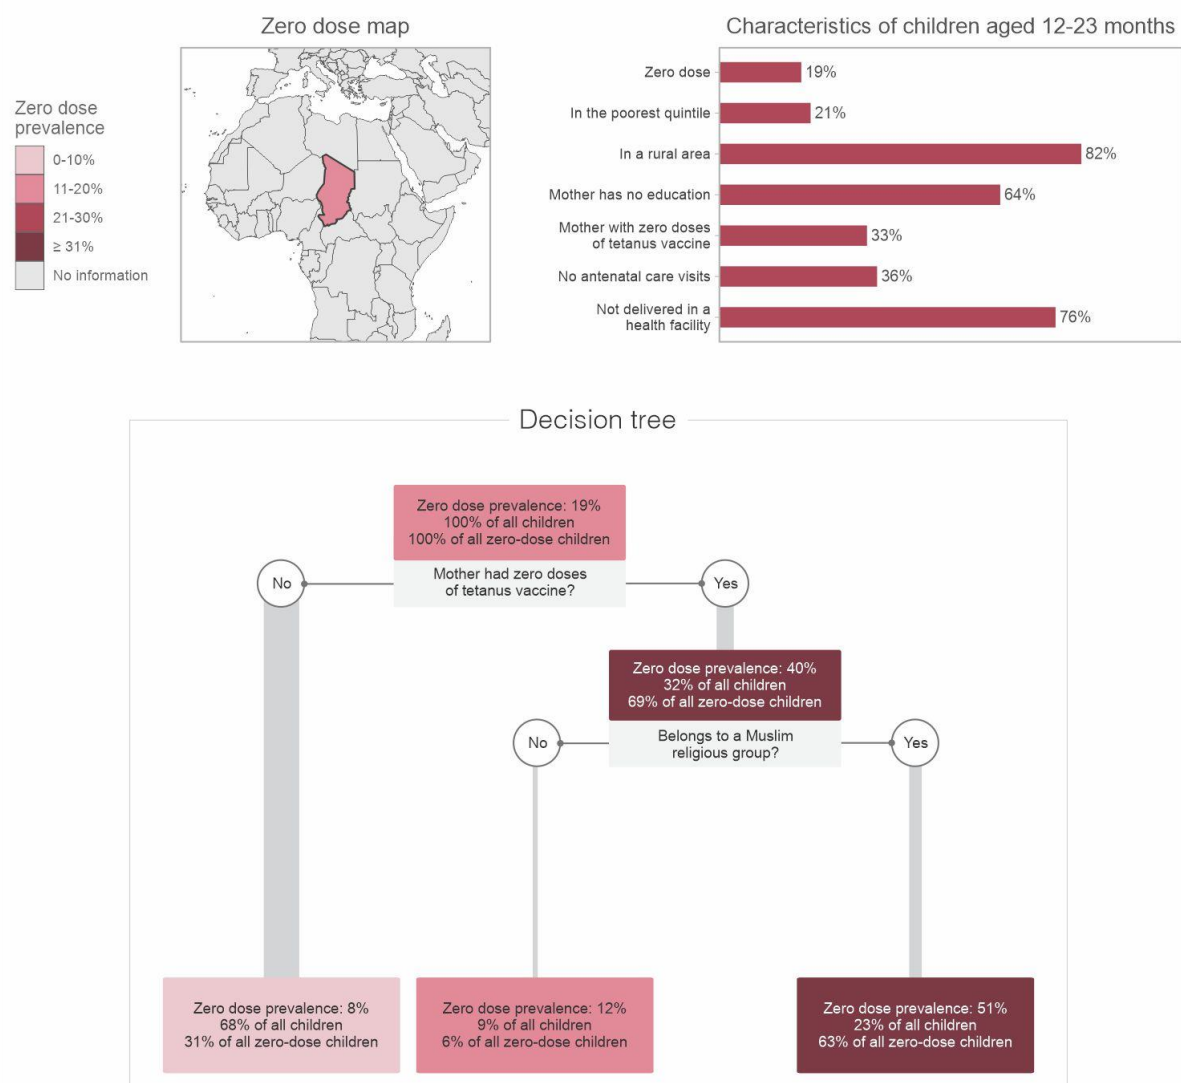

**Figure S14.** – Chad’s country profile.



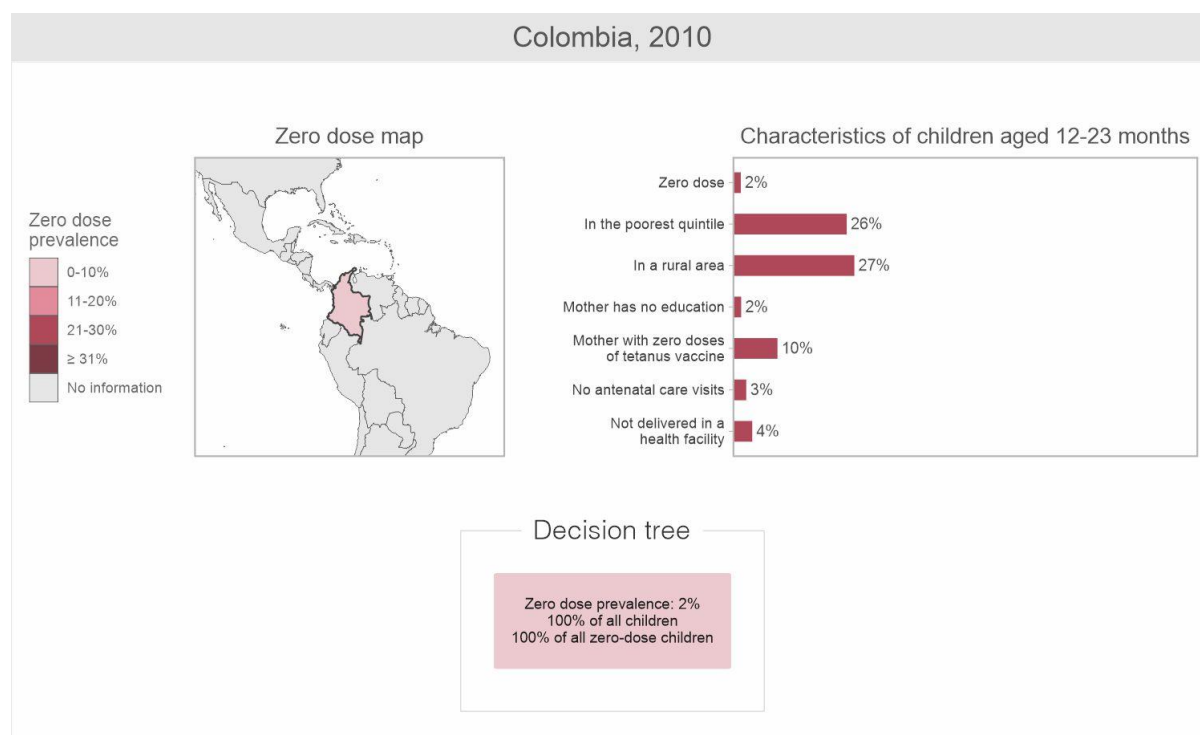

**Figure S15. – Colombia’s country profile.**

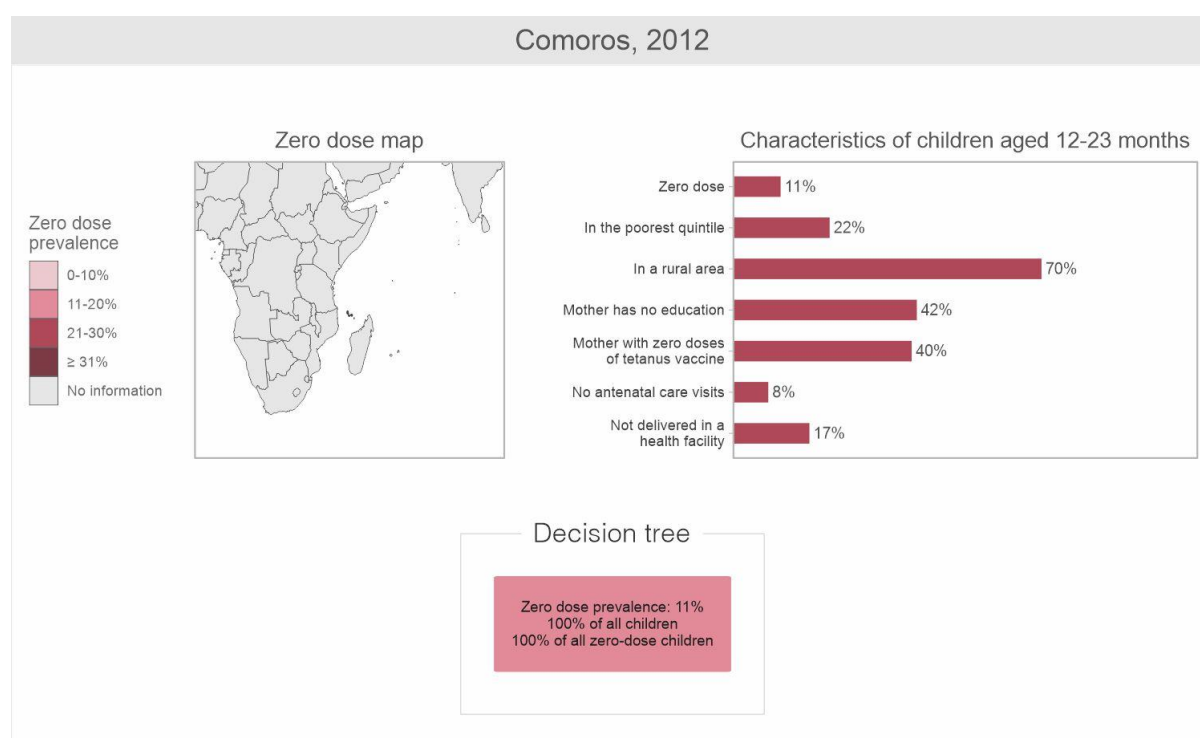

**Figure S16. – Comoro’s country profile.**

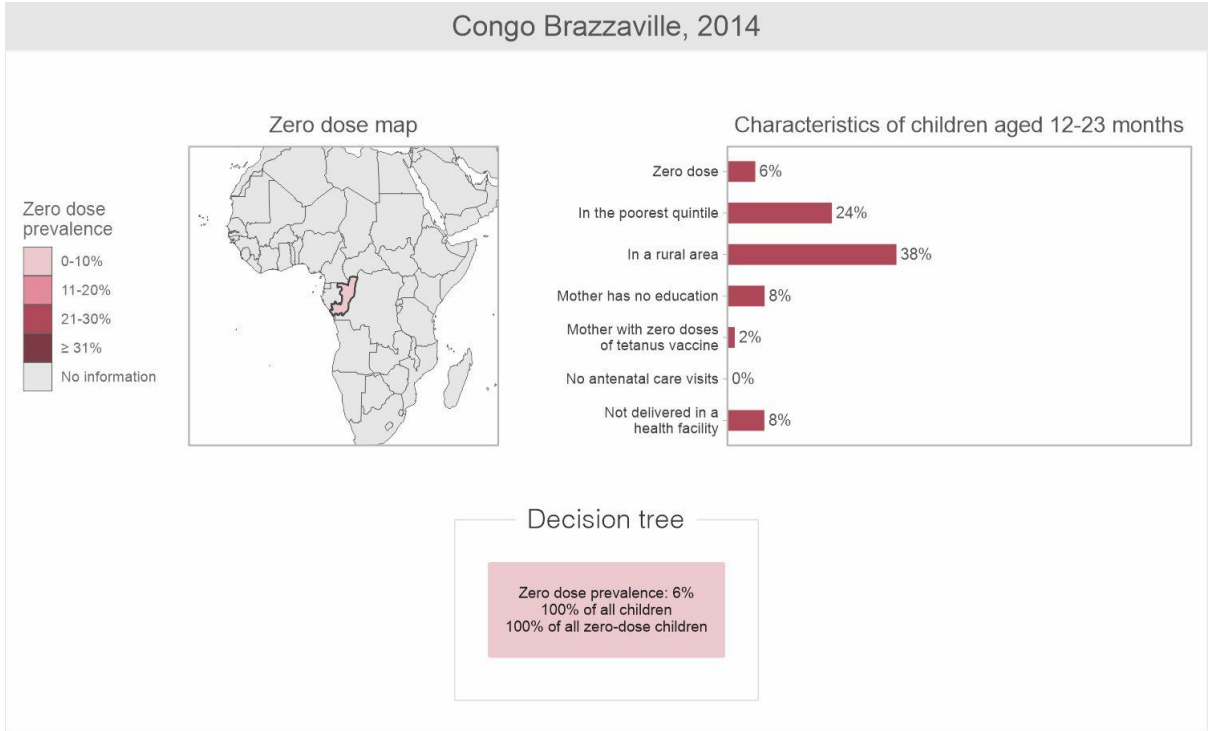

**Figure S17.** – Congo Brazzaville’s country profile.

## Congo, DR, 2017

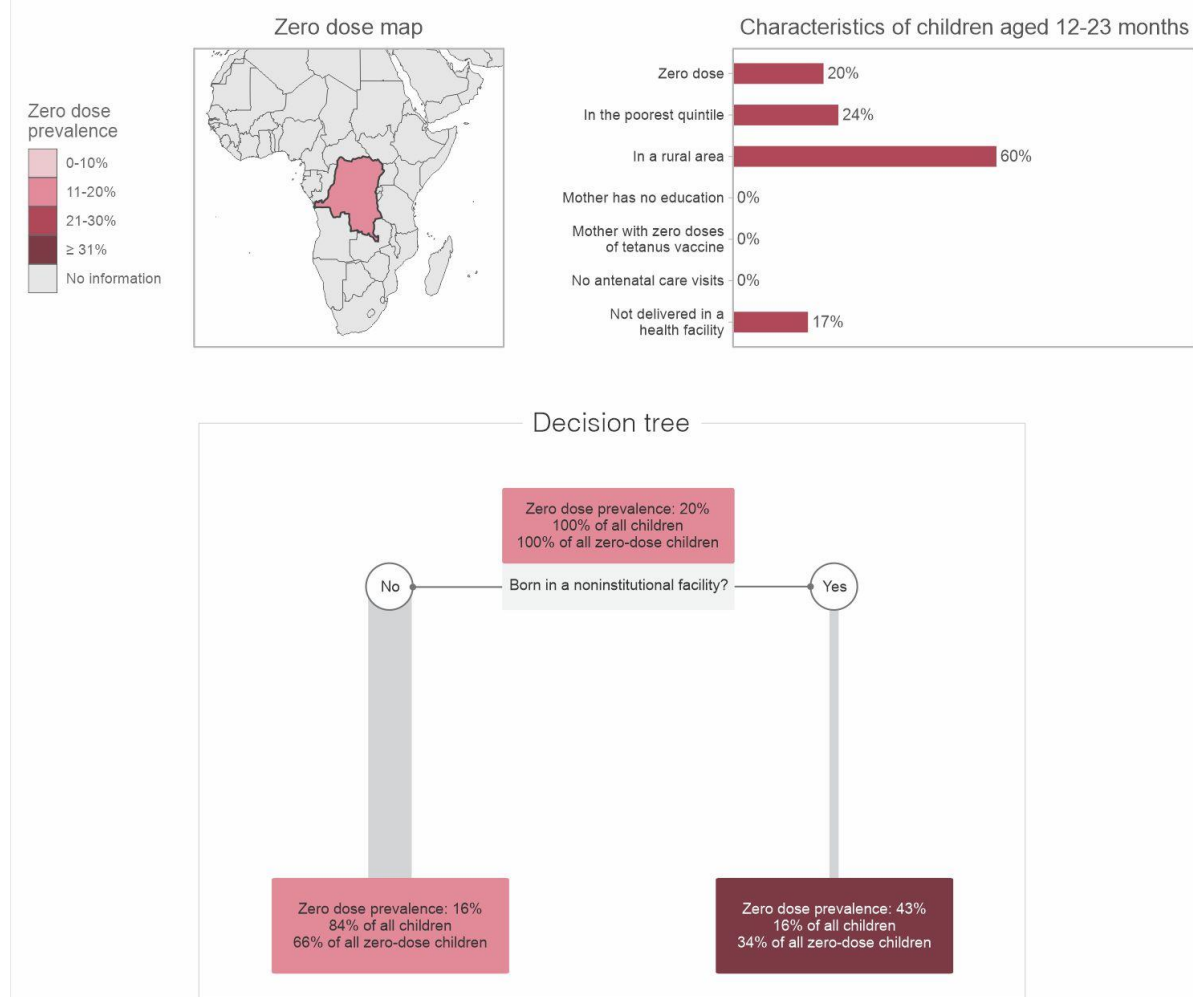

**Figure S18.** – Congo, Democratic Republic's country profile.

## Costa Rica, 2011

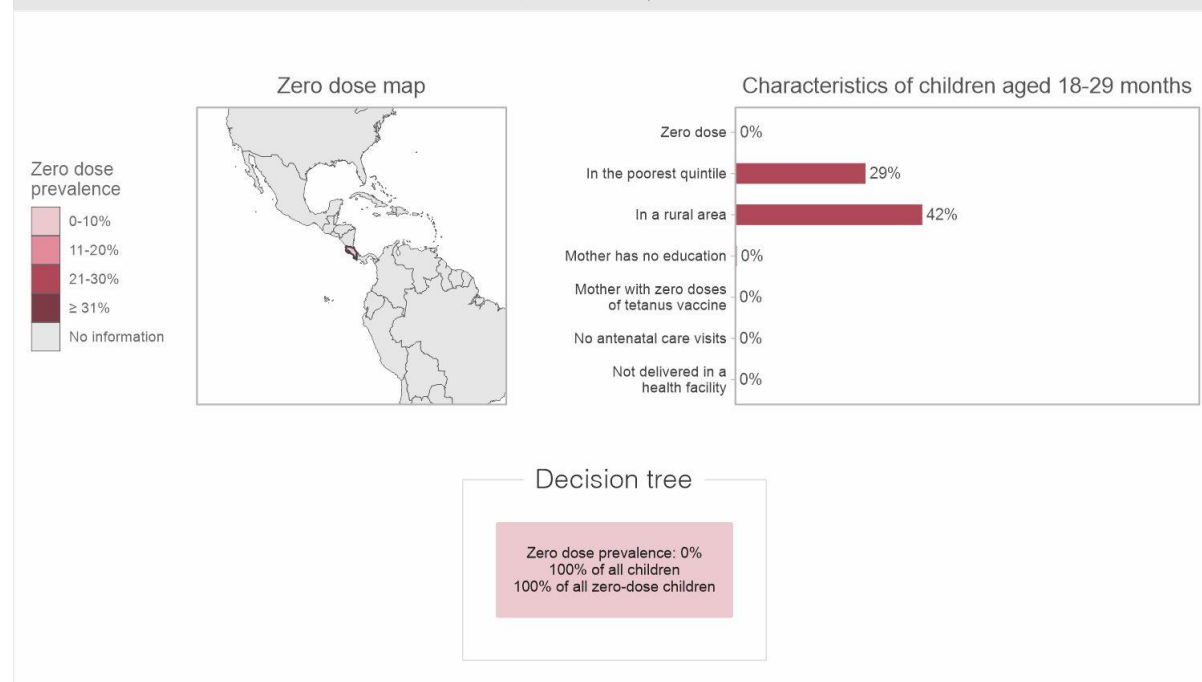

**Figure S19.** – Costa Rica’s country profile.

## Côte d'Ivoire, 2016

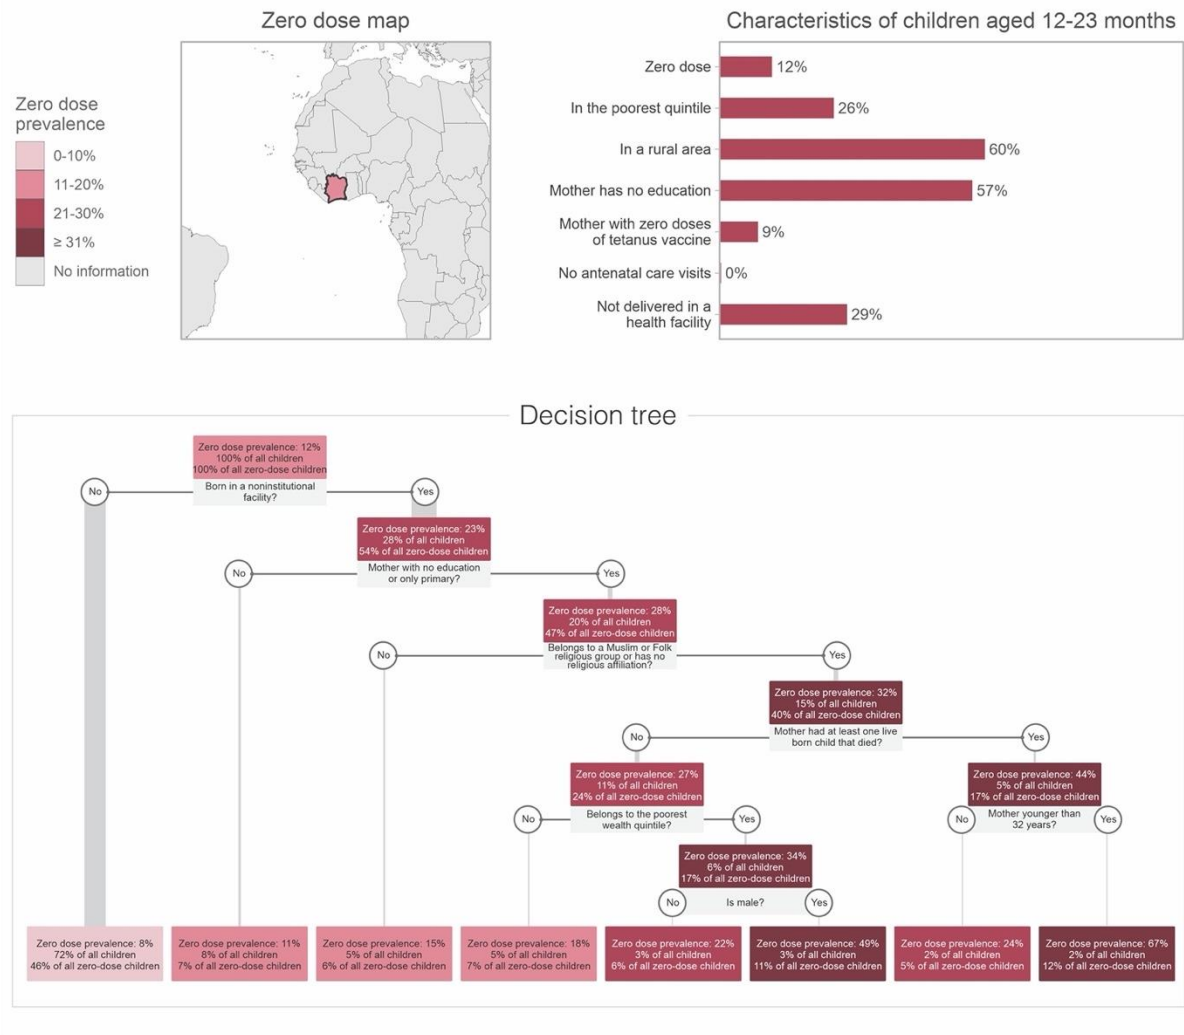

Figure S20. – Côte d'Ivoire country profile.

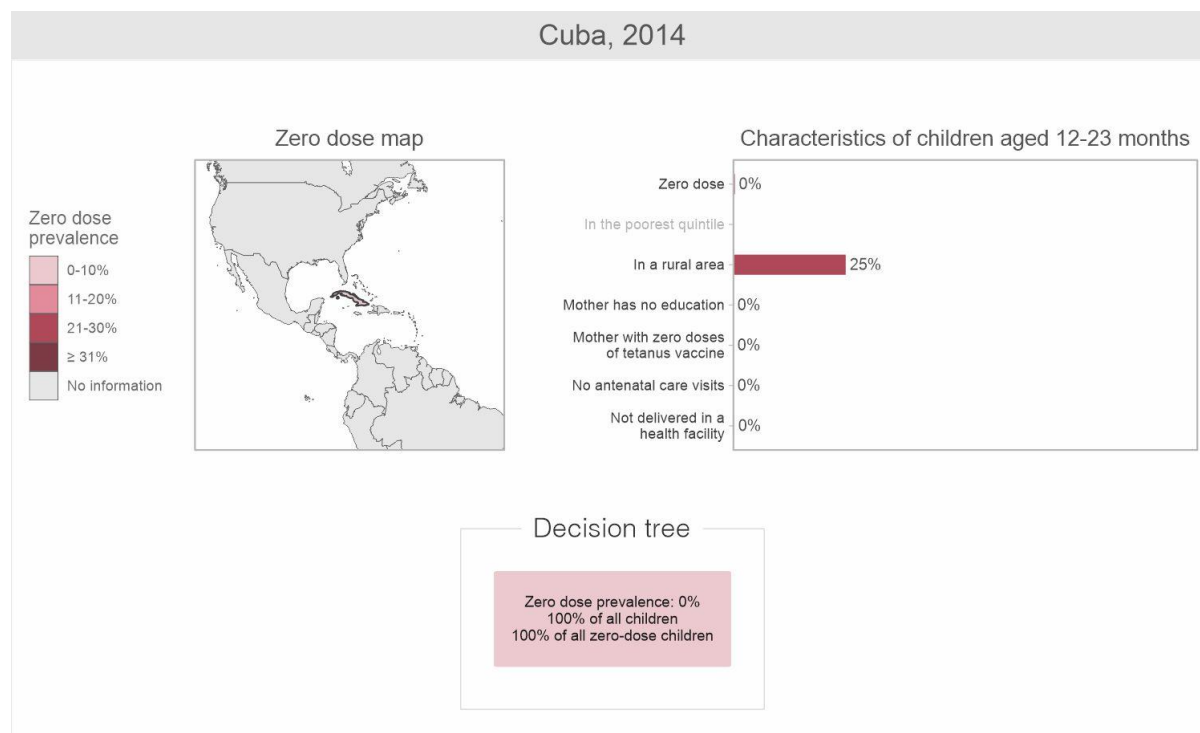

**Figure S21.** – Cuba’s country profile.

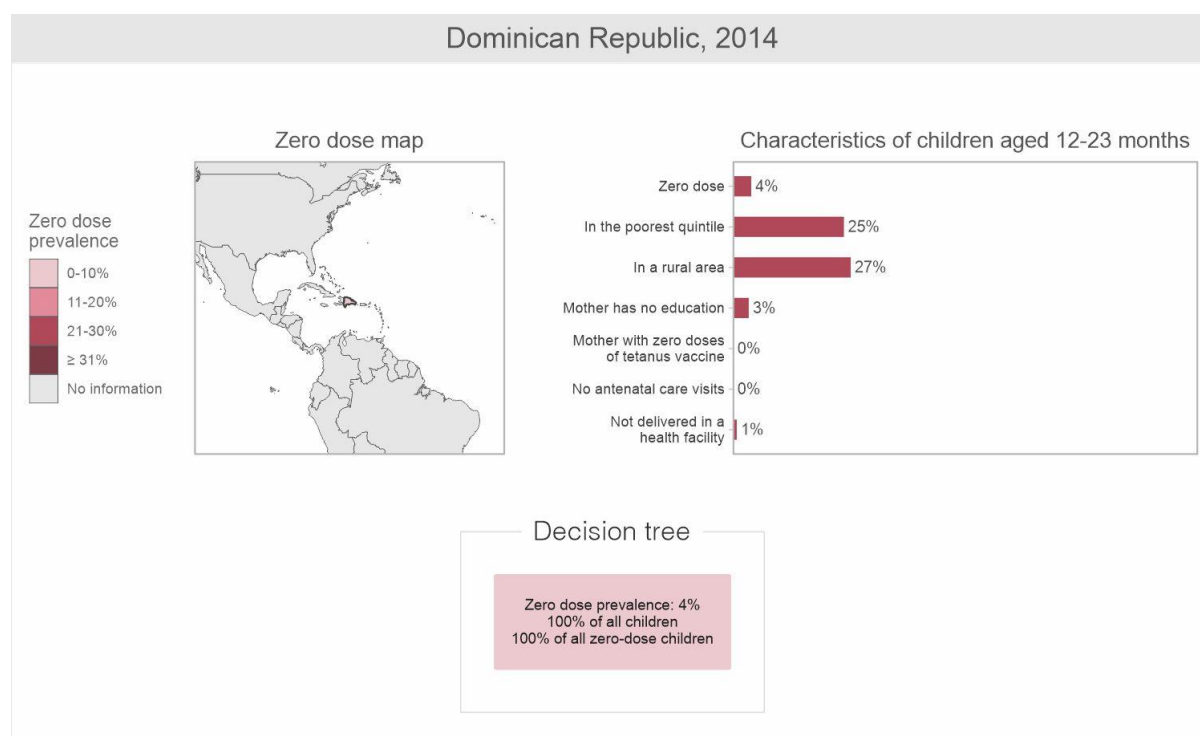

**Figure S22.** – Dominican Republic’s country profile.

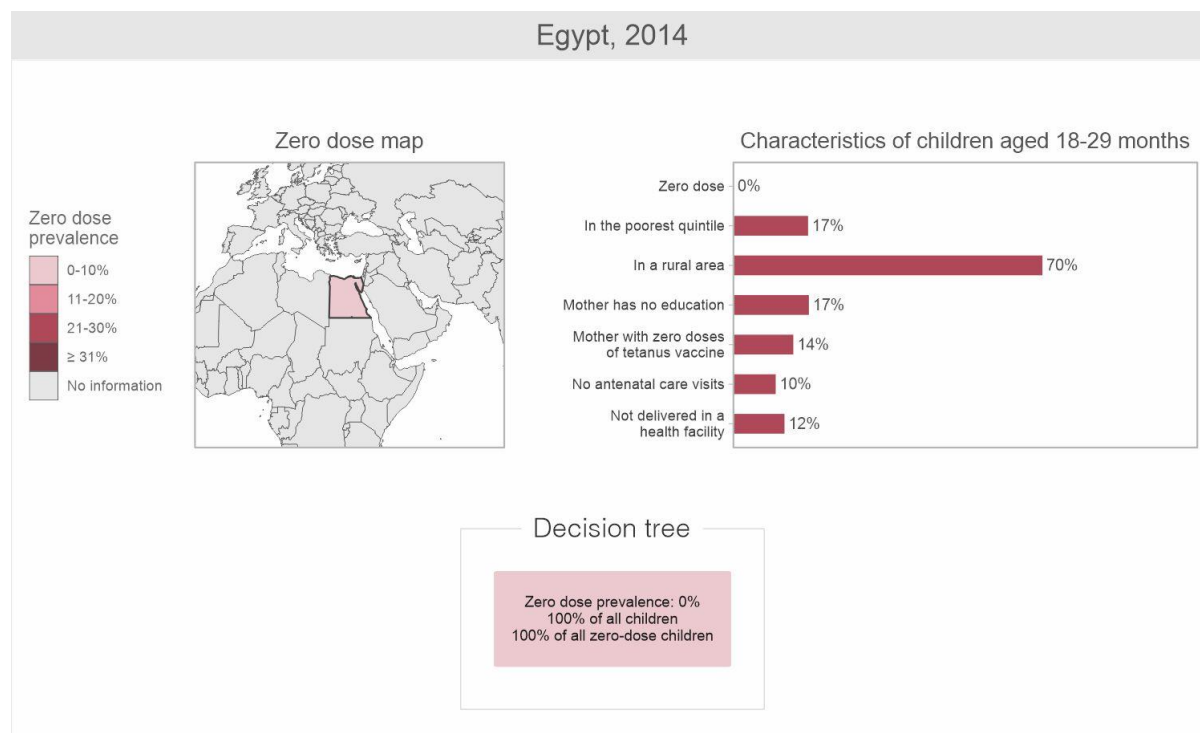

**Figure S23.** – Egypt’s country profile.

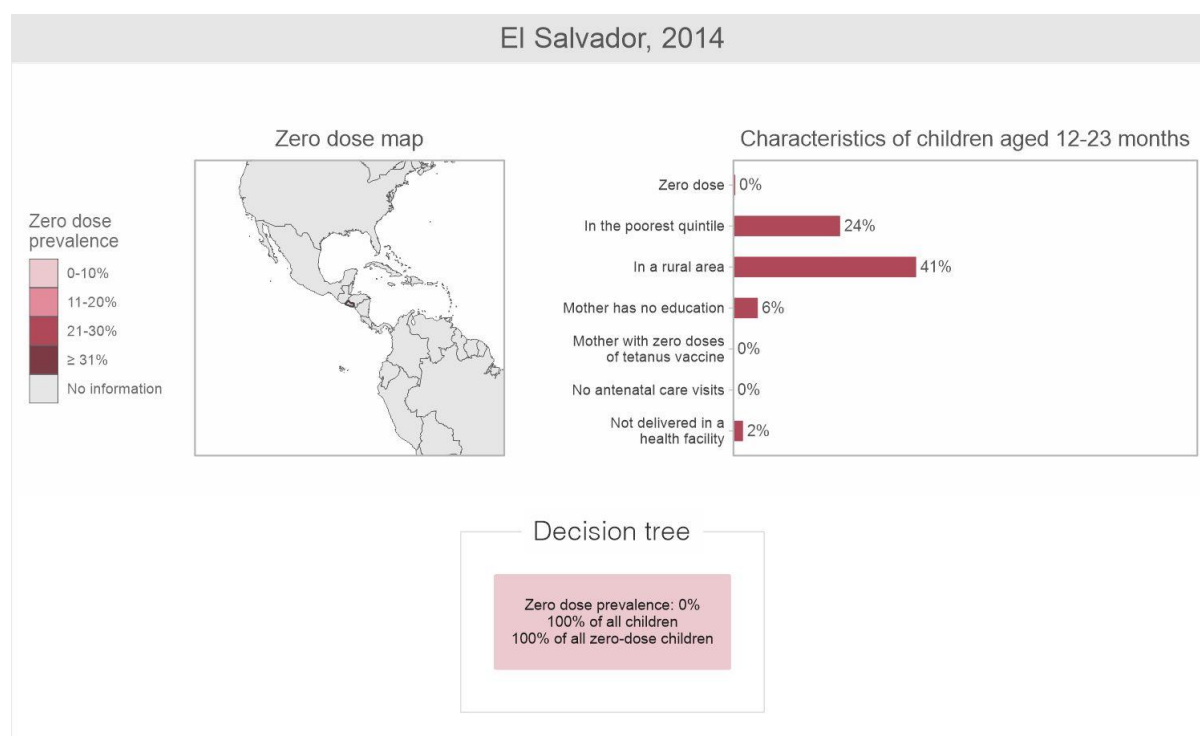

**Figure S24.** – El Salvador’s country profile.

## Eswatini, 2014

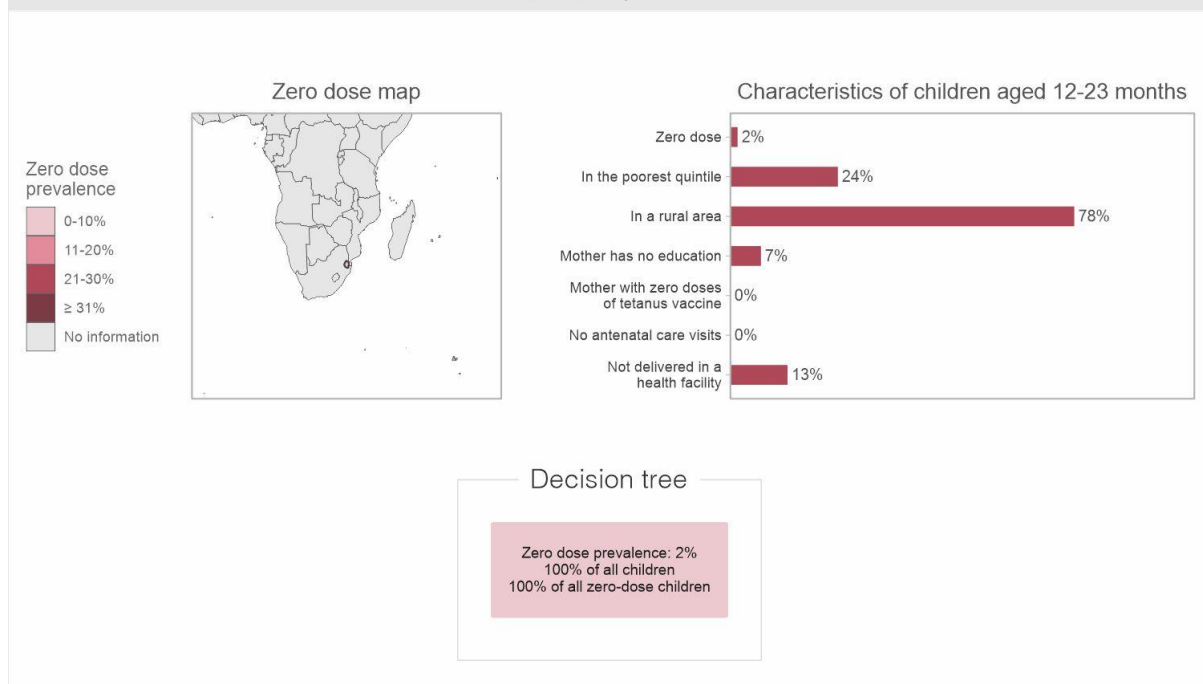

**Figure S25.** – Eswatini’s country profile.



# Ethiopia, 2016

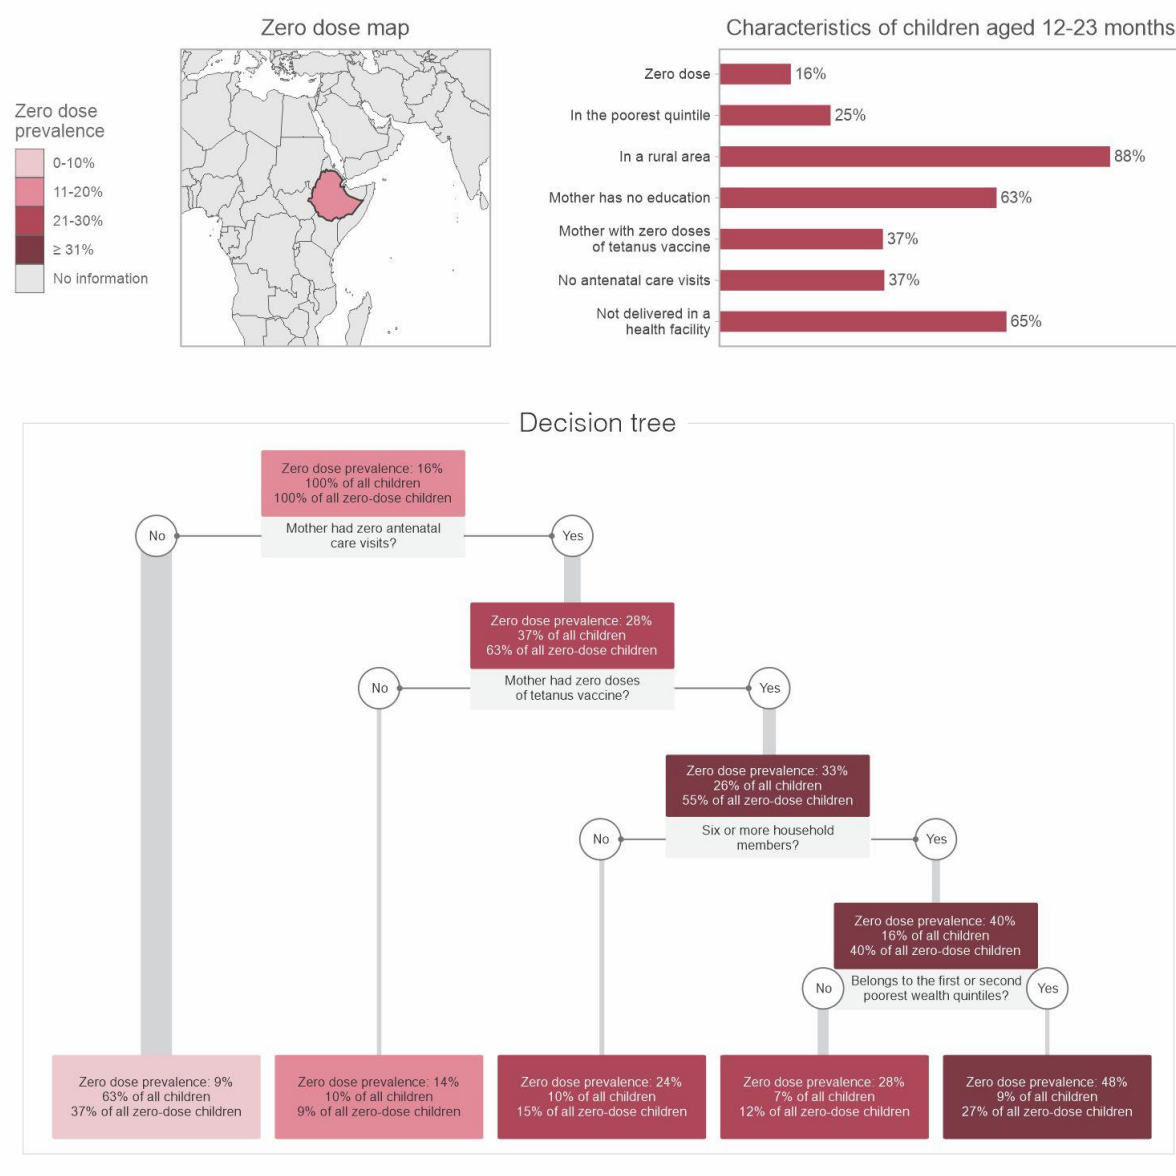

**Figure S26. – Ethiopia’s country profile.**

## Gabon, 2012

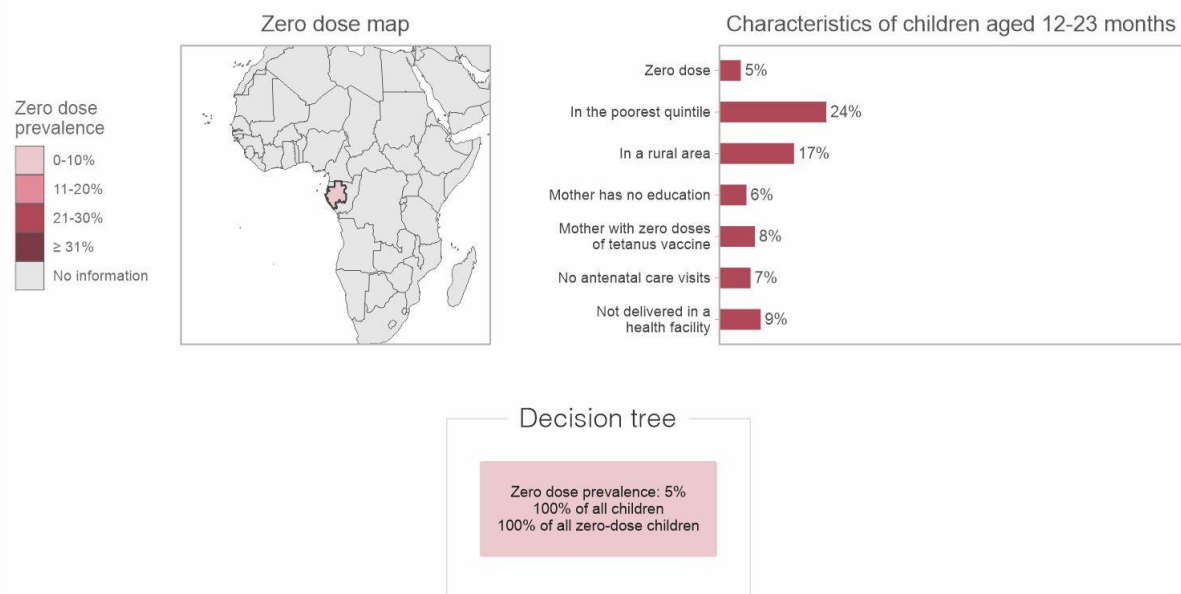

Figure S27. – Gabon's country profile.

## Gambia, 2018

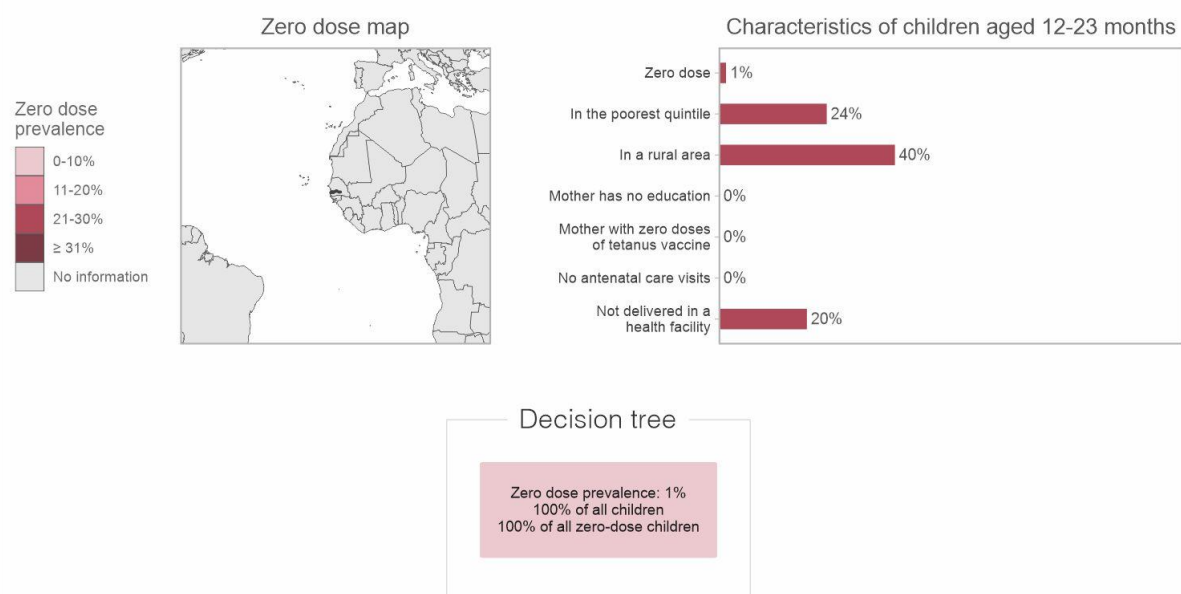

Figure S28. – Gambia's country profile.

## Ghana, 2017

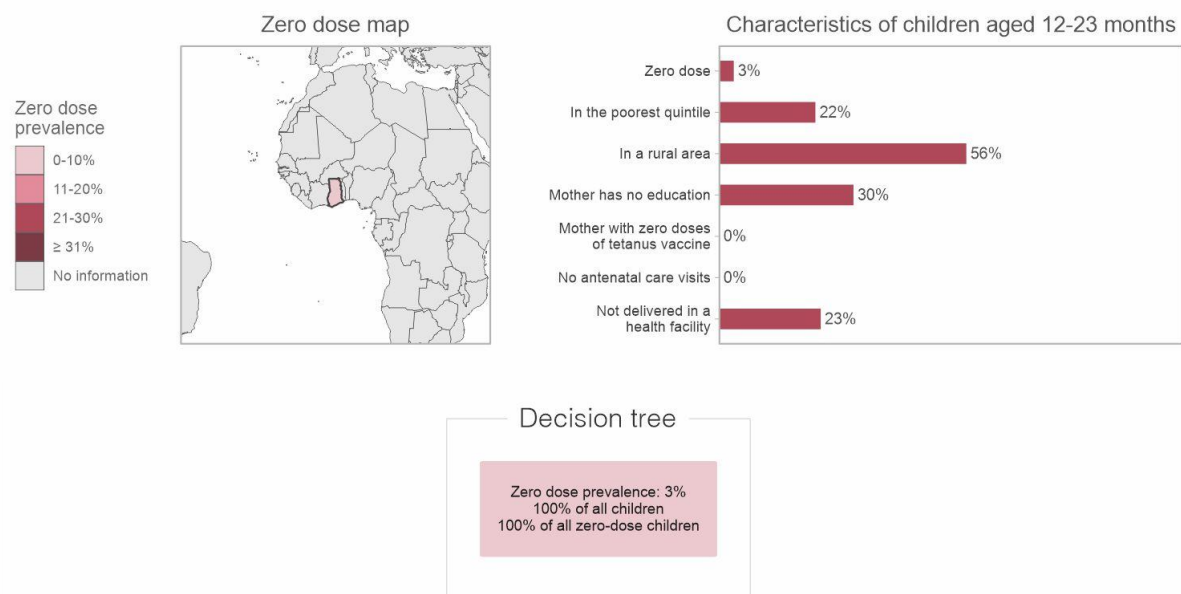

**Figure S29.** – Ghana's country profile.

## Guatemala, 2014

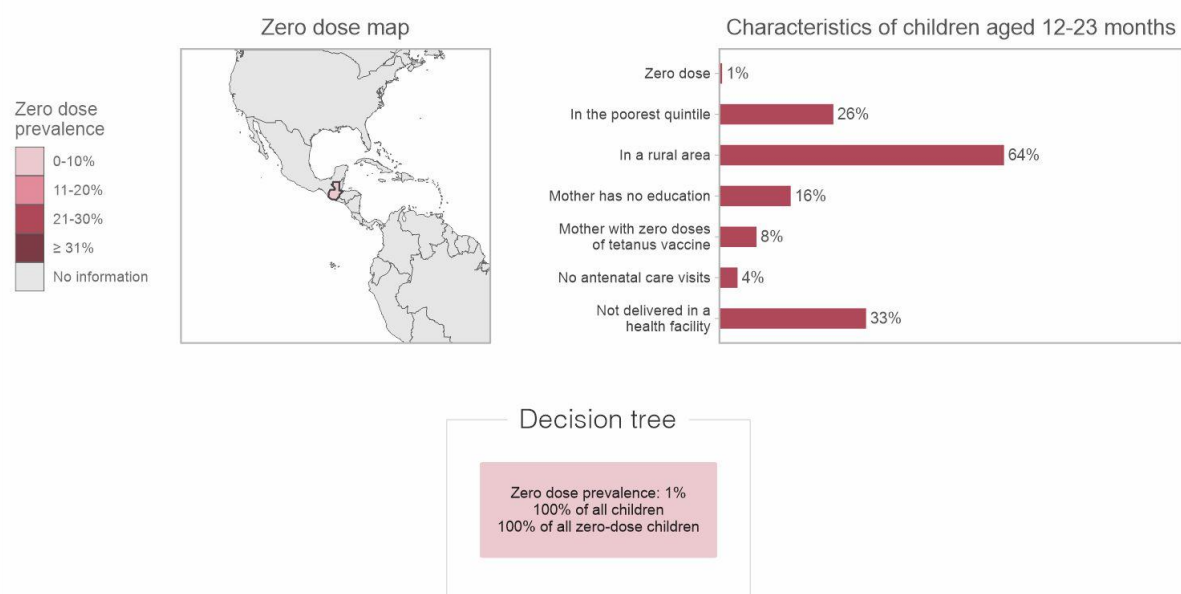

**Figure S30.** – Guatemala's country profile.

## Guinea, 2018

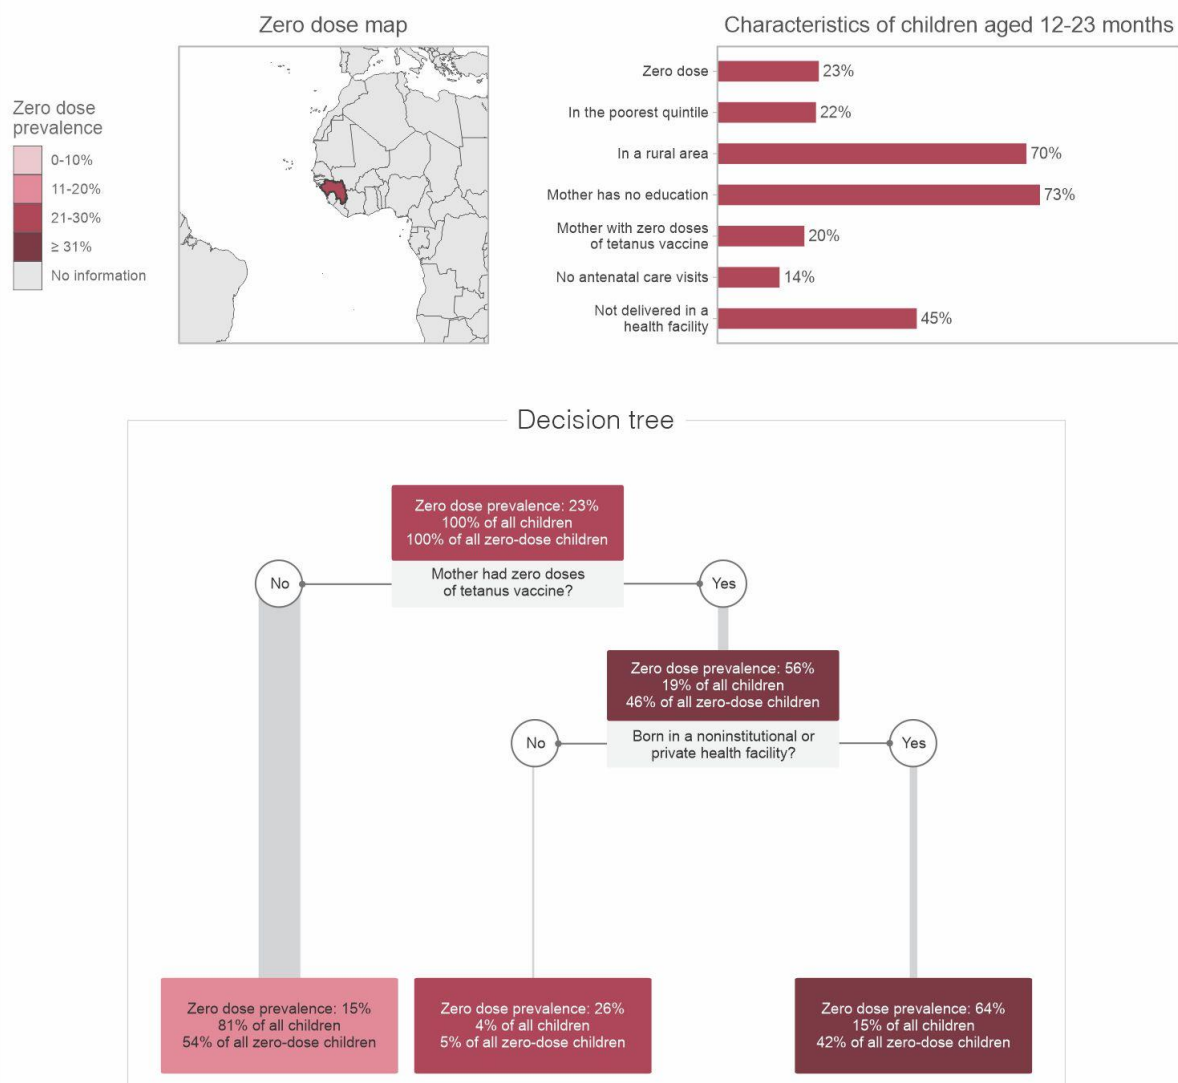

**Figure S31.** – Guinea’s country profile.

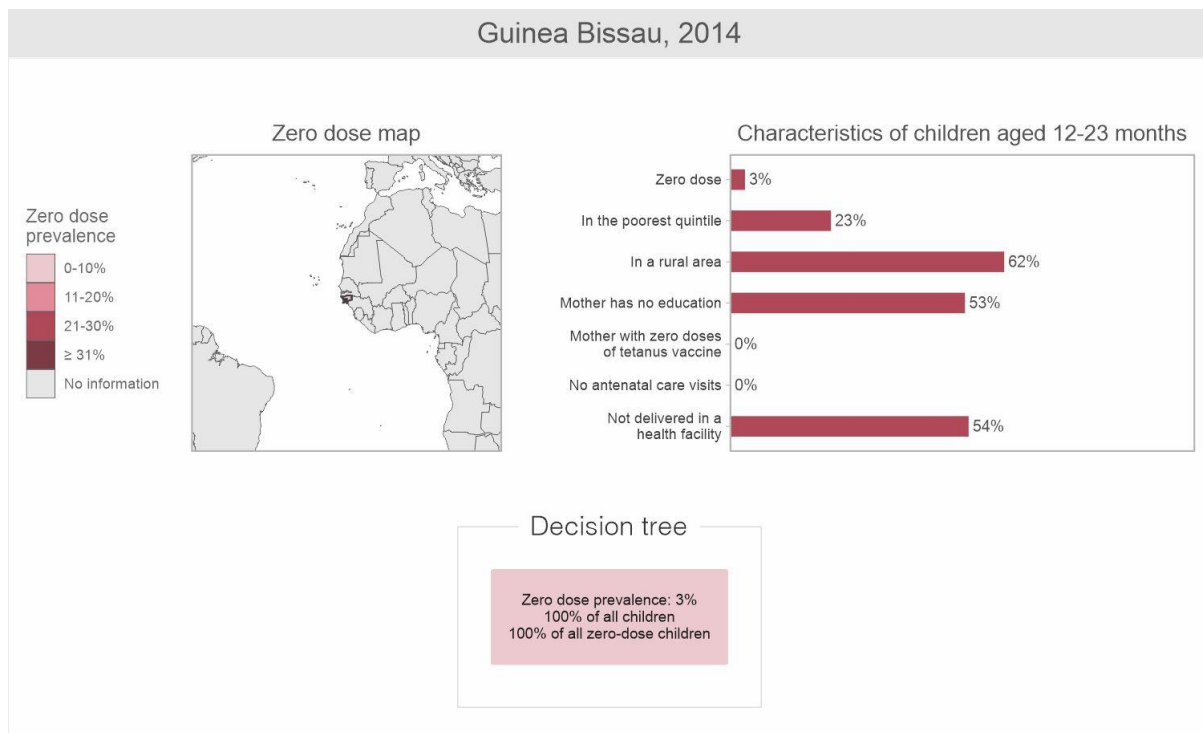

**Figure S32. – Guinea Bissau’s country profile.**

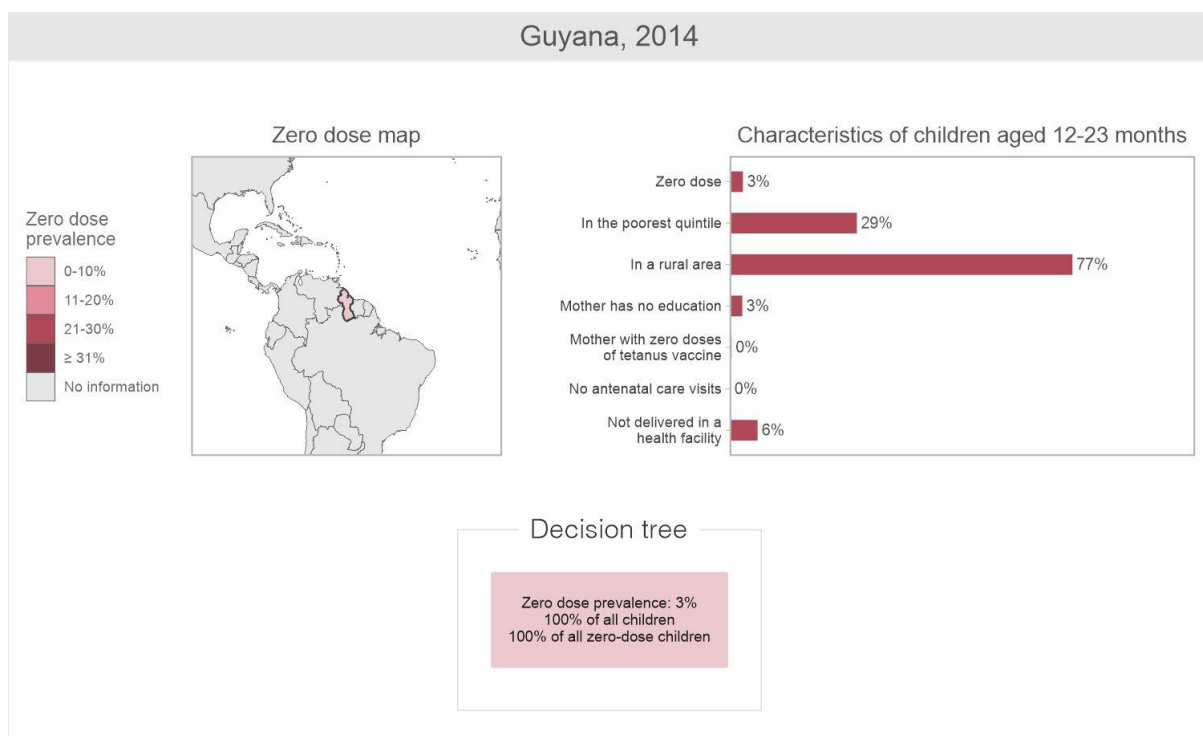

**Figure S33. – Guyana’s country profile.**

## Haiti, 2016

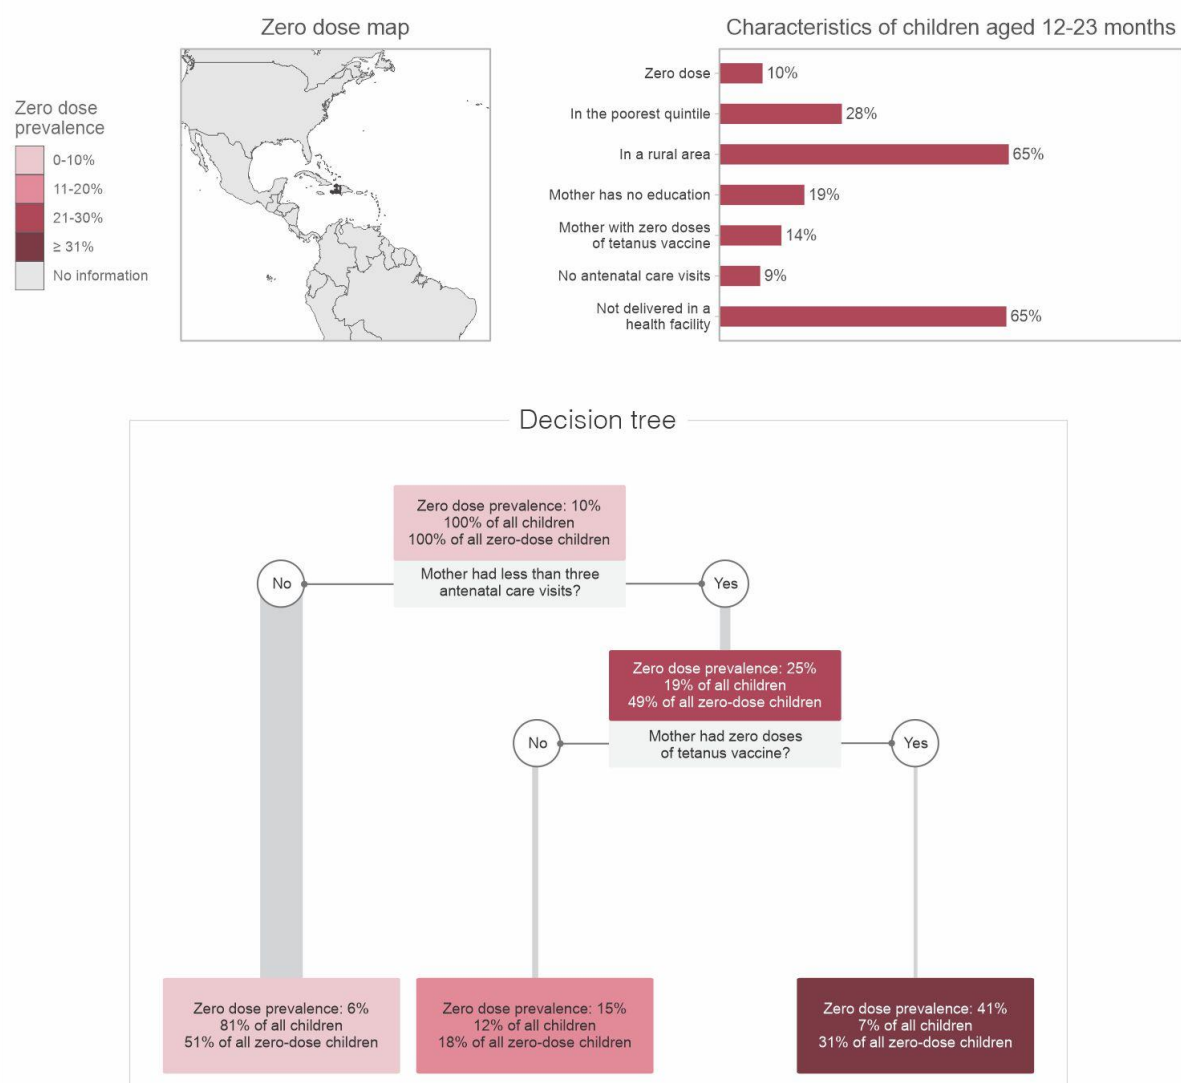

**Figure S34.** – Haiti's country profile.

## Honduras, 2011

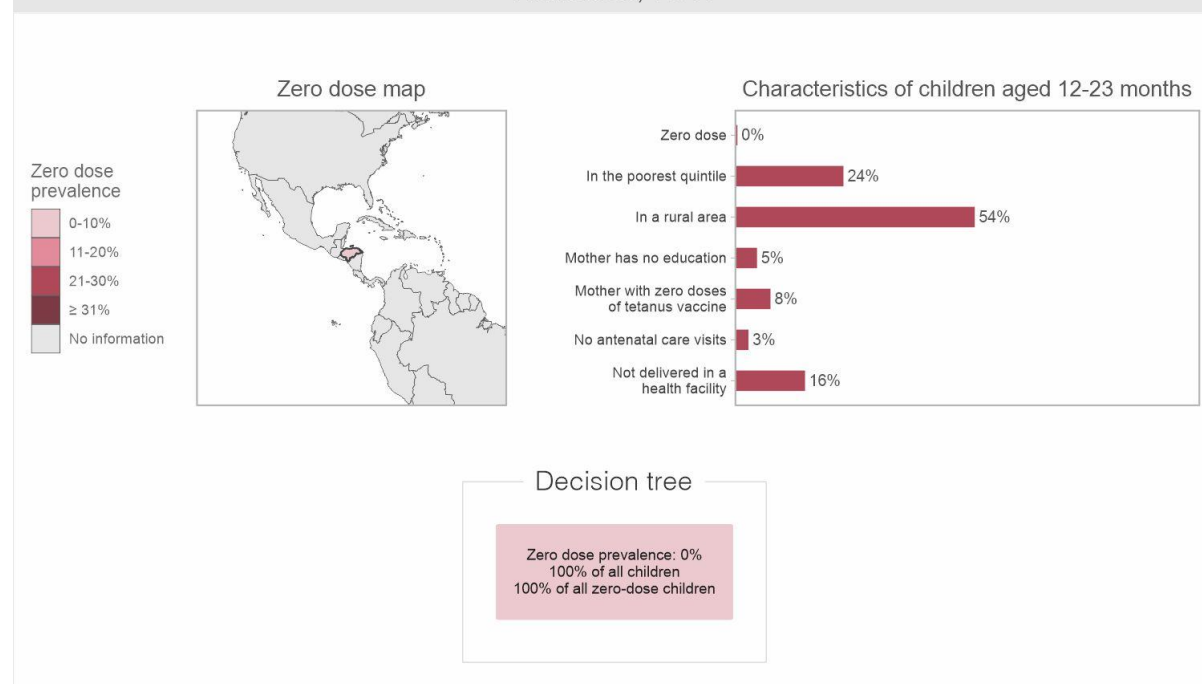

**Figure S35.** – Honduras's country profile.

## India, 2015

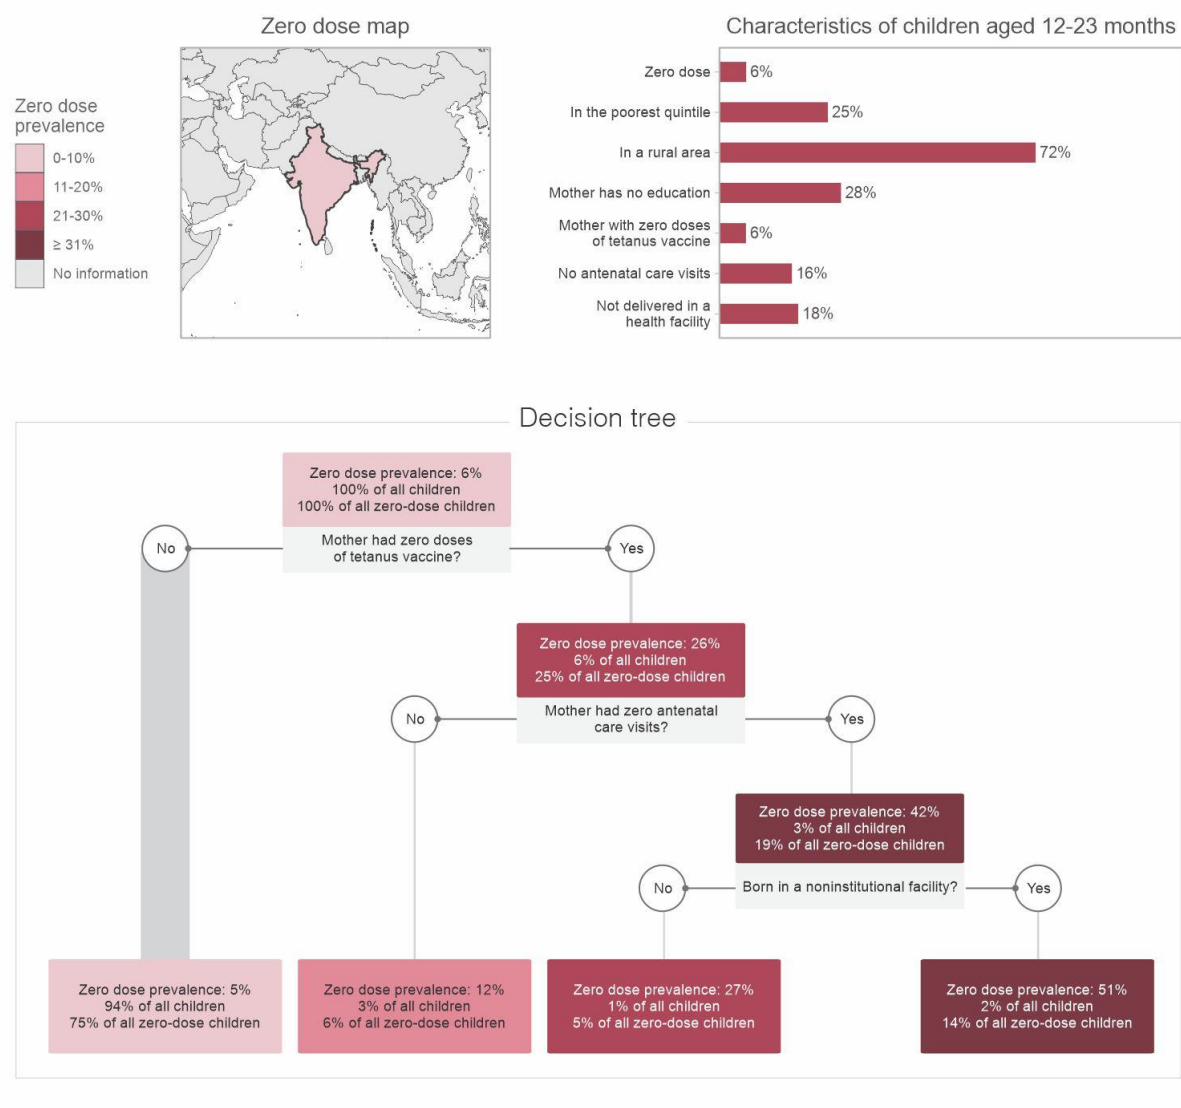

**Figure S36.** – India's country profile.



## Indonesia, 2017

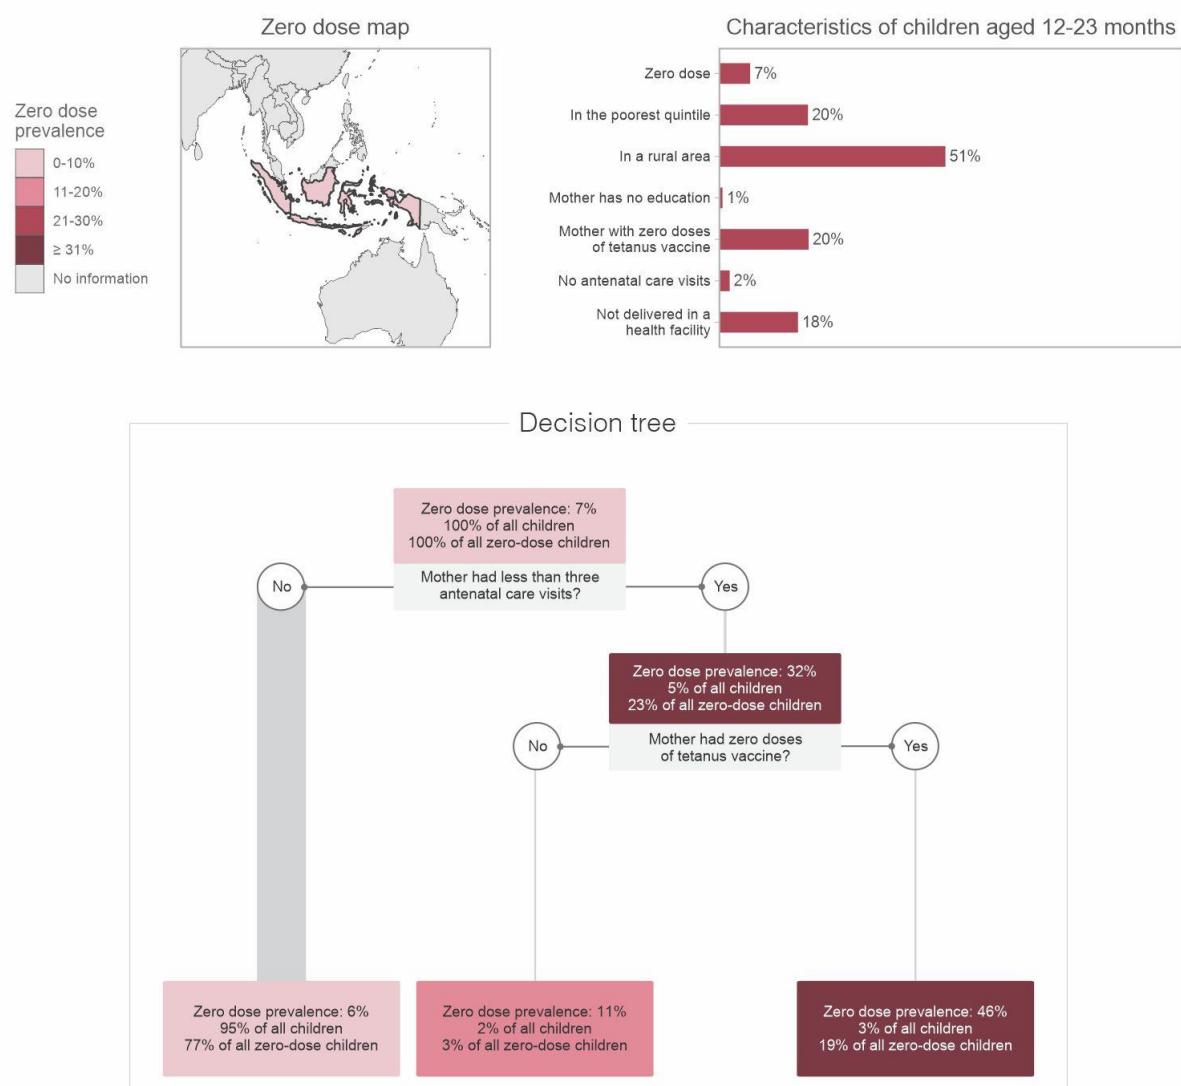

Figure S37. – Indonesia's country profile.

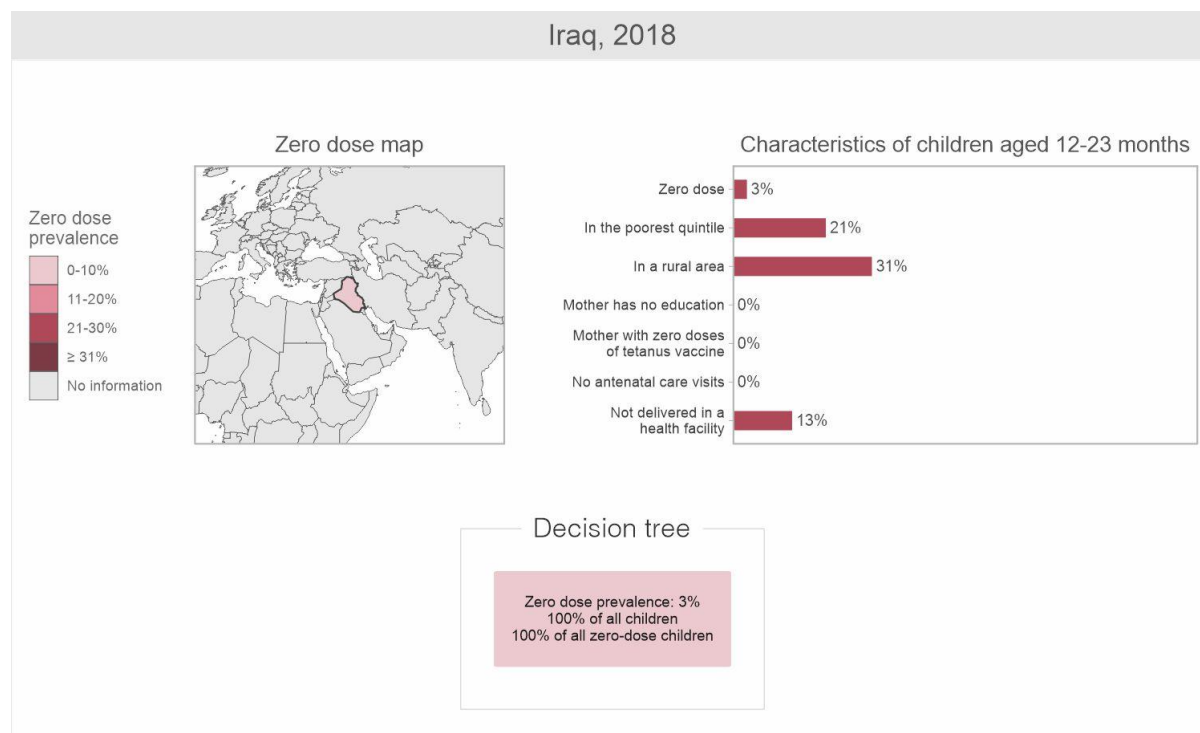

**Figure S38.** – Iraq’s country profile.

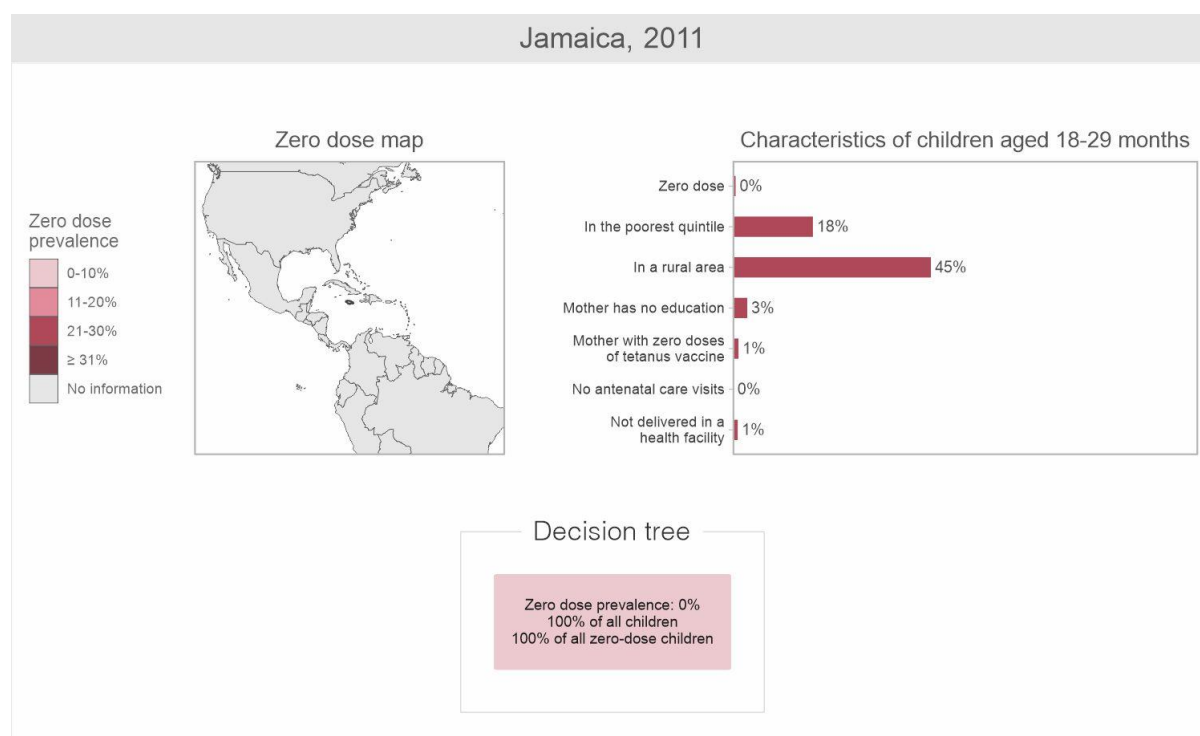

**Figure S39.** – Jamaica’s country profile.

## Jordan, 2017

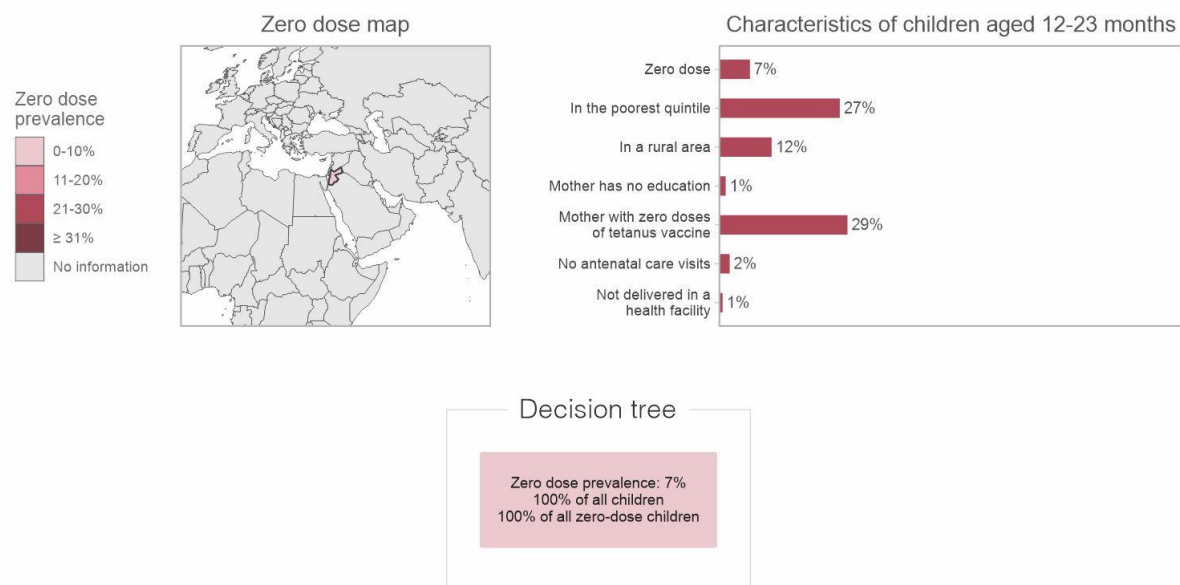

**Figure S40.** – Jordan’s country profile.

## Kazakhstan, 2015

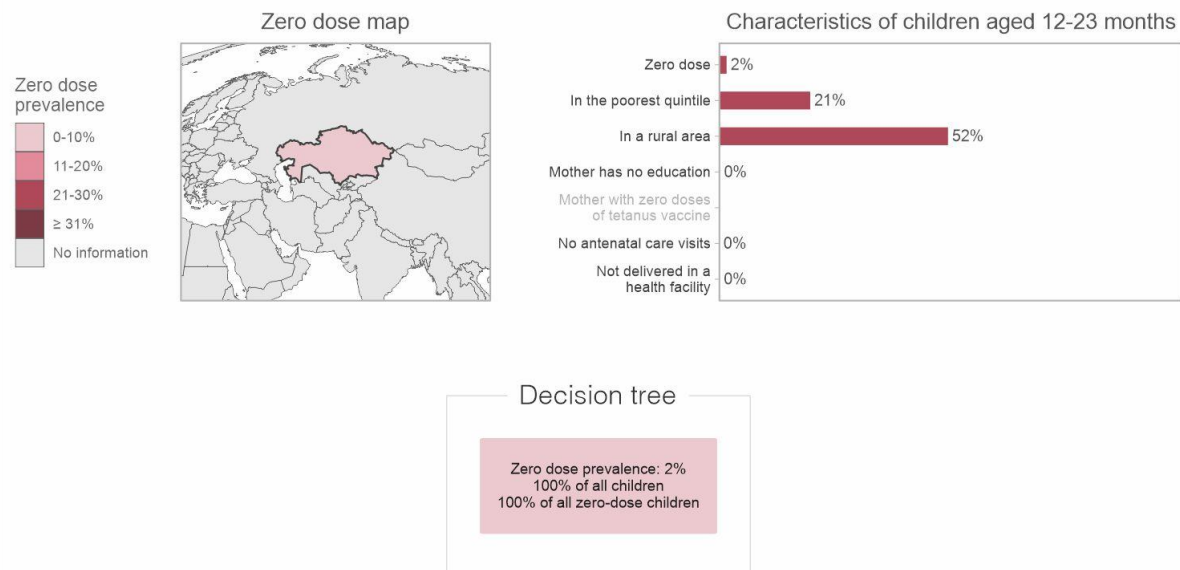

**Figure S41.** – Kazakhstan’s country profile.

## Kenya, 2014

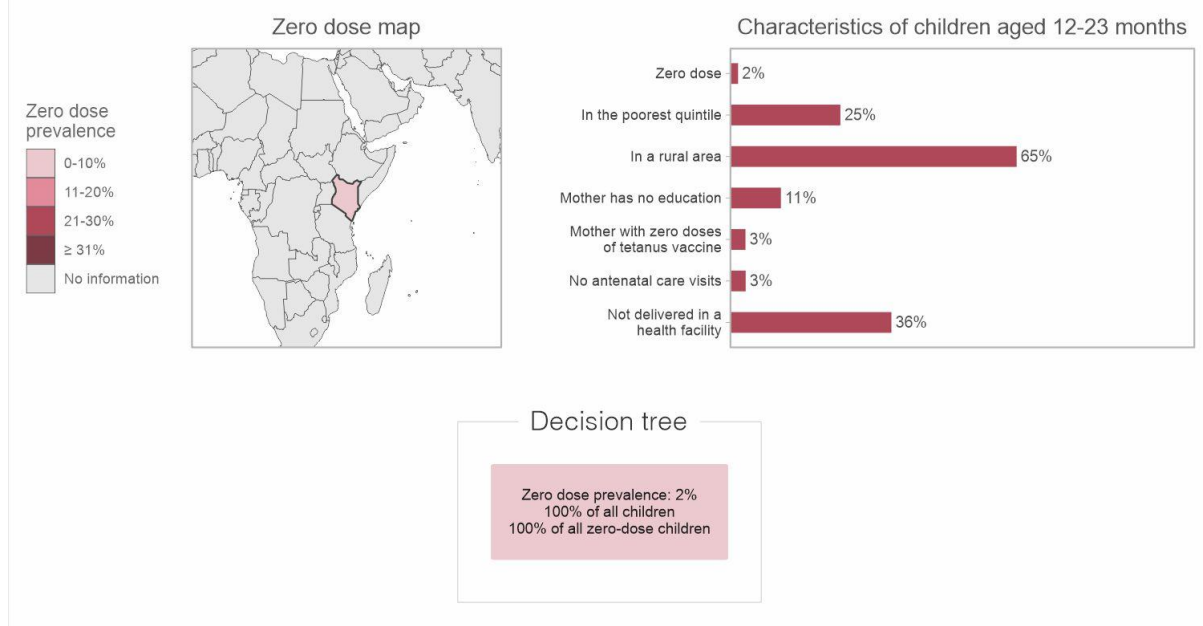

**Figure S42.** – Kenya's country profile.

## Kiribati, 2018

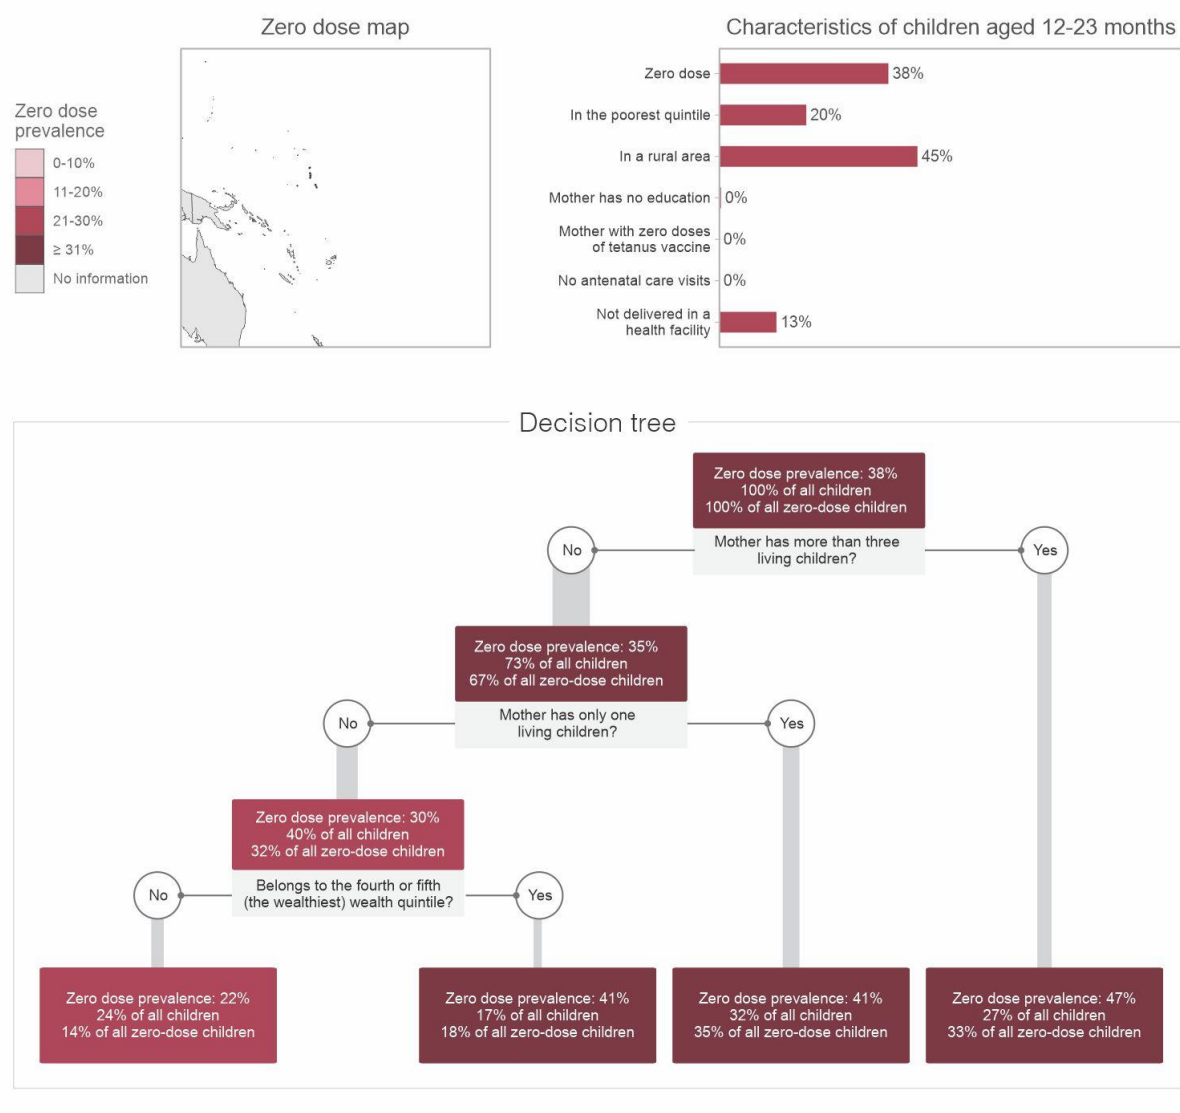

Figure S43. – Kiribati's country profile.

## Kosovo, 2013

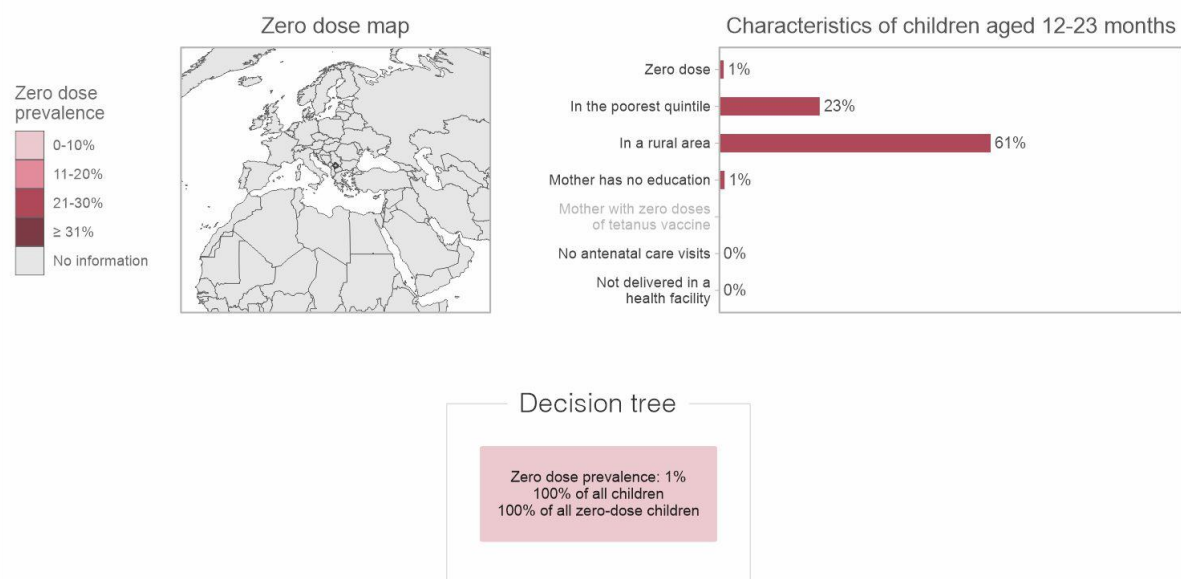

Figure S44. – Kosovo's country profile.

## Kyrgyzstan, 2018

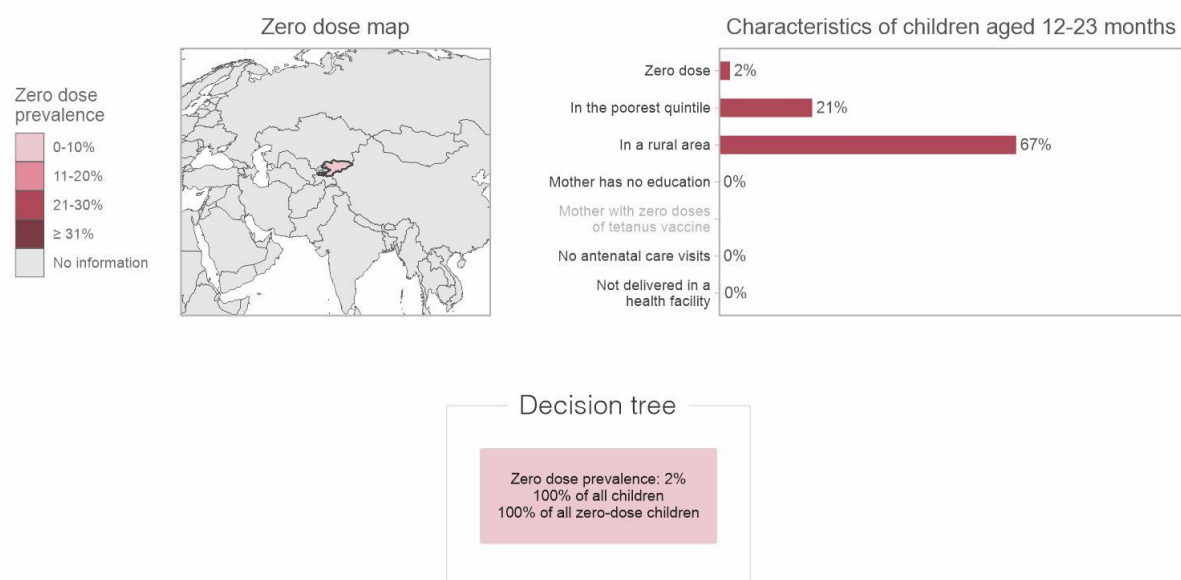

Figure S45. – Kyrgyzstan's country profile.

## Laos, 2017

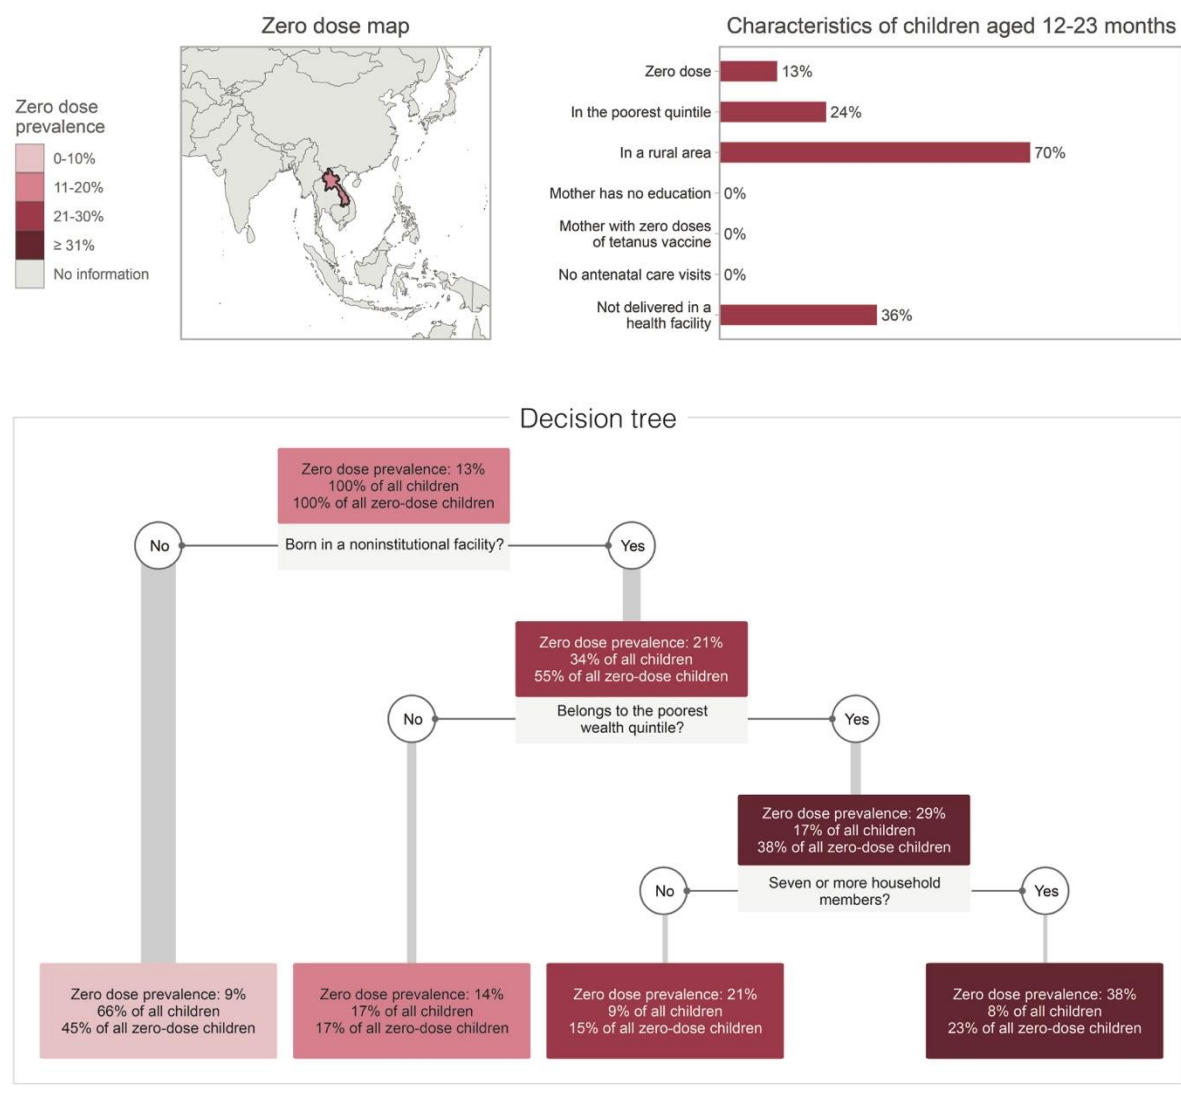

Figure S46. – Laos' country profile.

## Lesotho, 2018

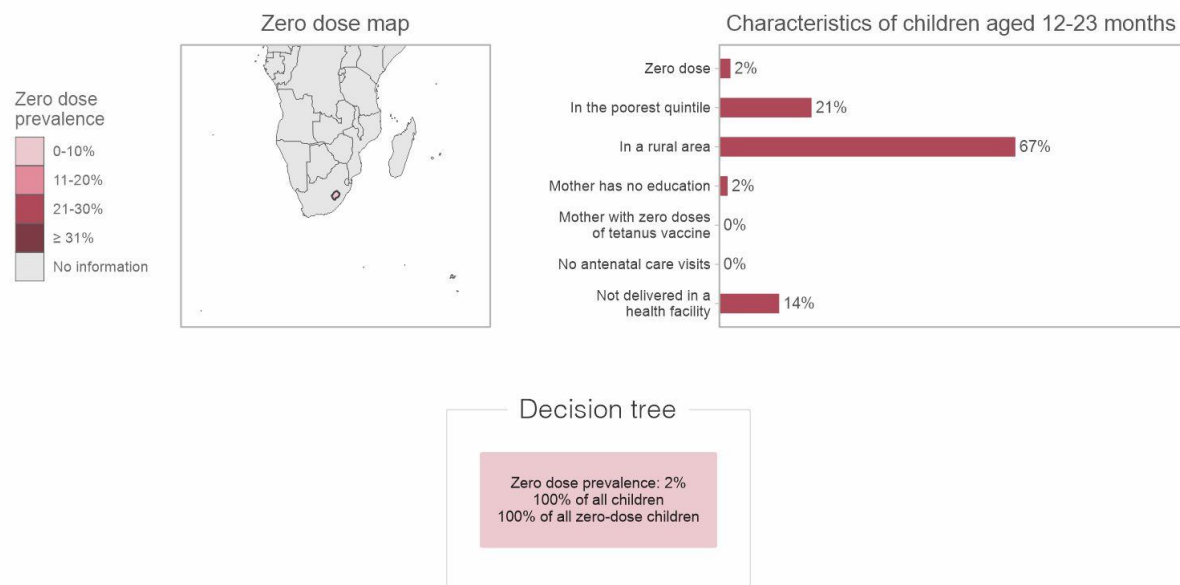

**Figure S47.** – Lesotho’s country profile.

## Liberia, 2013

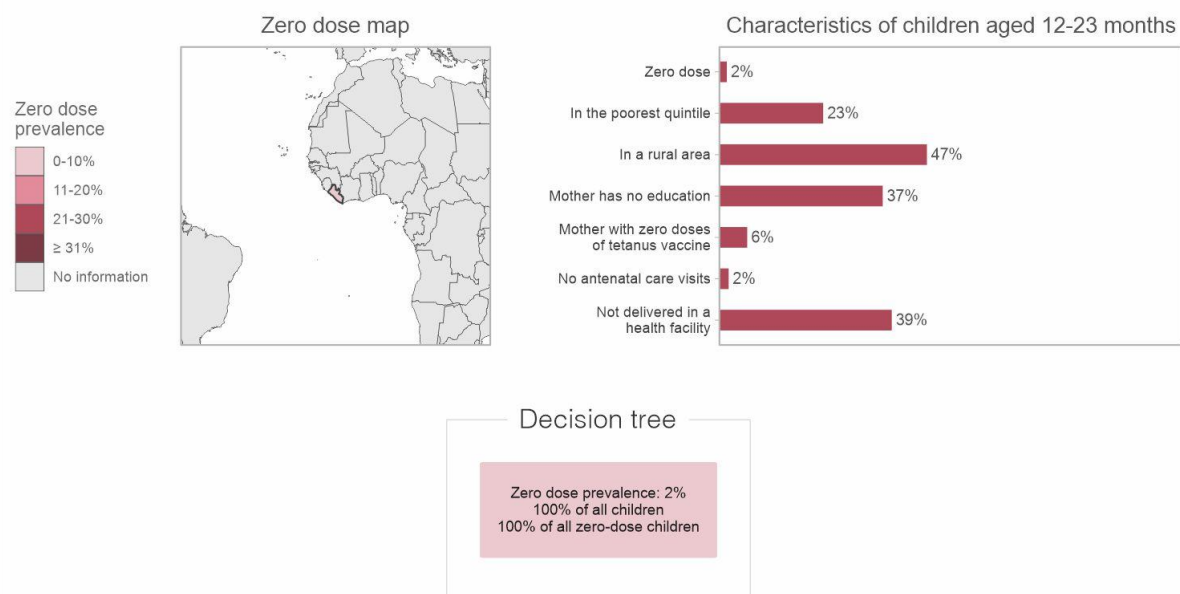

**Figure S48.** – Liberia’s country profile.



## Madagascar, 2018

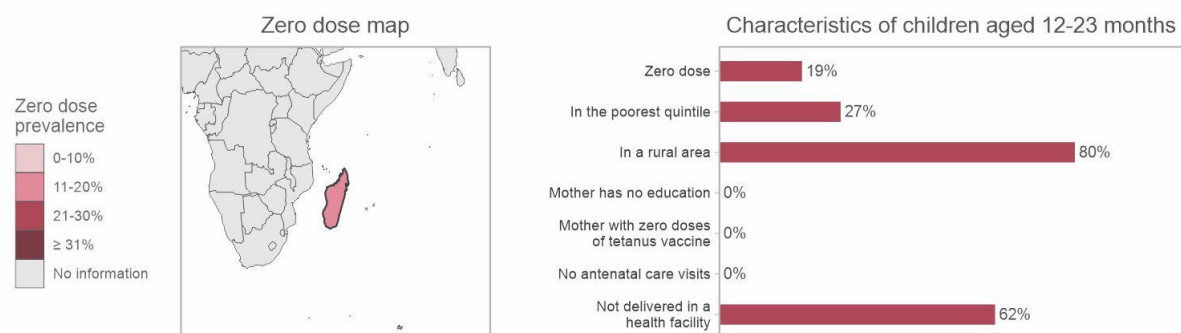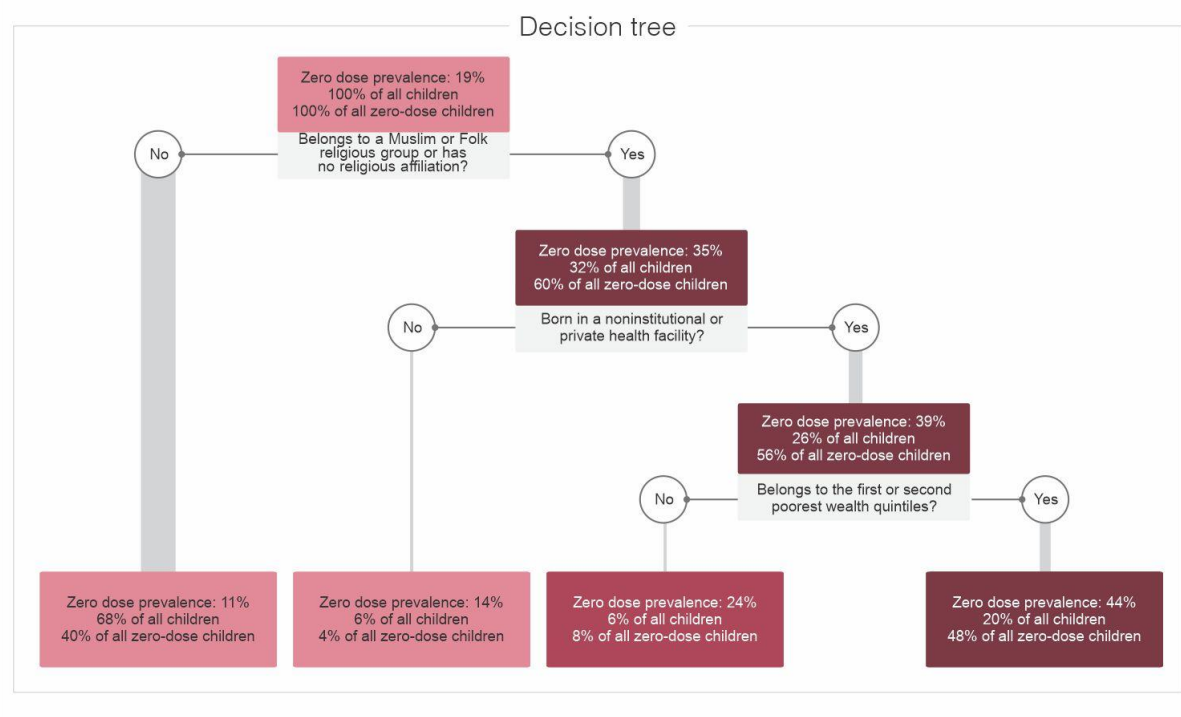

**Figure S49.** – Madagascar's country profile.

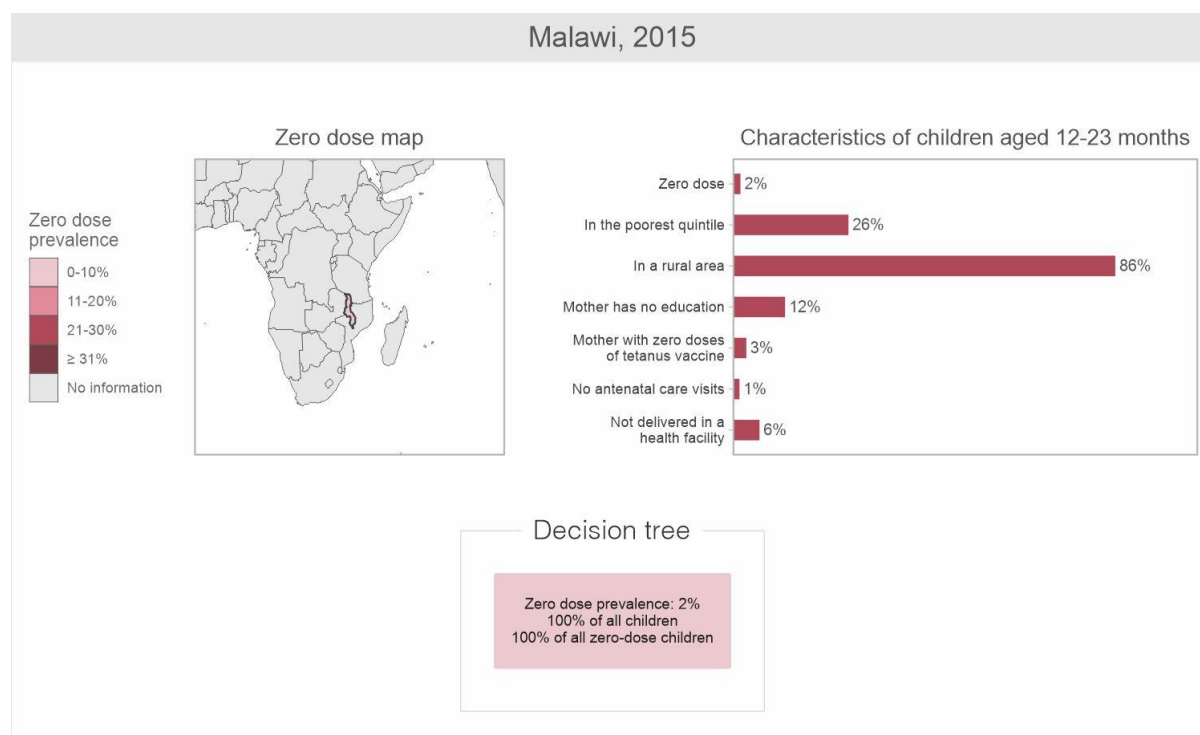

**Figure S50. – Malawi’s country profile.**

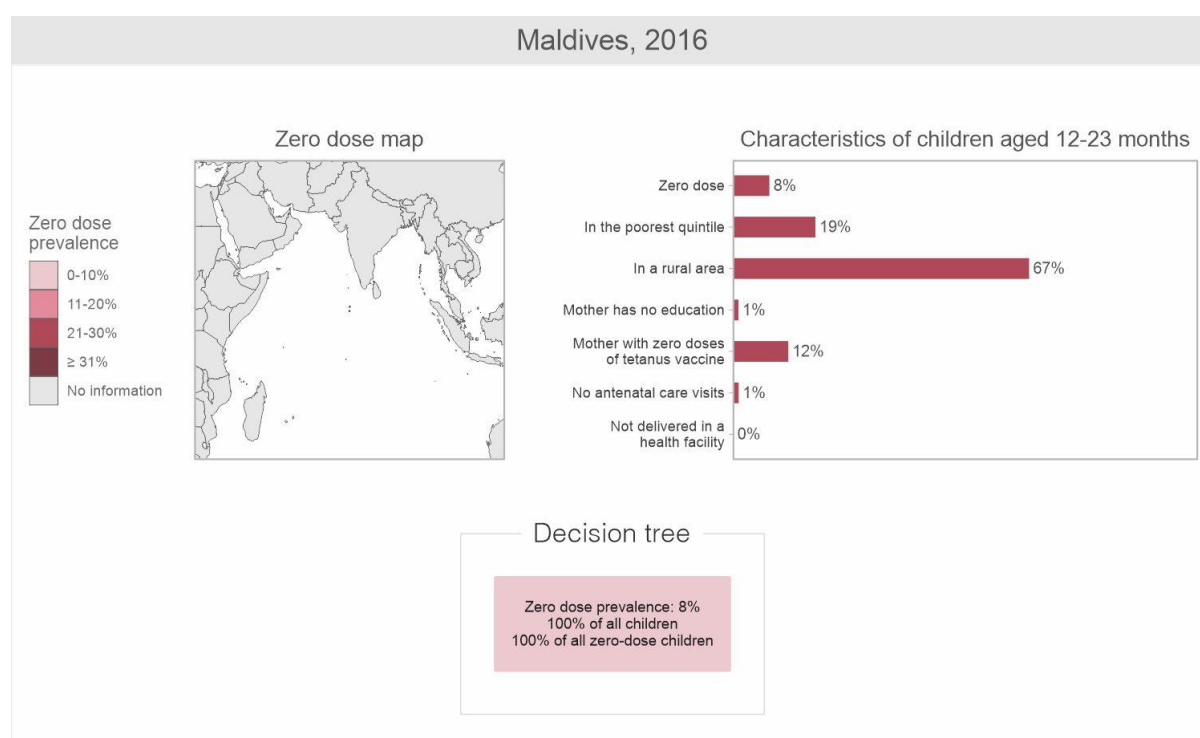

**Figure S51. – Maldives’ country profile.**

## Mali, 2018

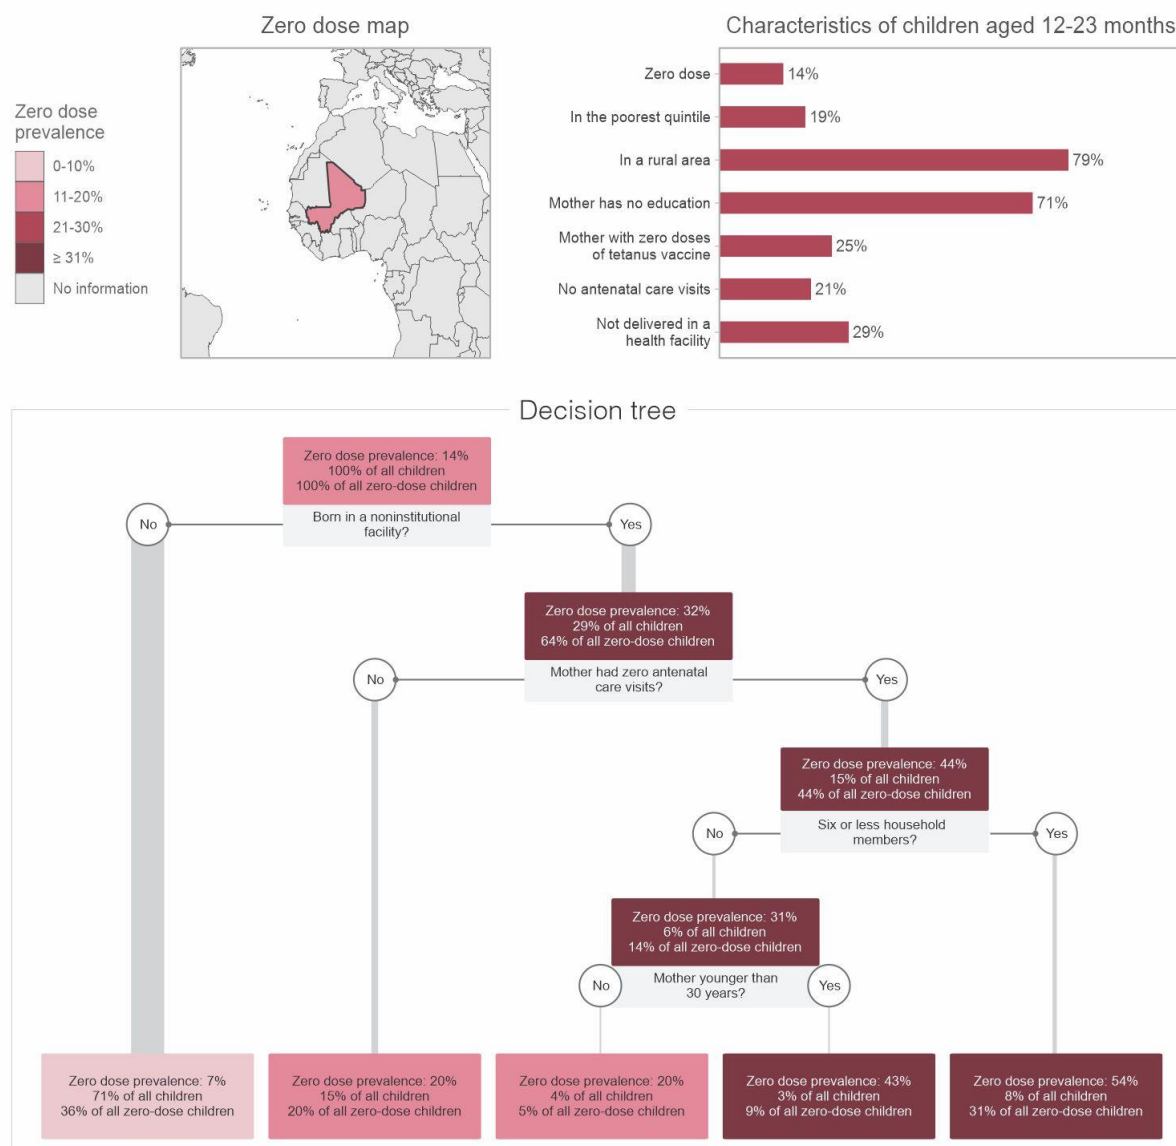

Figure S52. – Mali's country profile.

## Mauritania, 2015

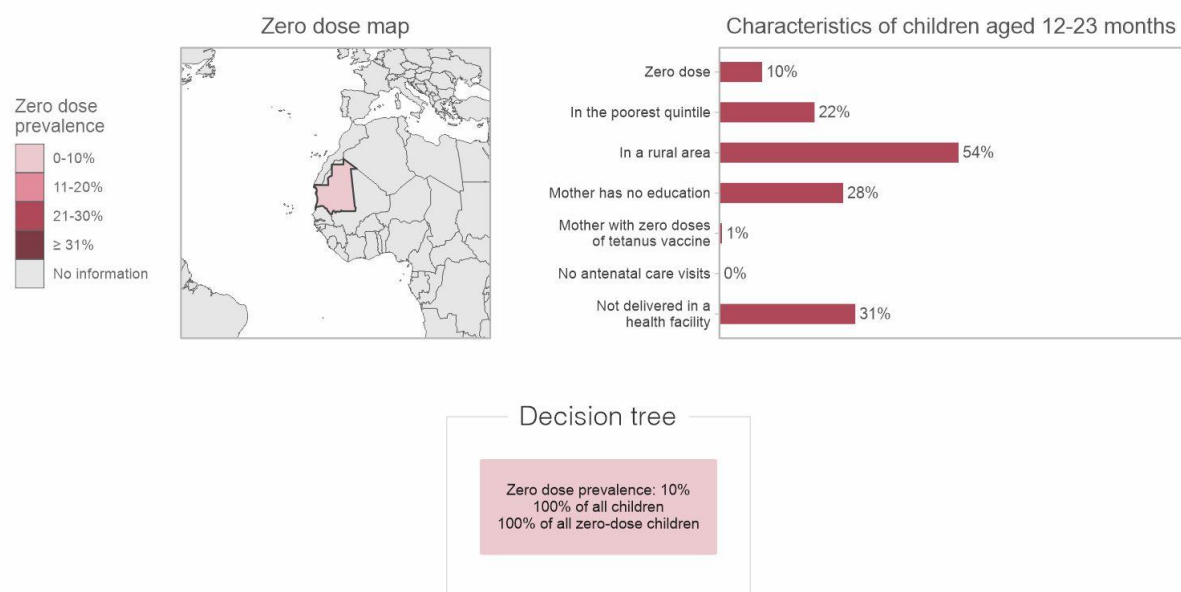

**Figure S53.** – Mauritania’s country profile.

## Mexico, 2015

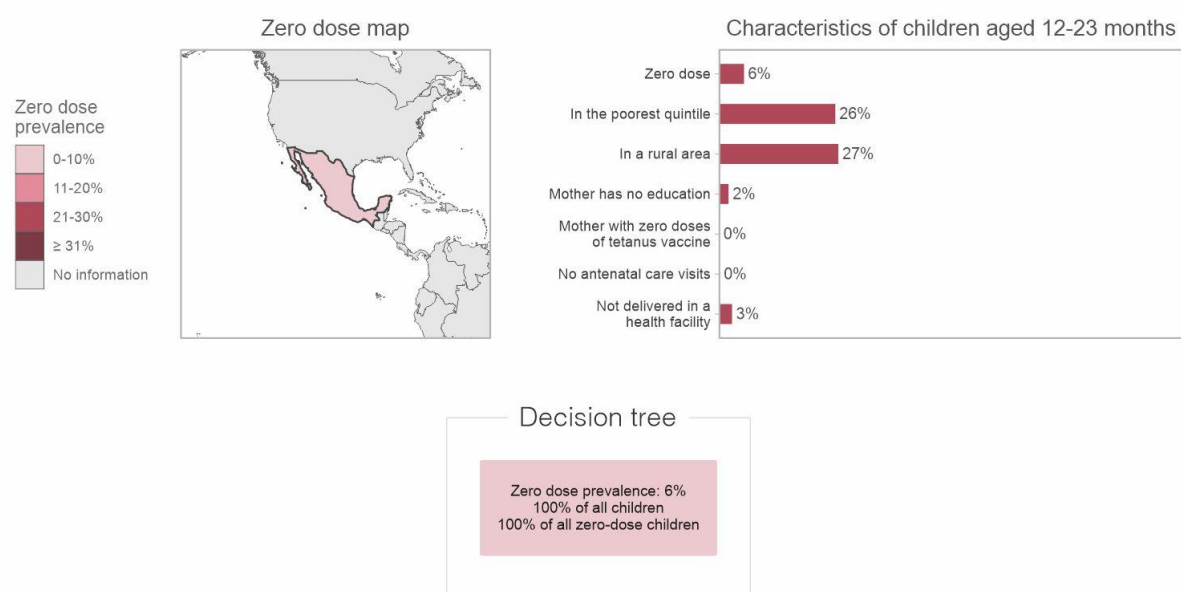

**Figure S54.** – Mexico’s country profile.

## Moldova, 2012

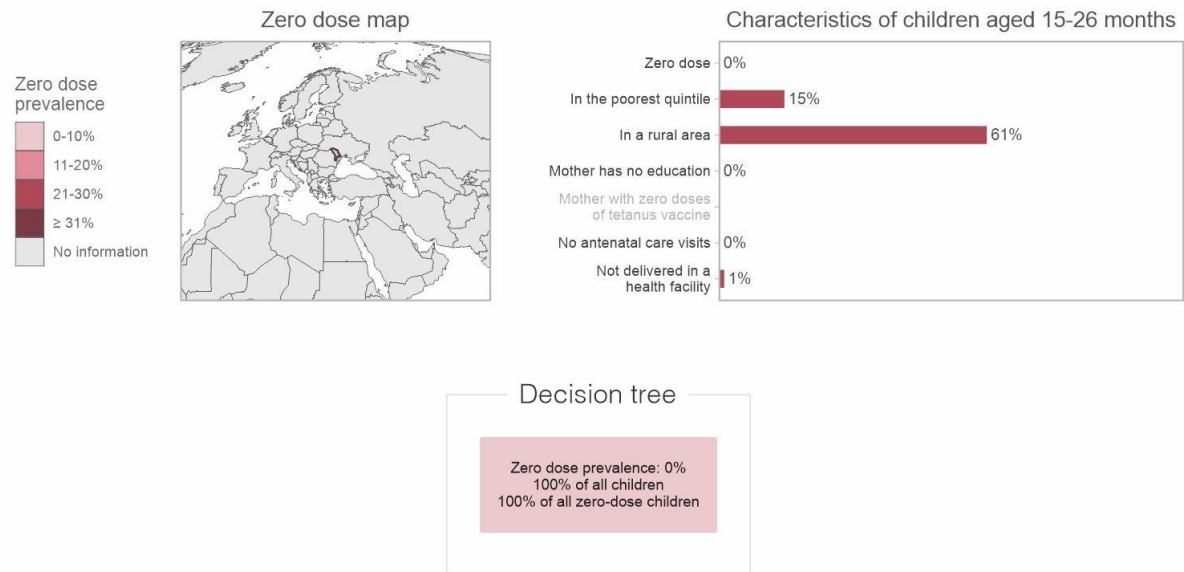

**Figure S55.** – Moldova’s country profile.

## Mongolia, 2018

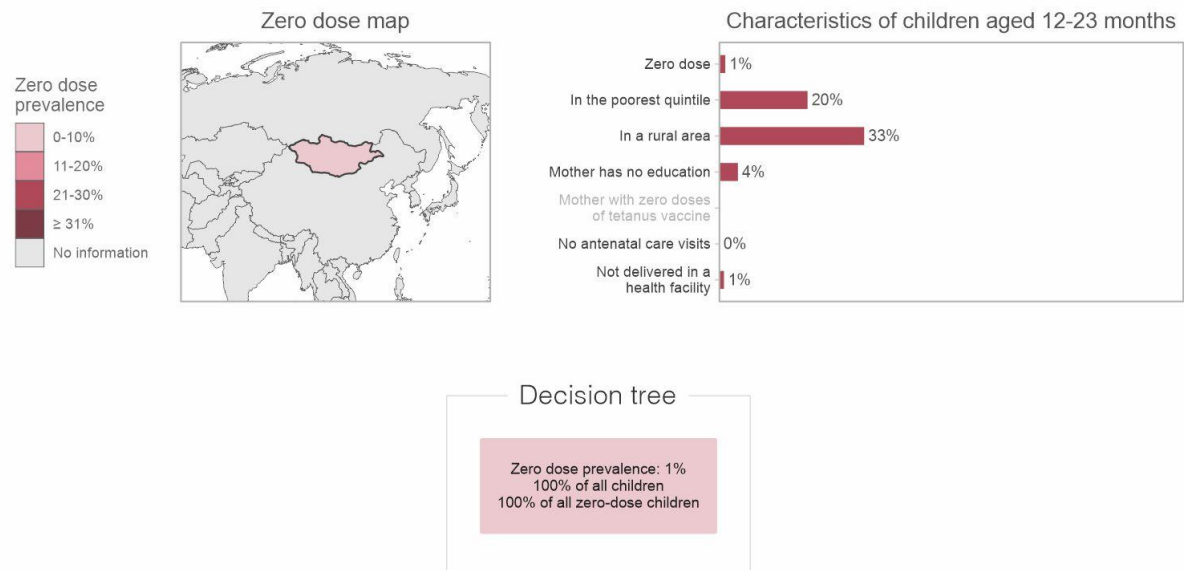

**Figure S56.** – Mongolia’s country profile.

## Montenegro, 2013

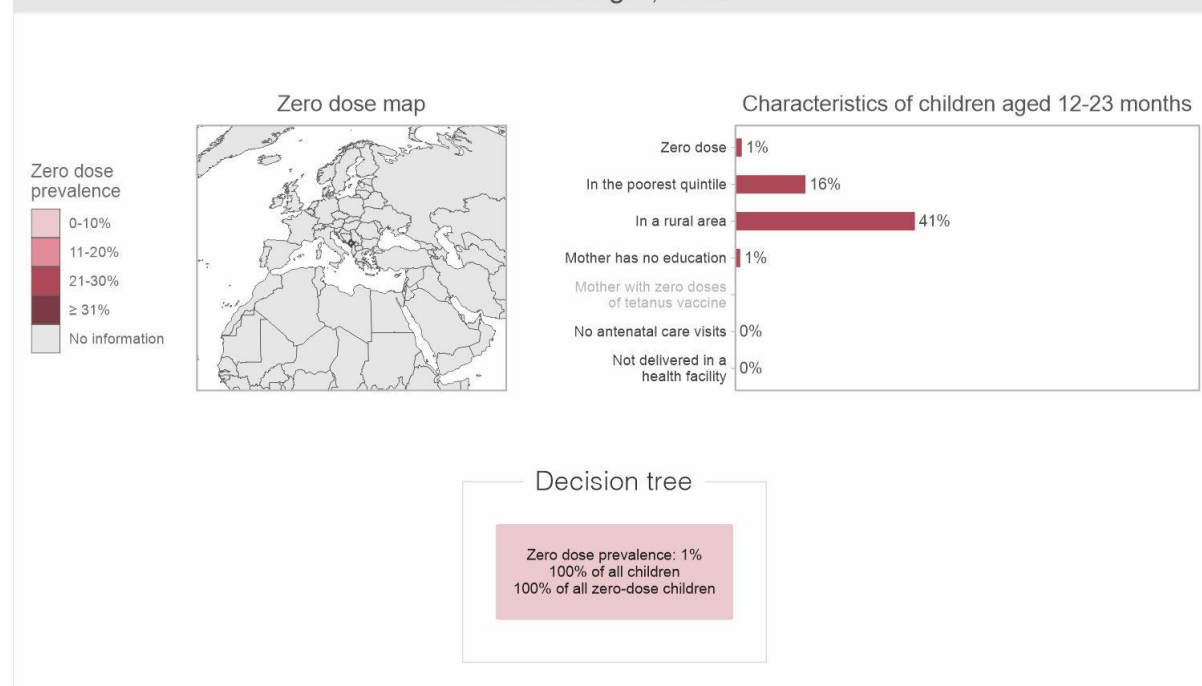

**Figure S57.** – Montenegro's country profile.

## Mozambique, 2015

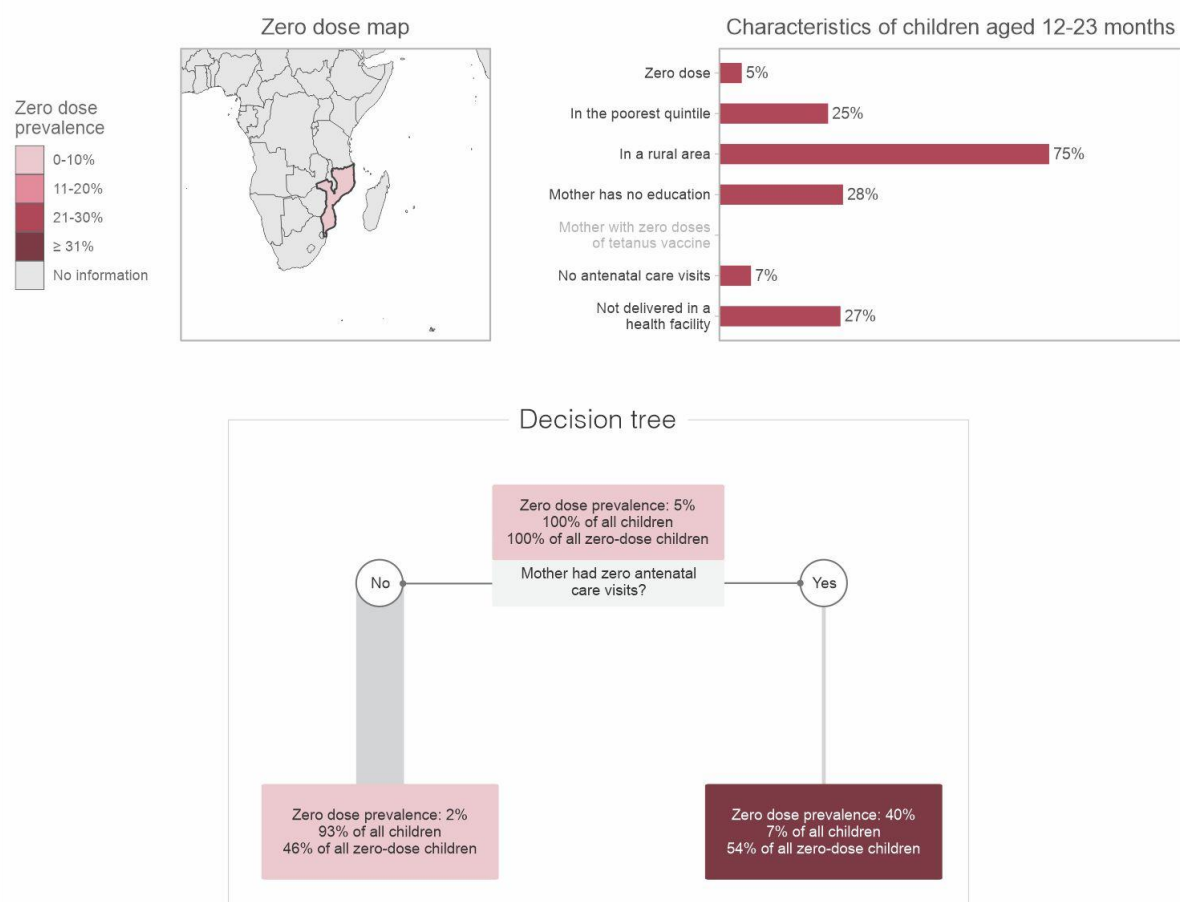

**Figure S58.** – Mozambique's country profile.

## Myanmar, 2015

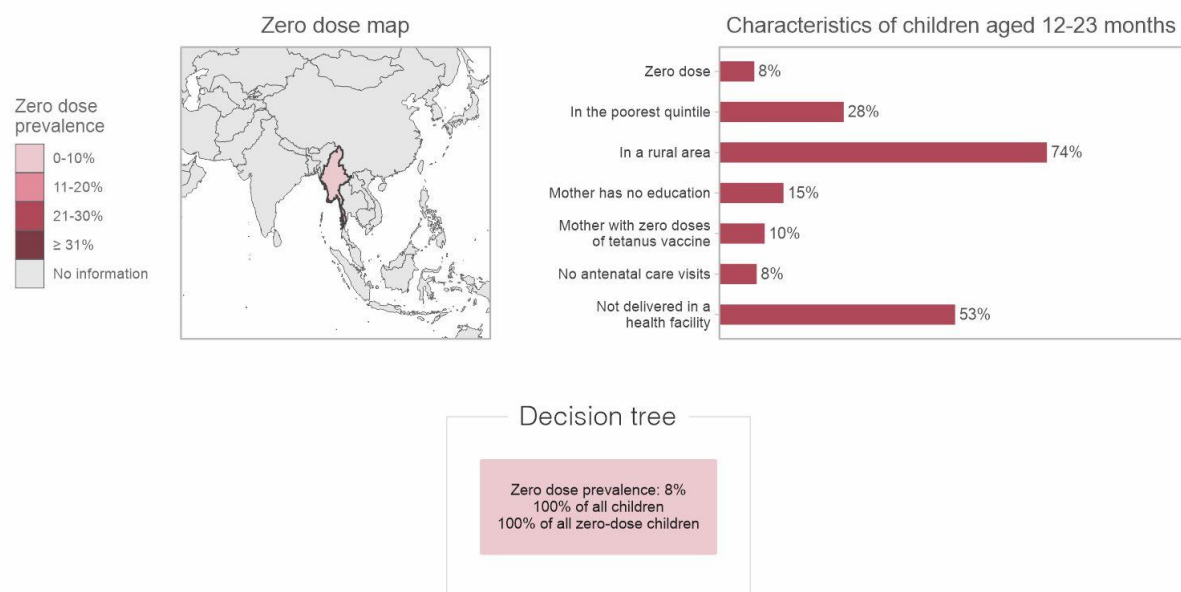

**Figure S59.** – Myanmar's country profile.

## Namibia, 2013

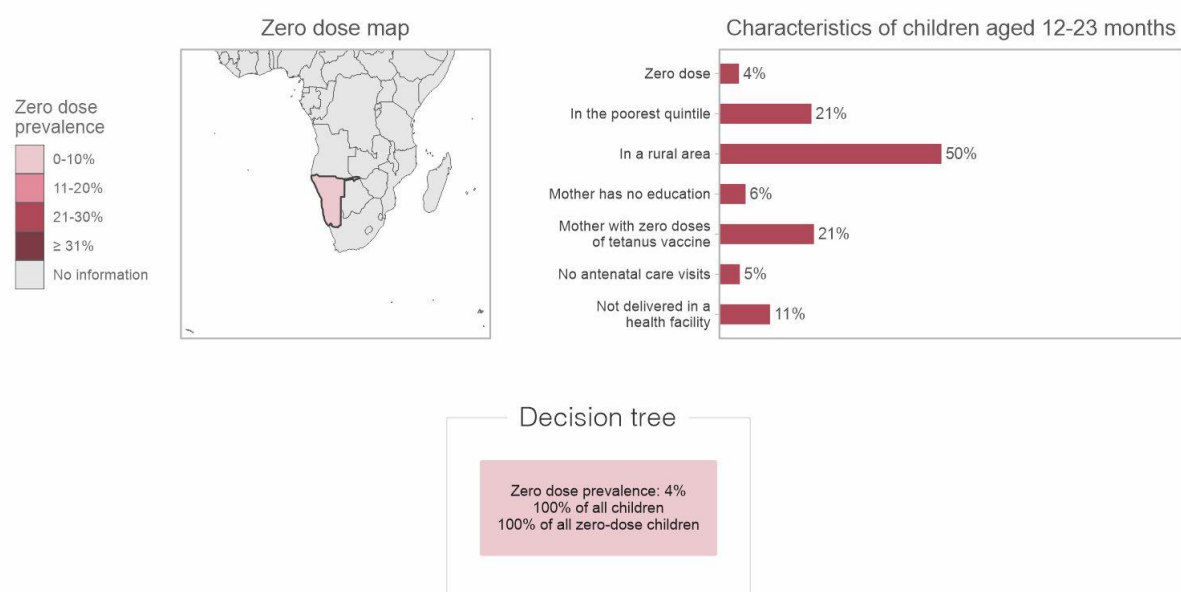

**Figure S60.** – Namibia's country profile.



## Nepal, 2016

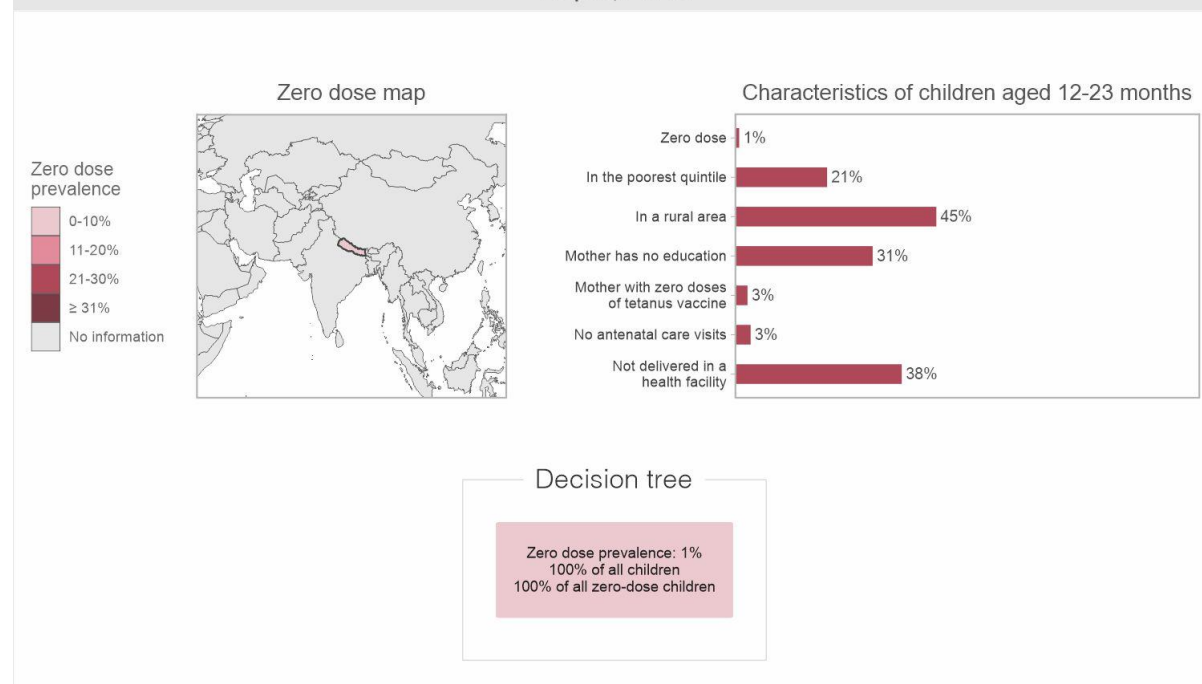

**Figure S61.** – Nepal’s country profile.

## Niger, 2012

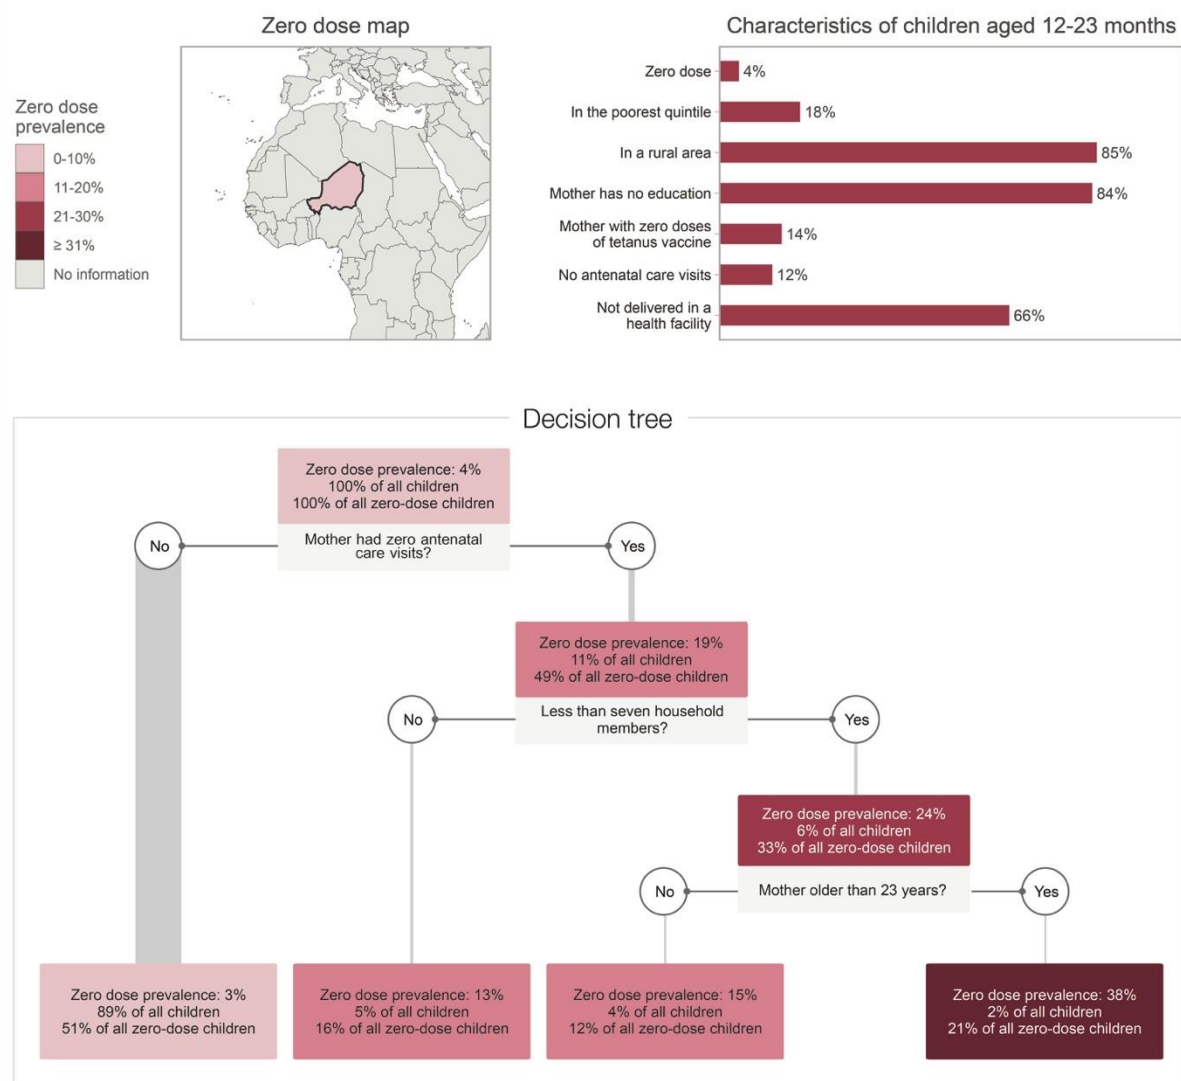

**Figure S62.** – Niger's country profile.

## Nigeria, 2018

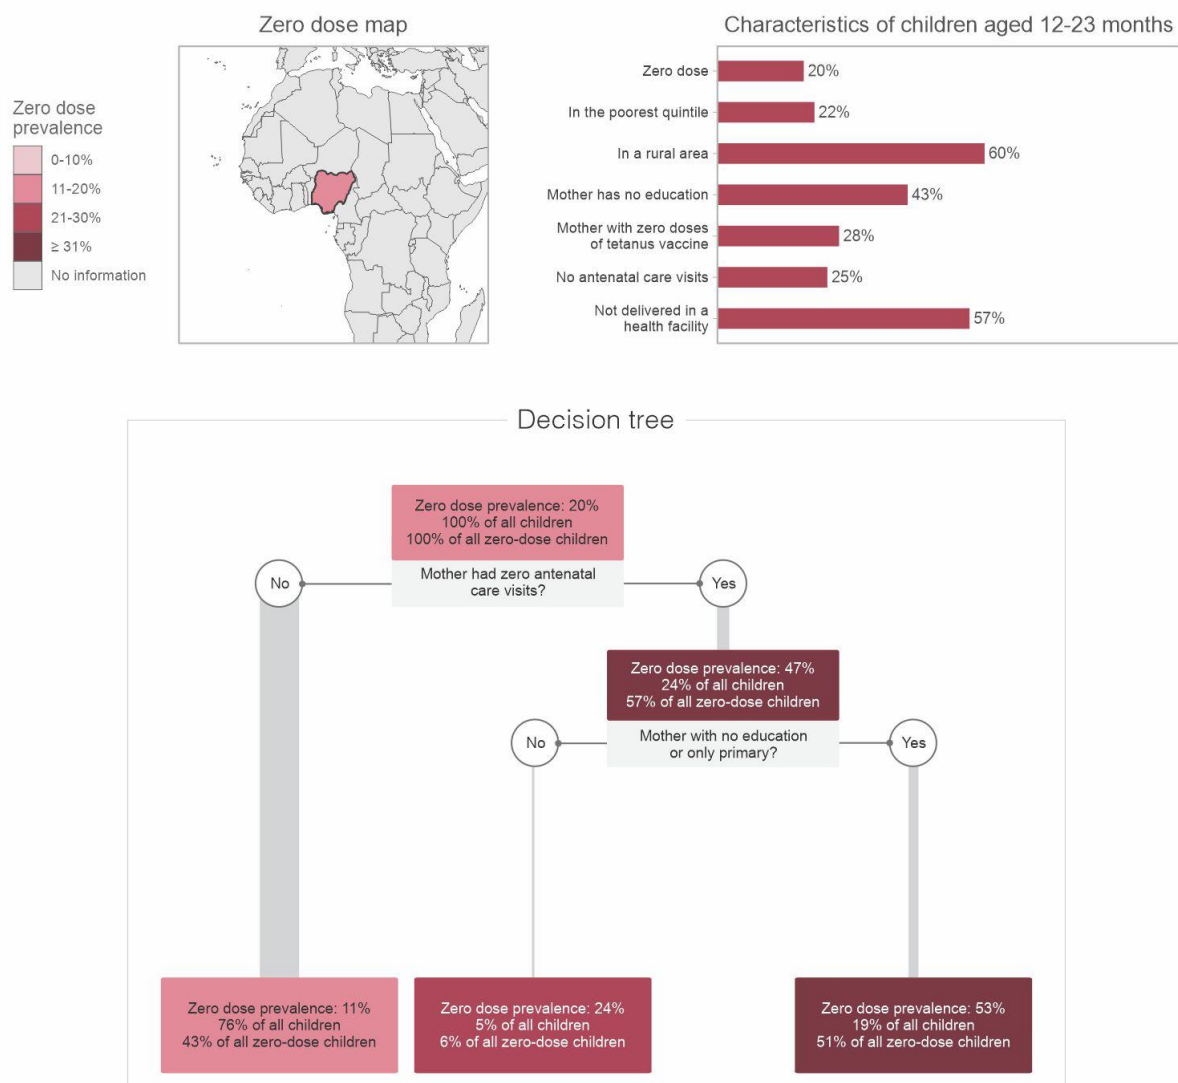

Figure S63. – Nigeria's country profile.

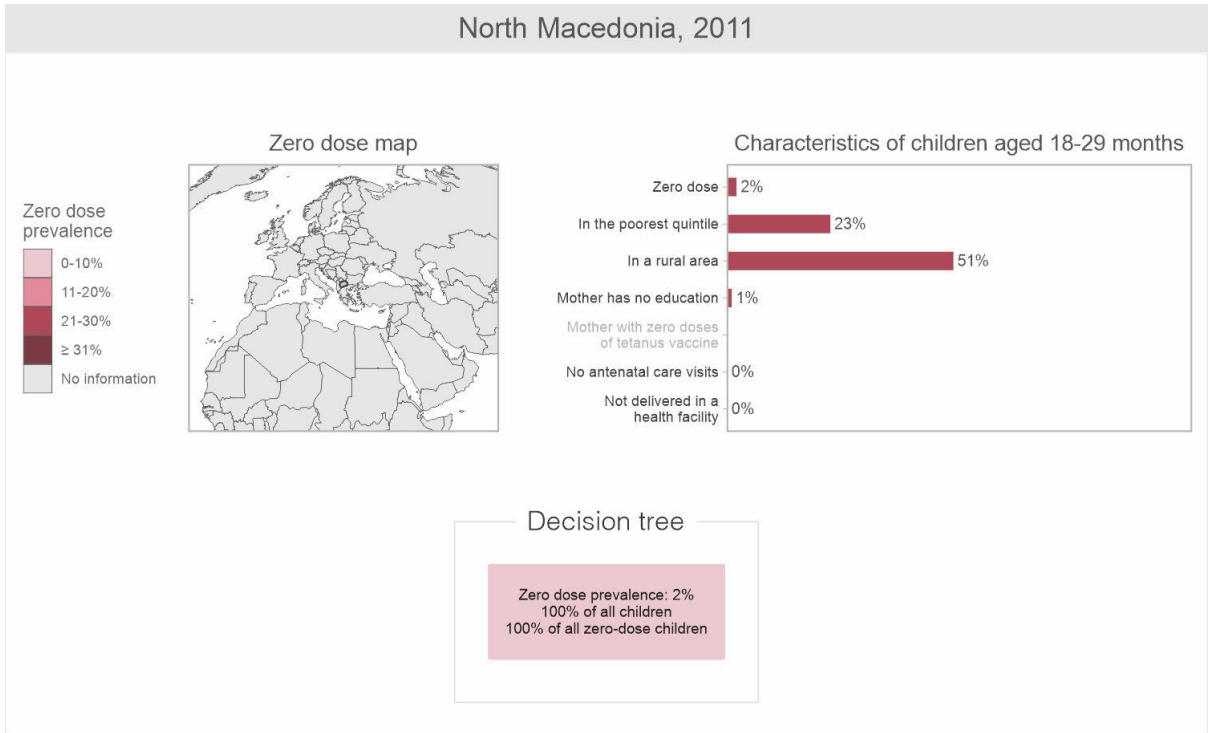

**Figure S64.** – North Macedonia’s country profile.

## Pakistan, 2017

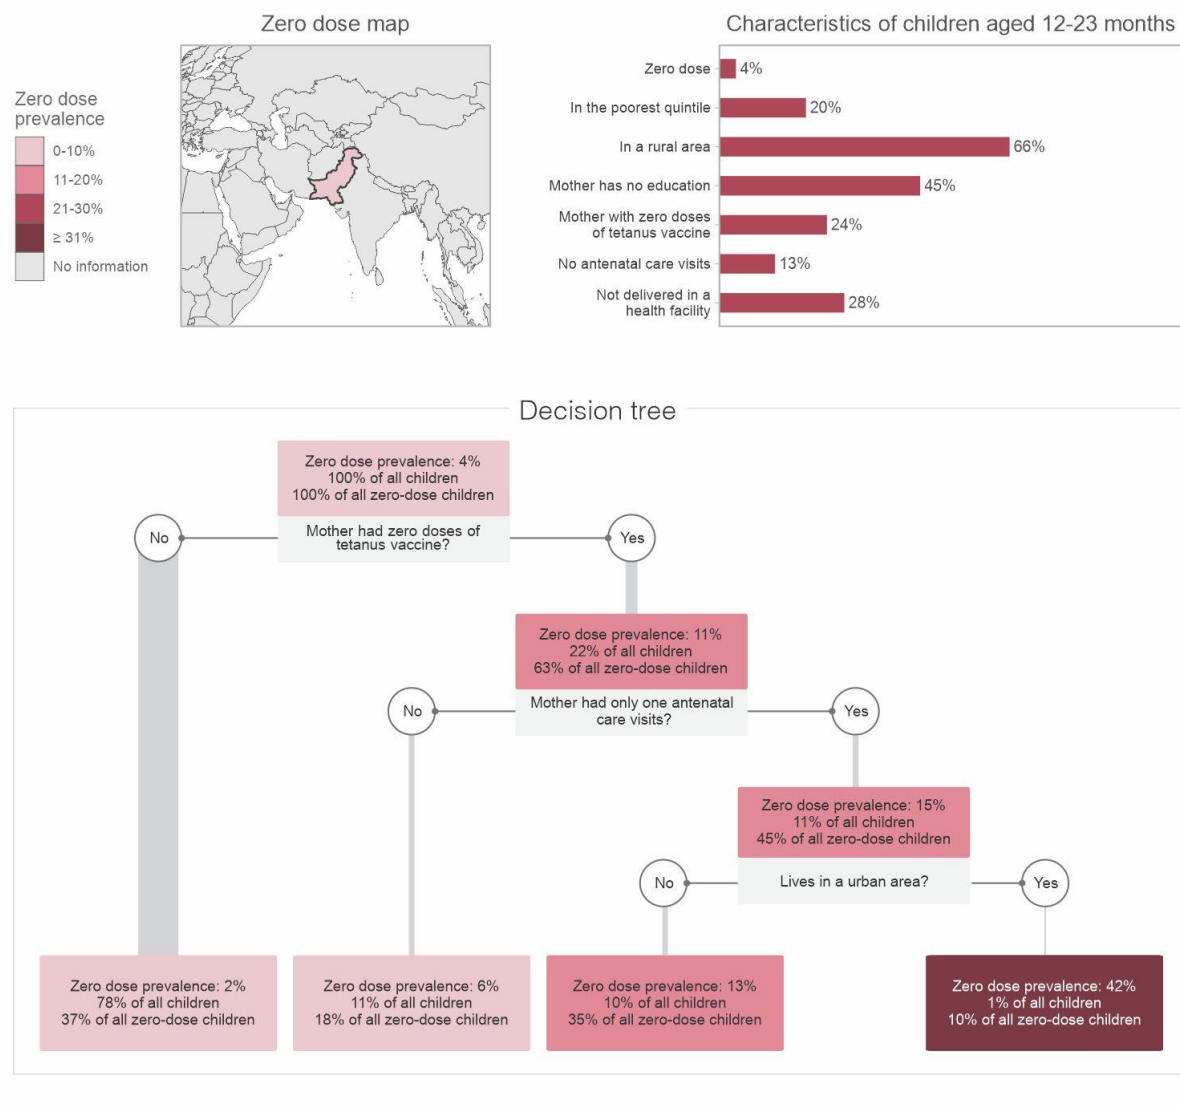

Figure S65. – Pakistan's country profile.

## Panama, 2013

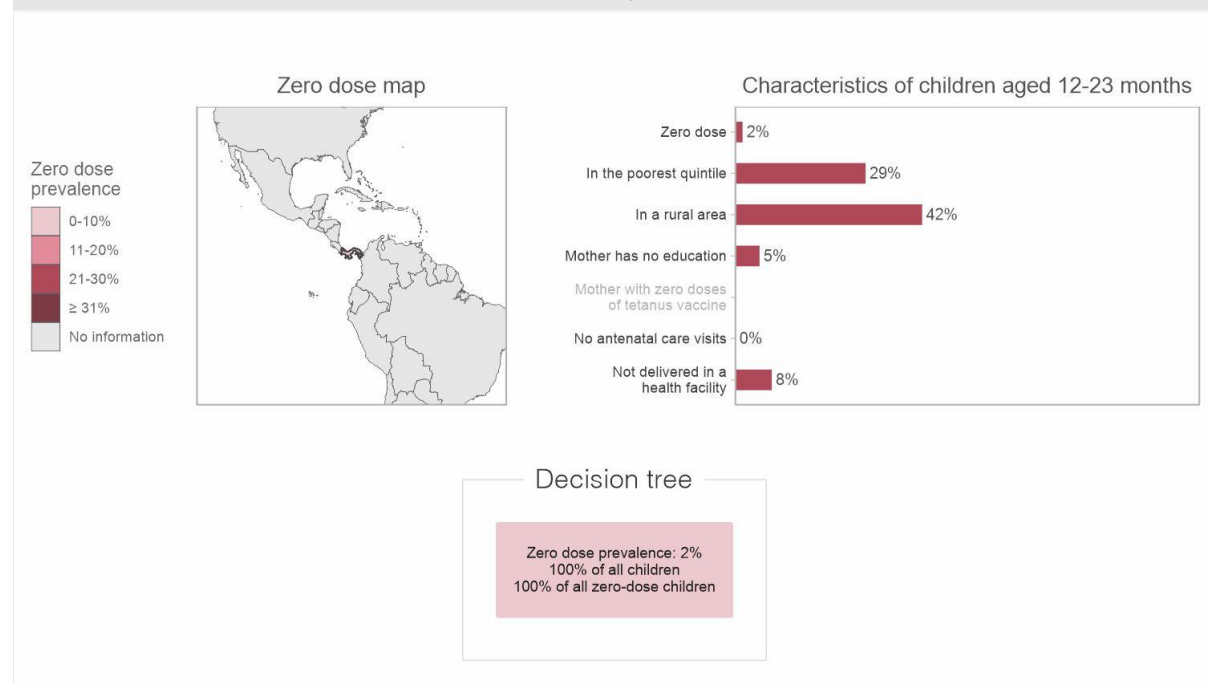

**Figure S66.** – Panama’s country profile.

## Papua New Guinea, 2016

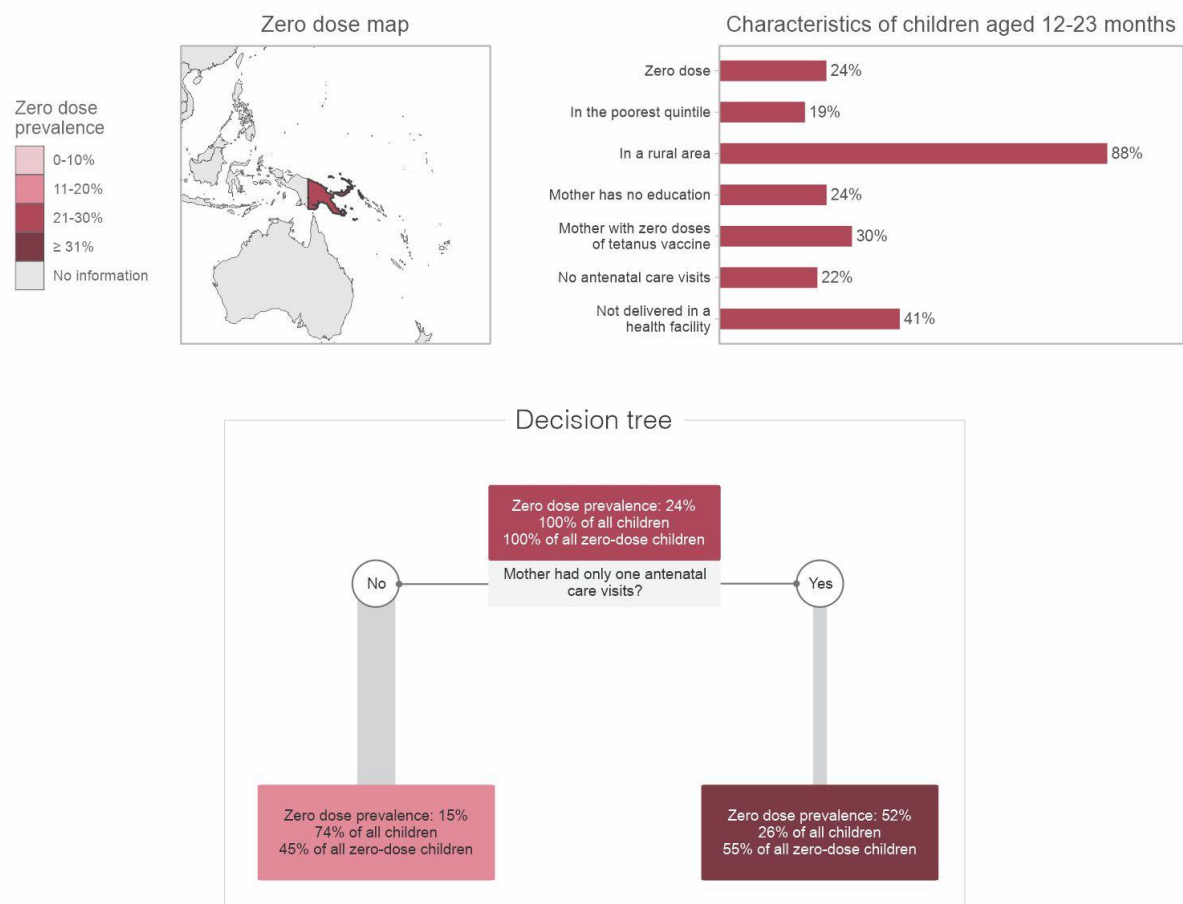

**Figure S67.** – Papua New Guinea’s country profile.

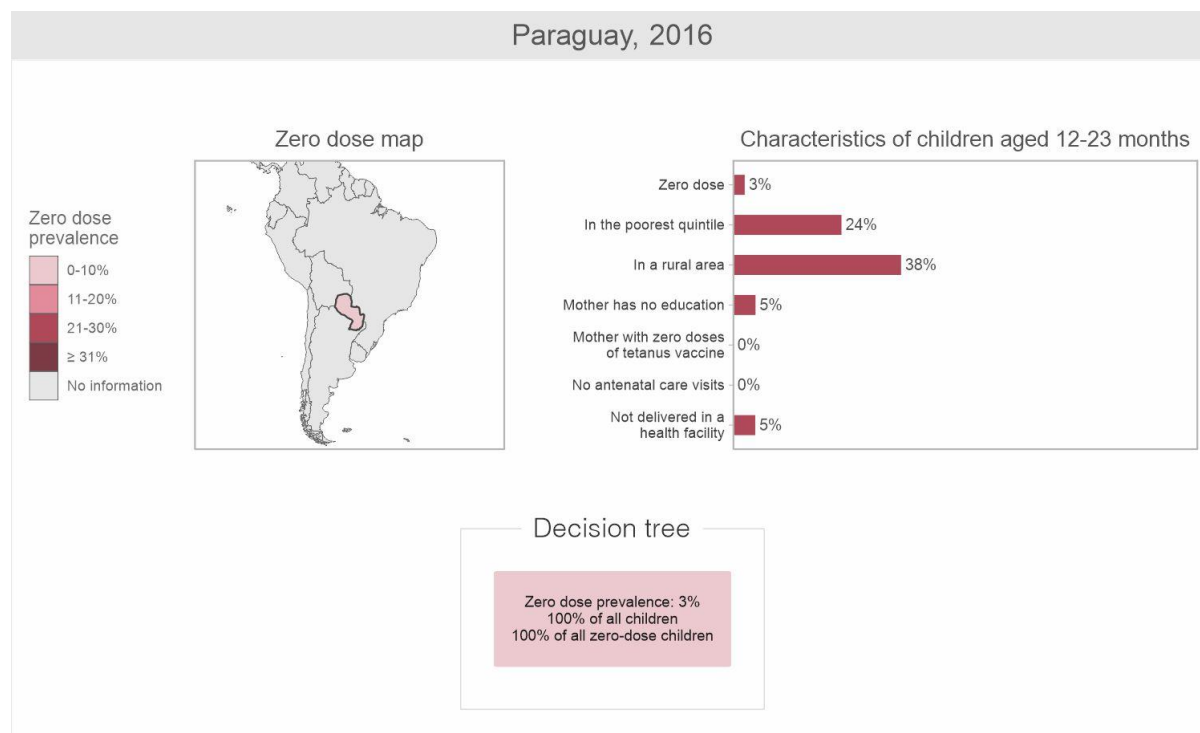

**Figure S68.** – Paraguay’s country profile.

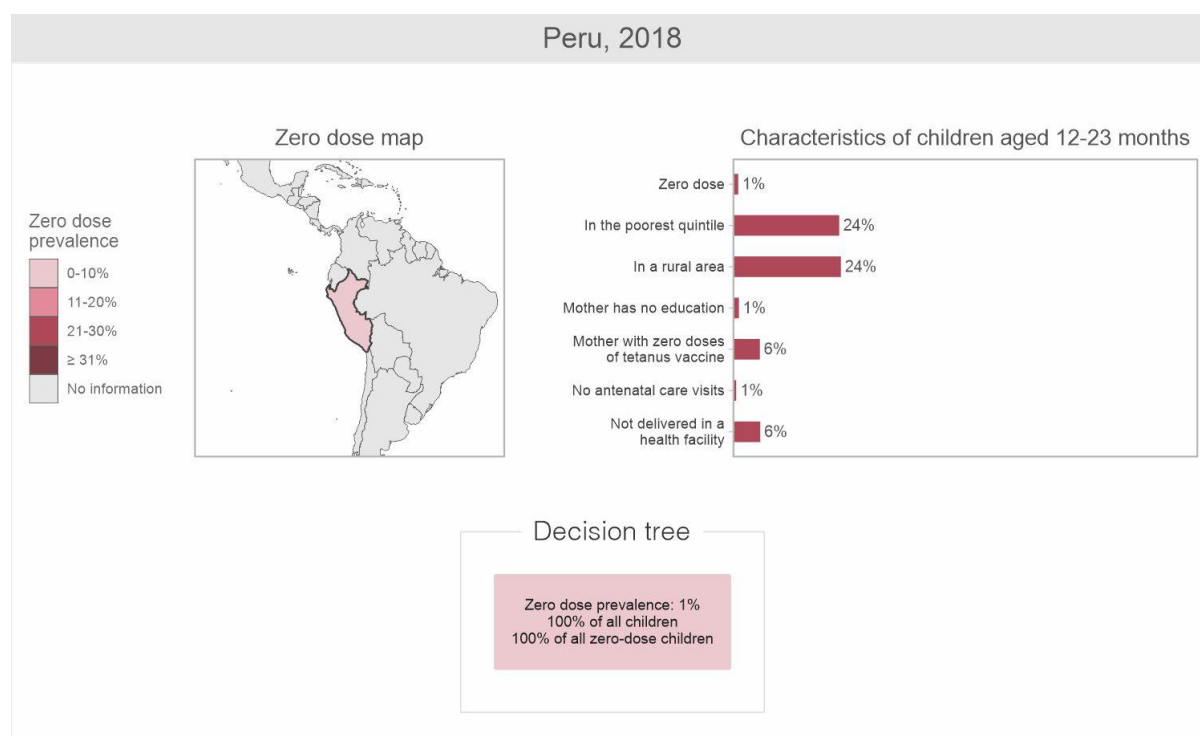

**Figure S69.** – Peru’s country profile.



# Philippines, 2017

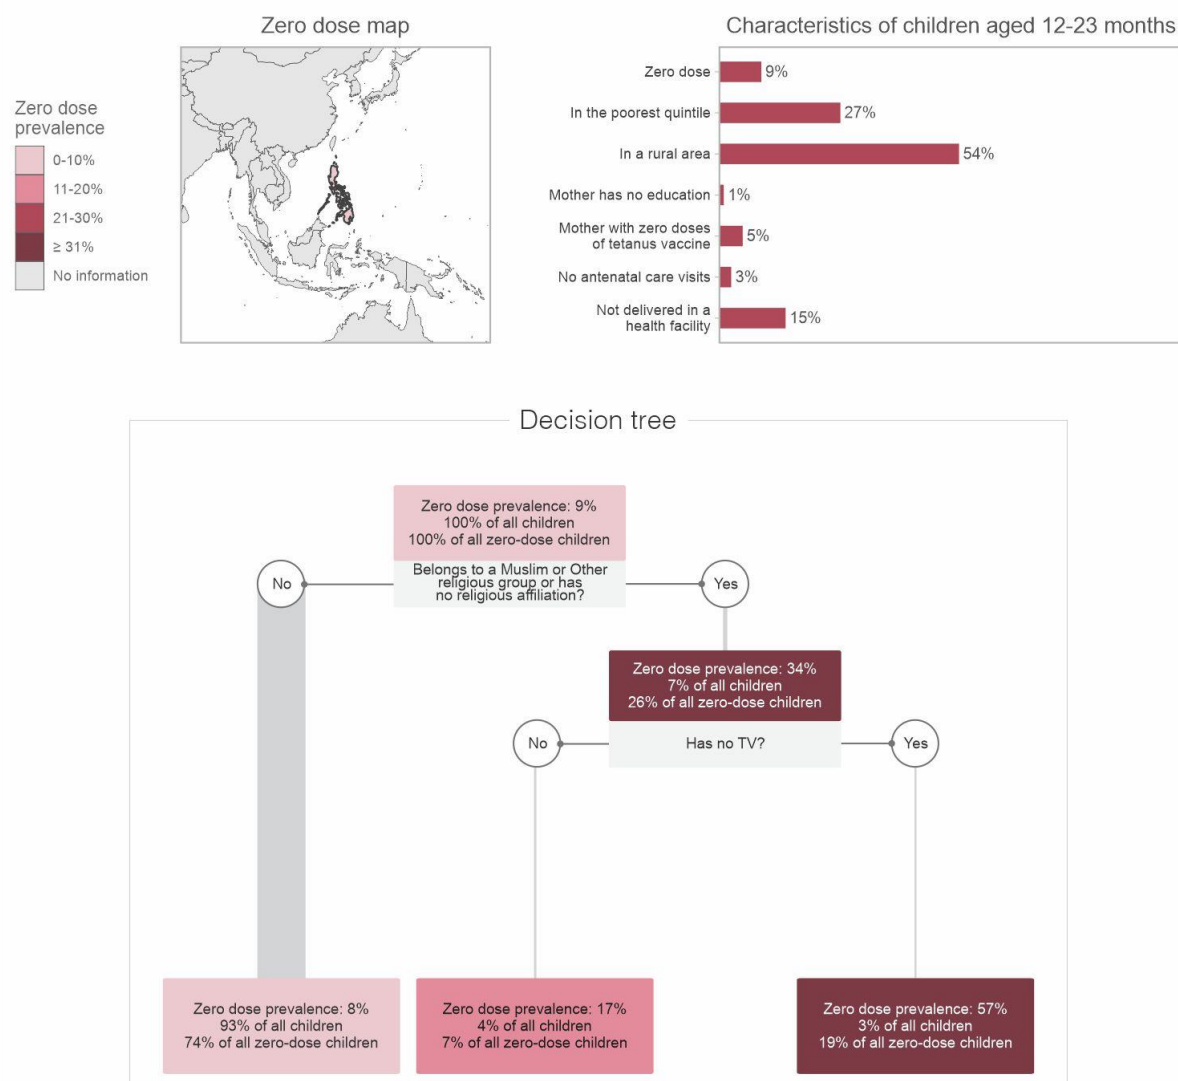

**Figure S70.** – Philippines' country profile.

## Rwanda, 2014

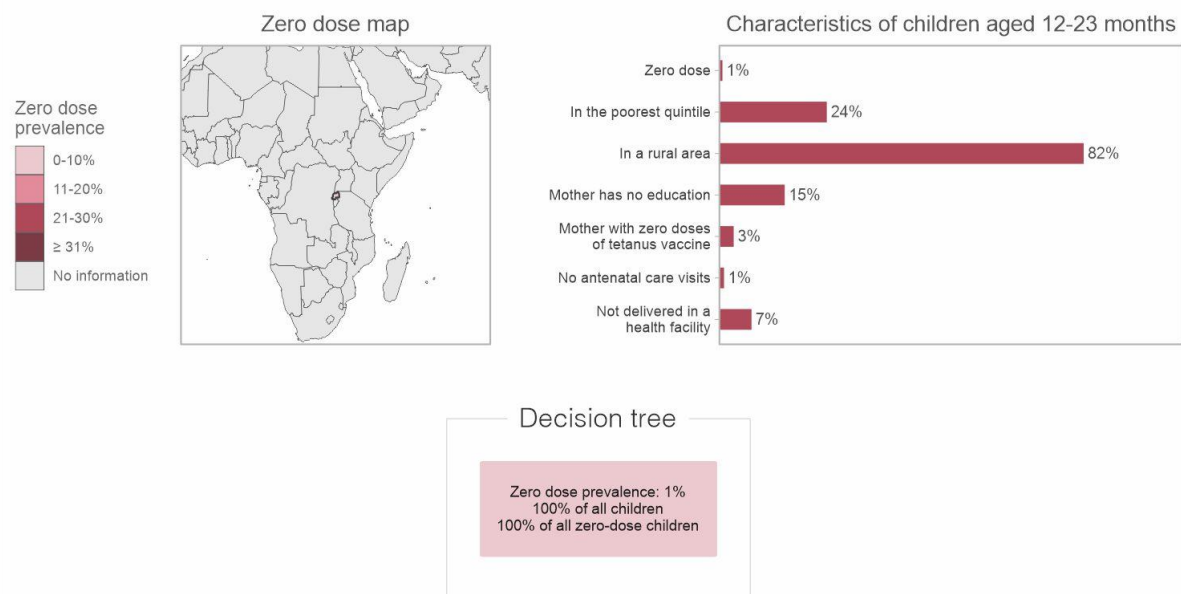

**Figure S71.** – Rwanda’s country profile.

## São Tomé and Príncipe, 2014

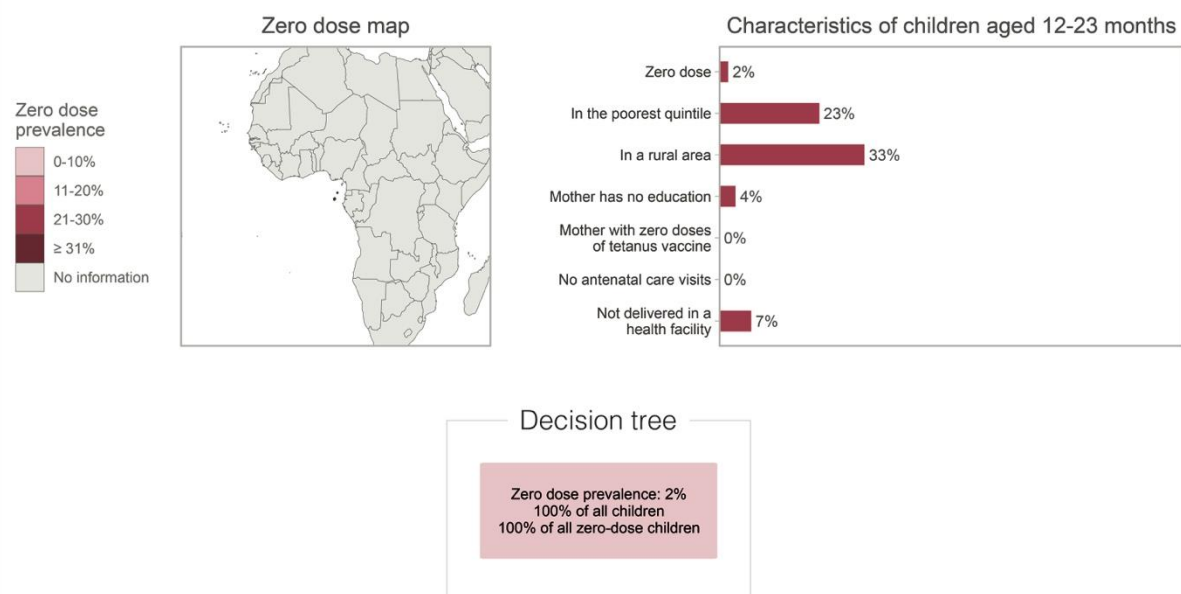

**Figure S72.** – São Tomé and Príncipe’s country profile.

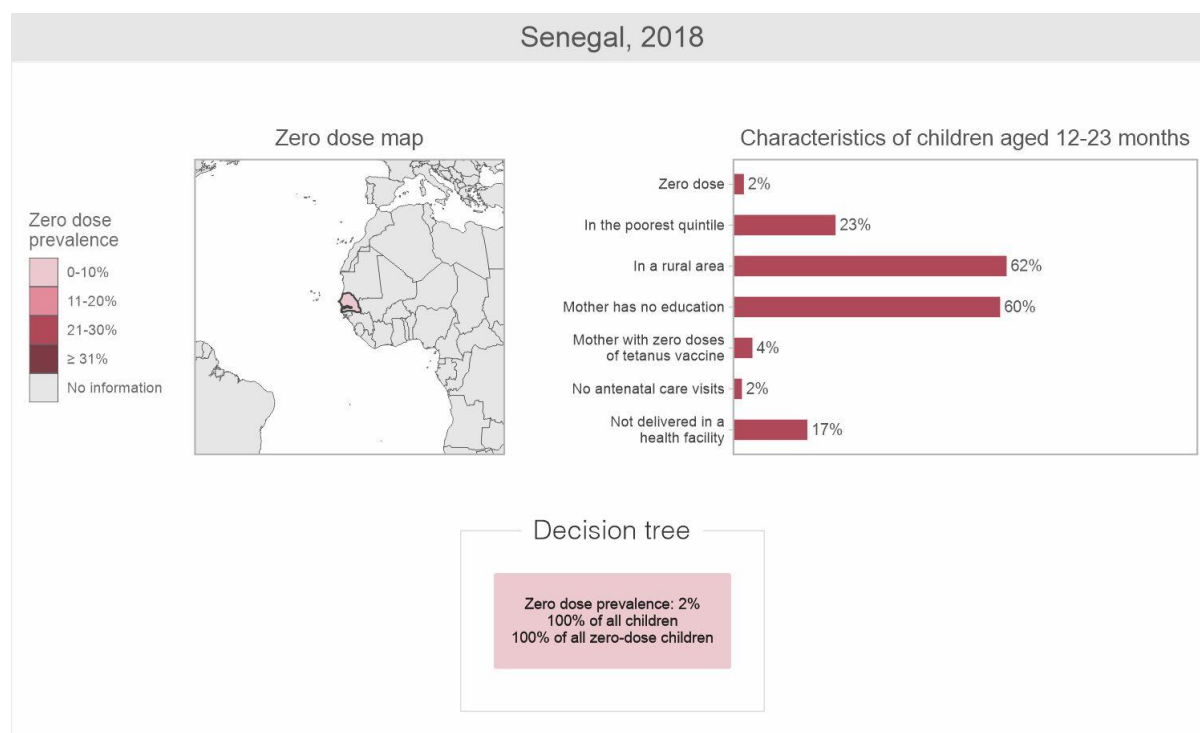

**Figure S73. – Senegal’s country profile.**

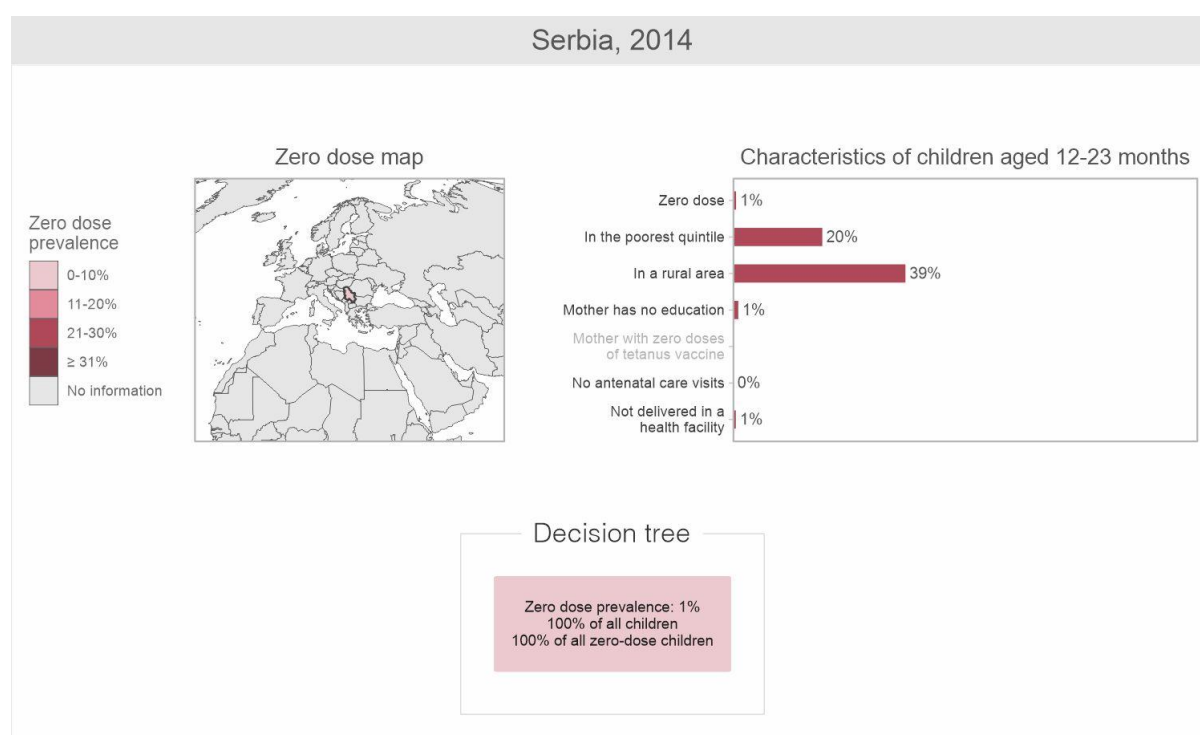

**Figure S74. – Serbia’s country profile.**

## Sierra Leone, 2017

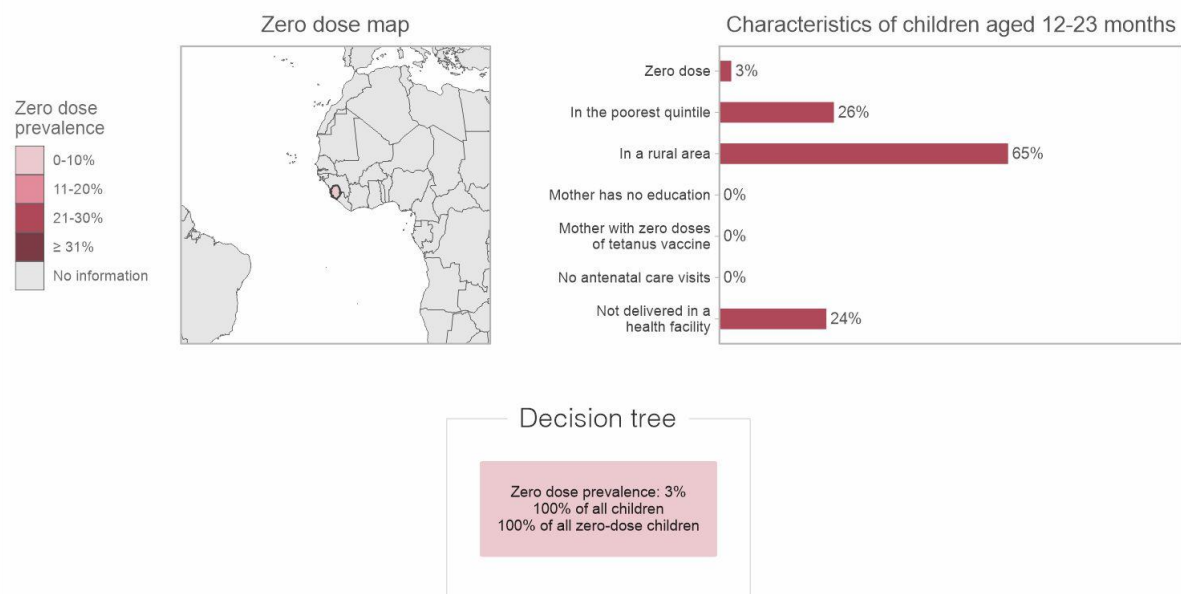

**Figure S75.** – Sierra Leone’s country profile.

## South Africa, 2016

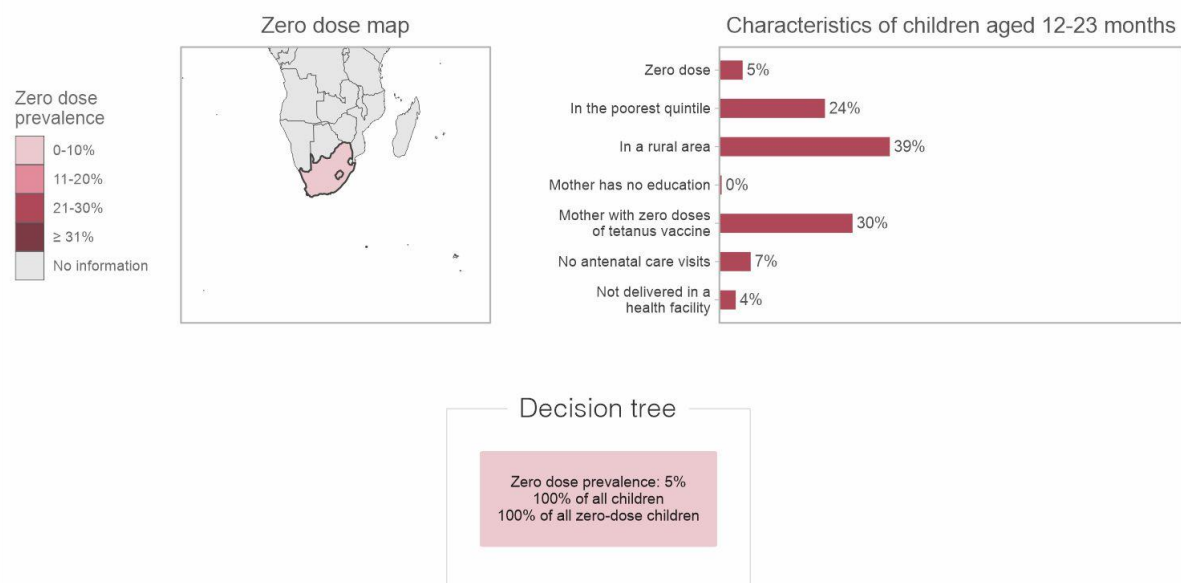

**Figure S76.** – South Africa’s country profile.

## South Sudan, 2010

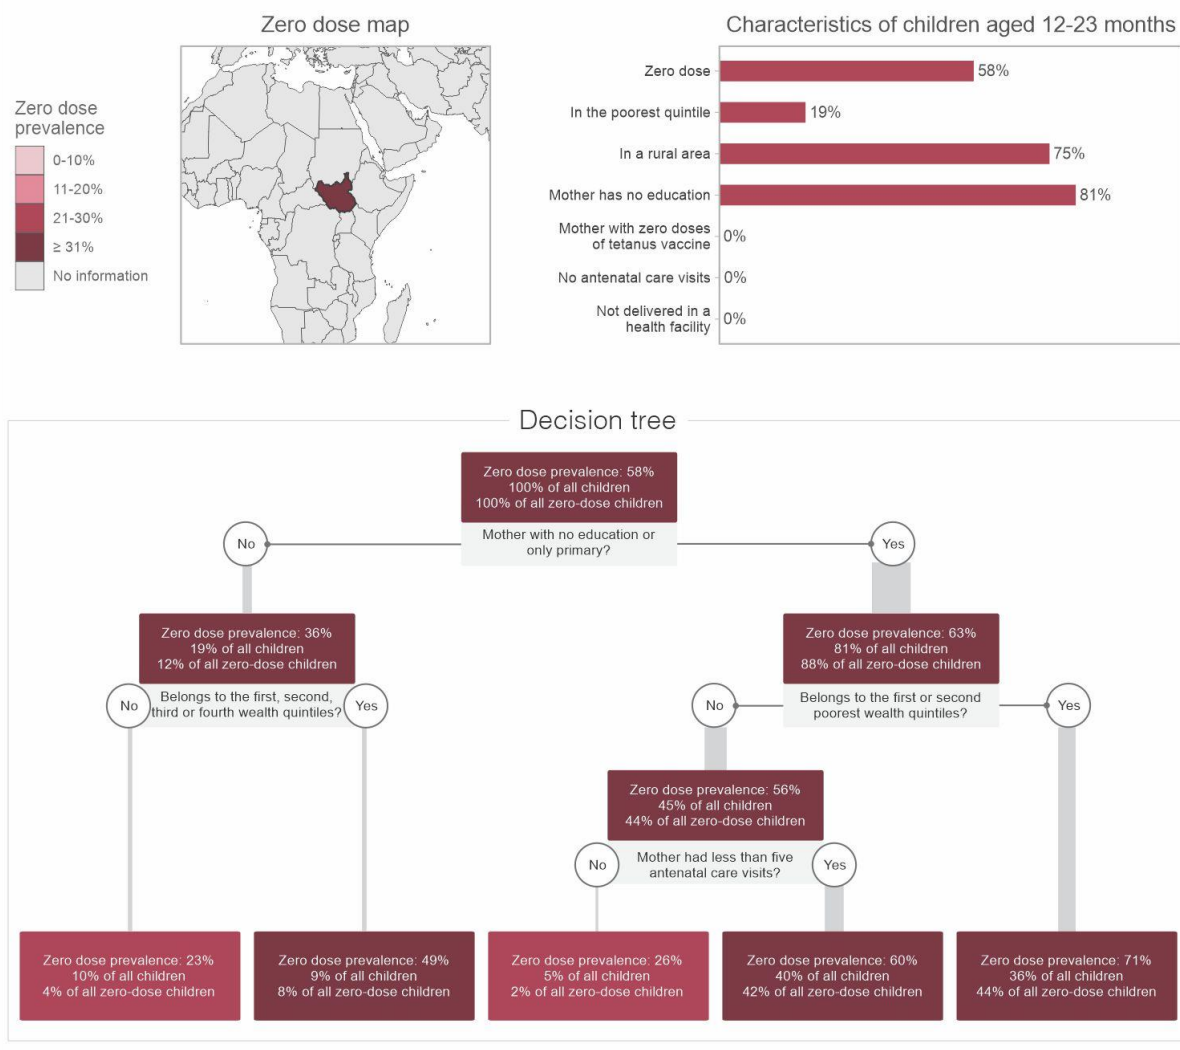

Figure S77. – South Sudan's country profile.

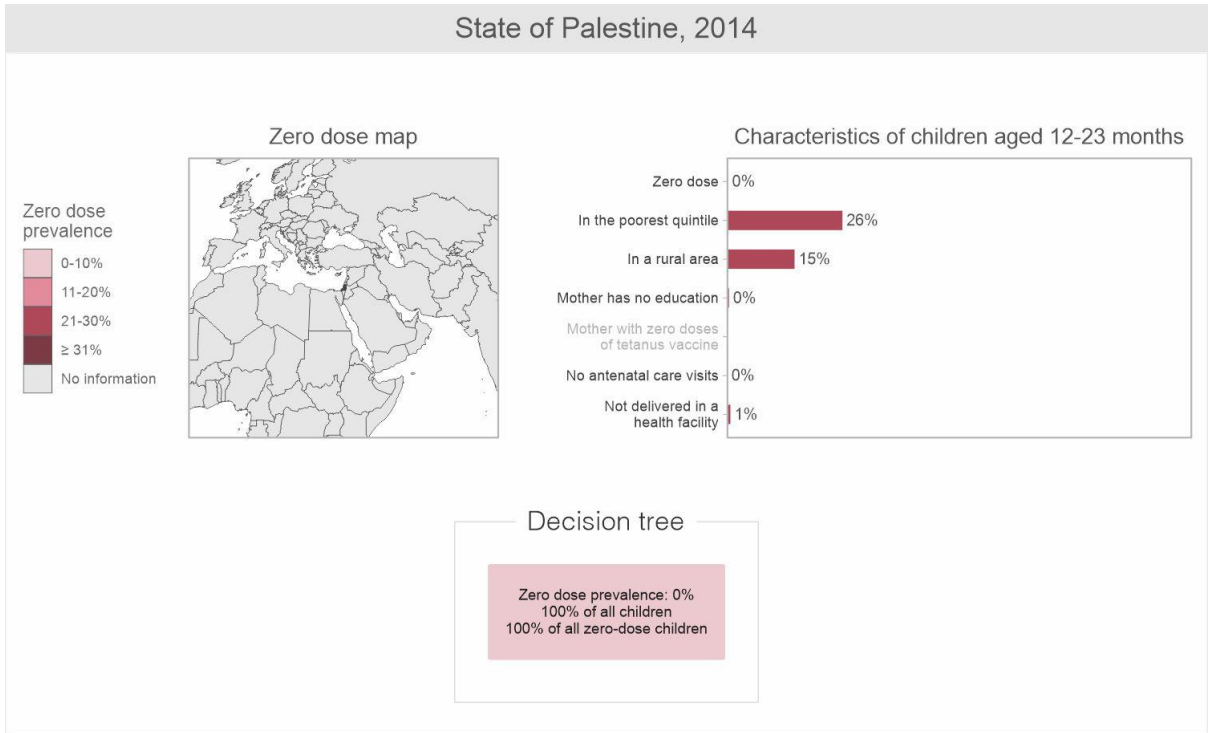

**Figure S78.** – State of Palestine’s country profile.

## Sudan, 2014

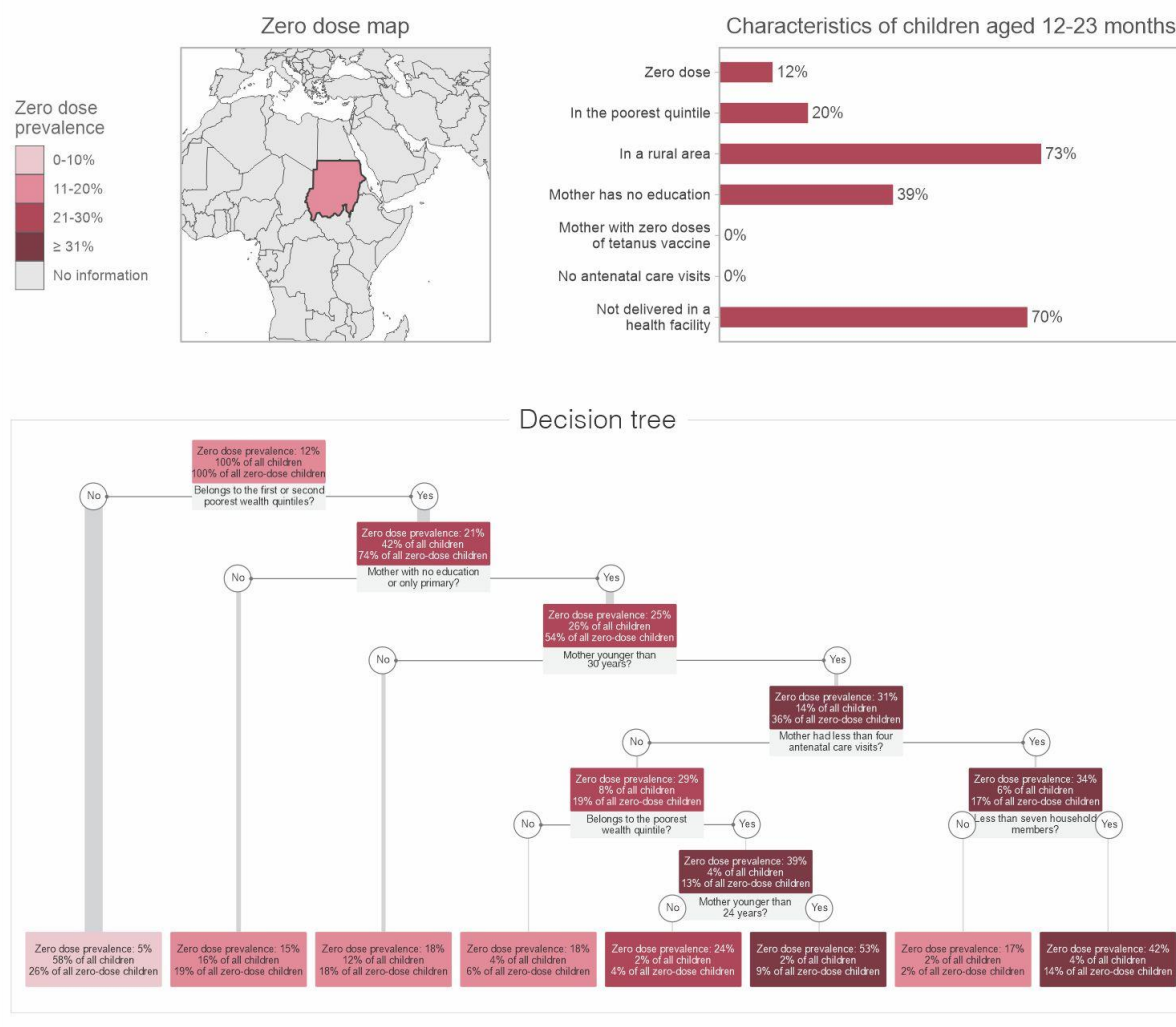

Figure S79. – Sudan's country profile.

## Tajikistan, 2017

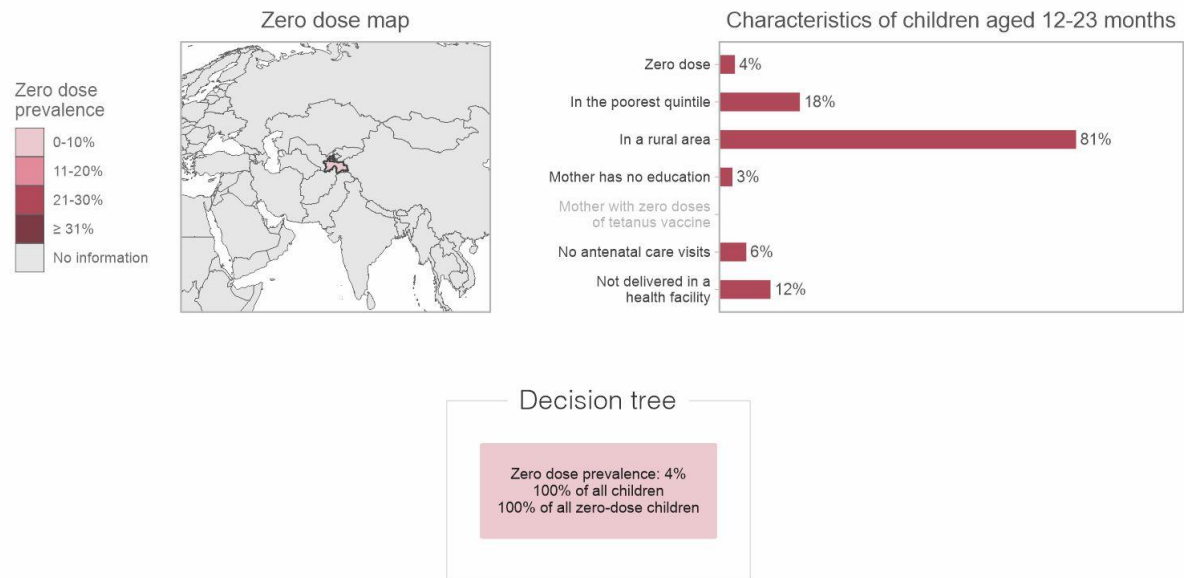

Figure S80. – Tajikistan’s country profile.

## Tanzania, 2015

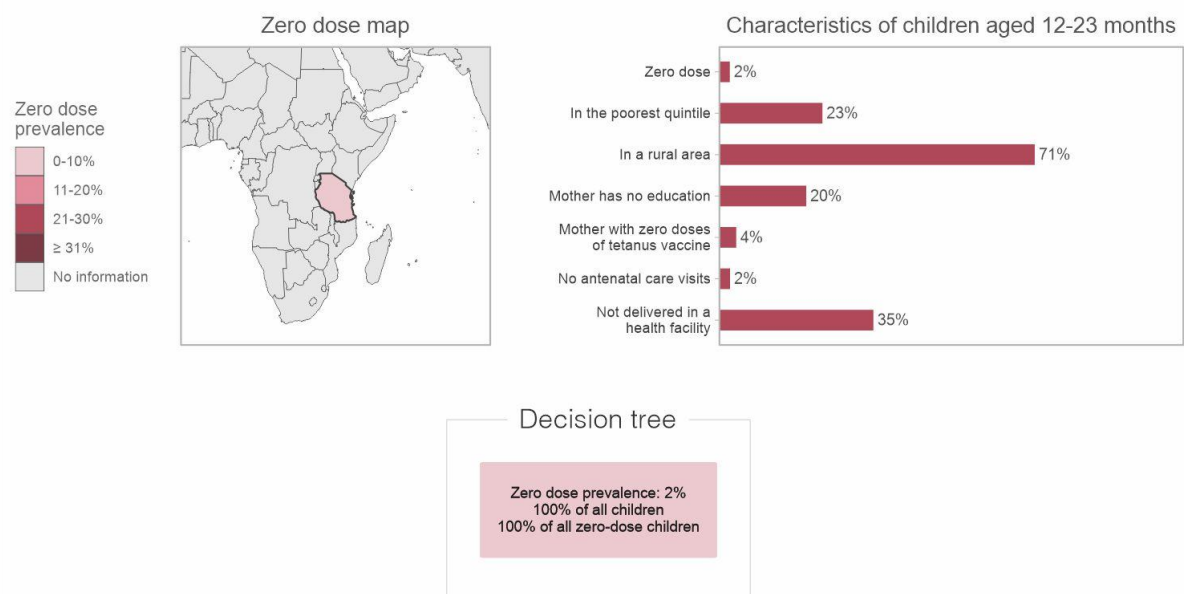

Figure S81. – Tanzania’s country profile.



## Thailand, 2015

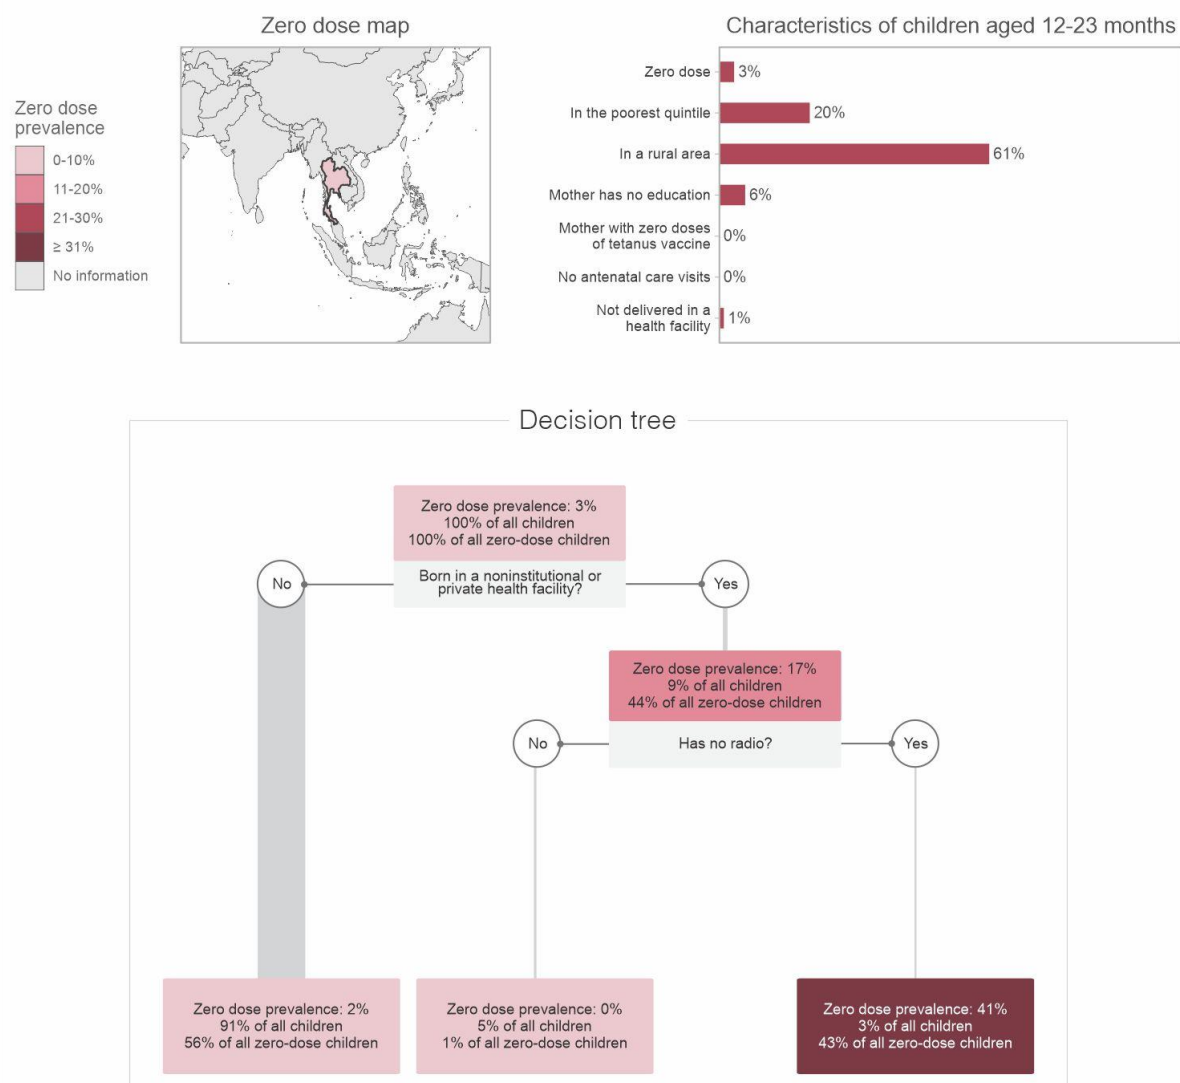

**Figure S82.** – Thailand's country profile.

# Timor-Leste, 2016

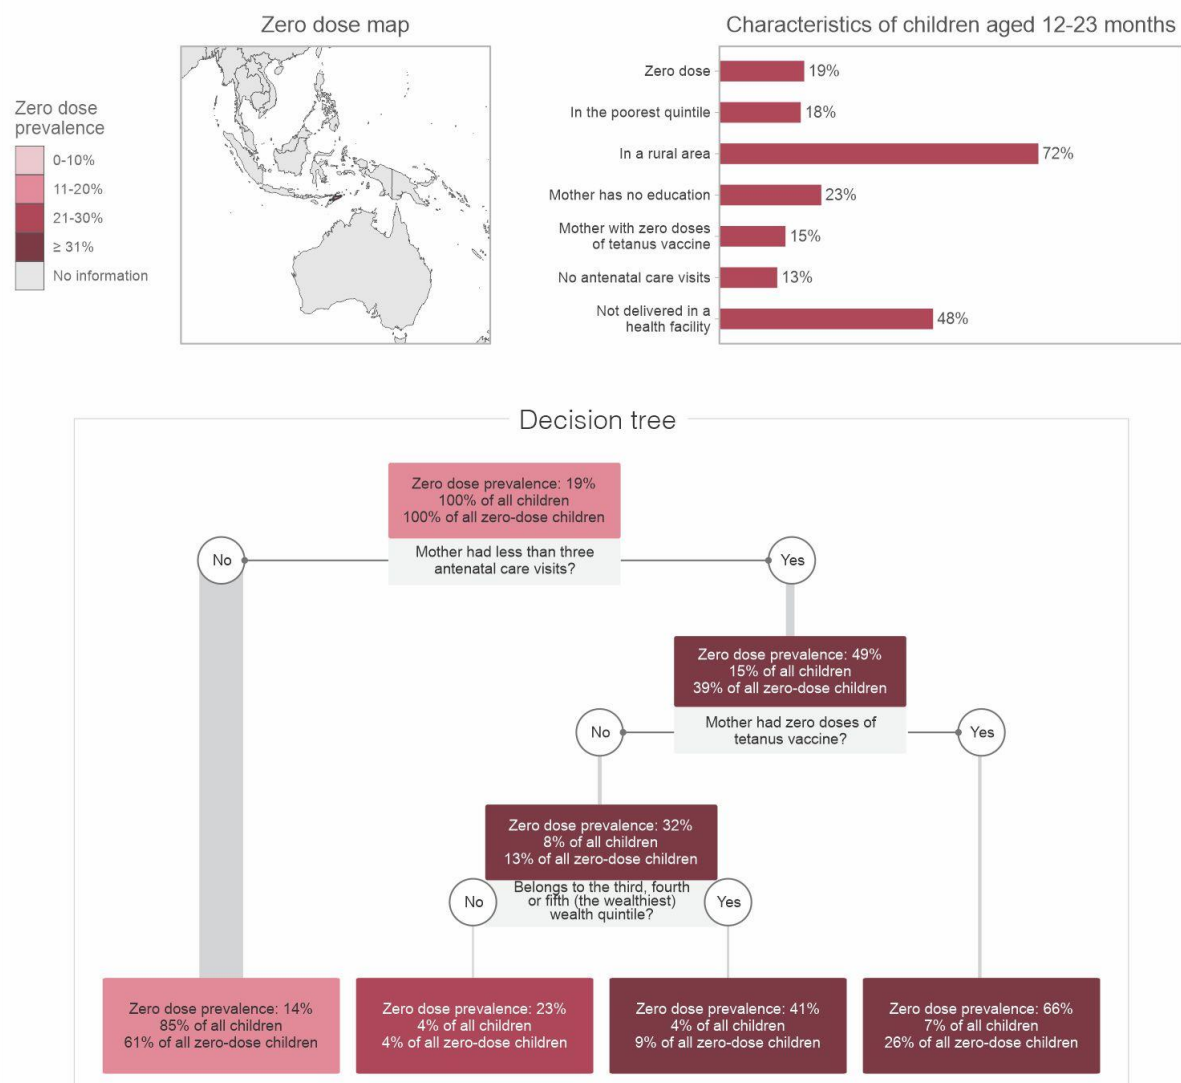

**Figure S83.** – Timor-Leste’s country profile.

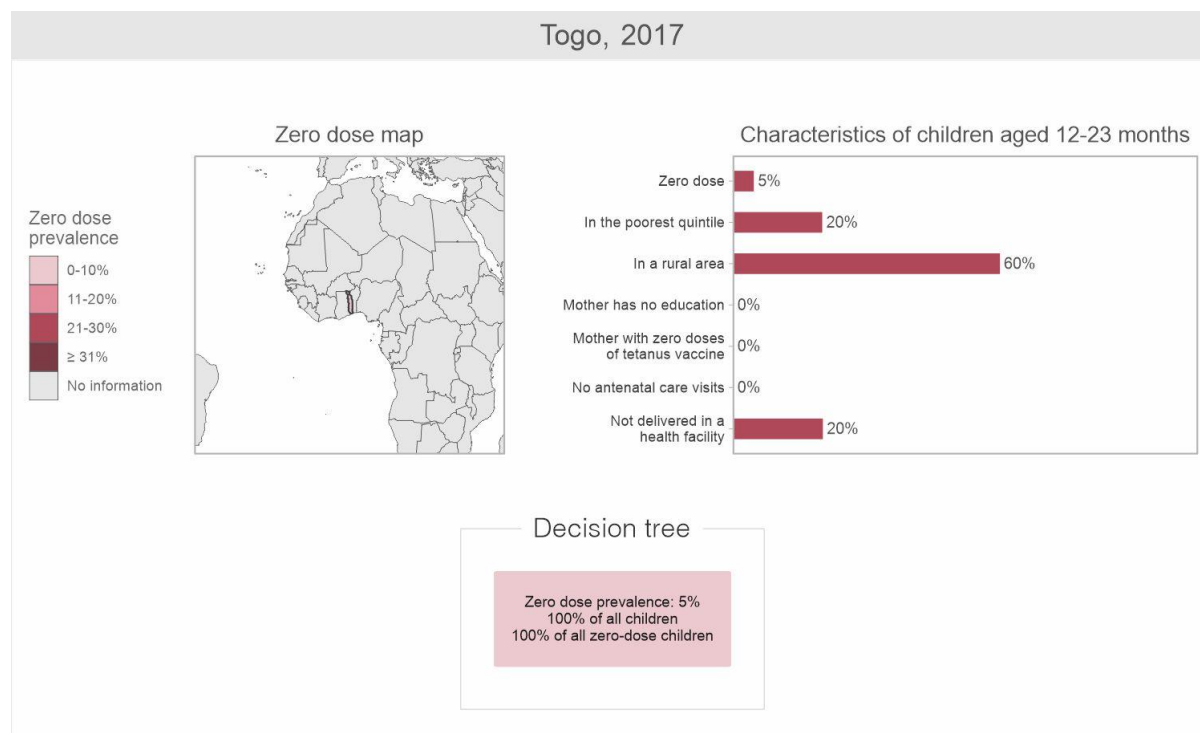

**Figure S84.** – Togo’s country profile.

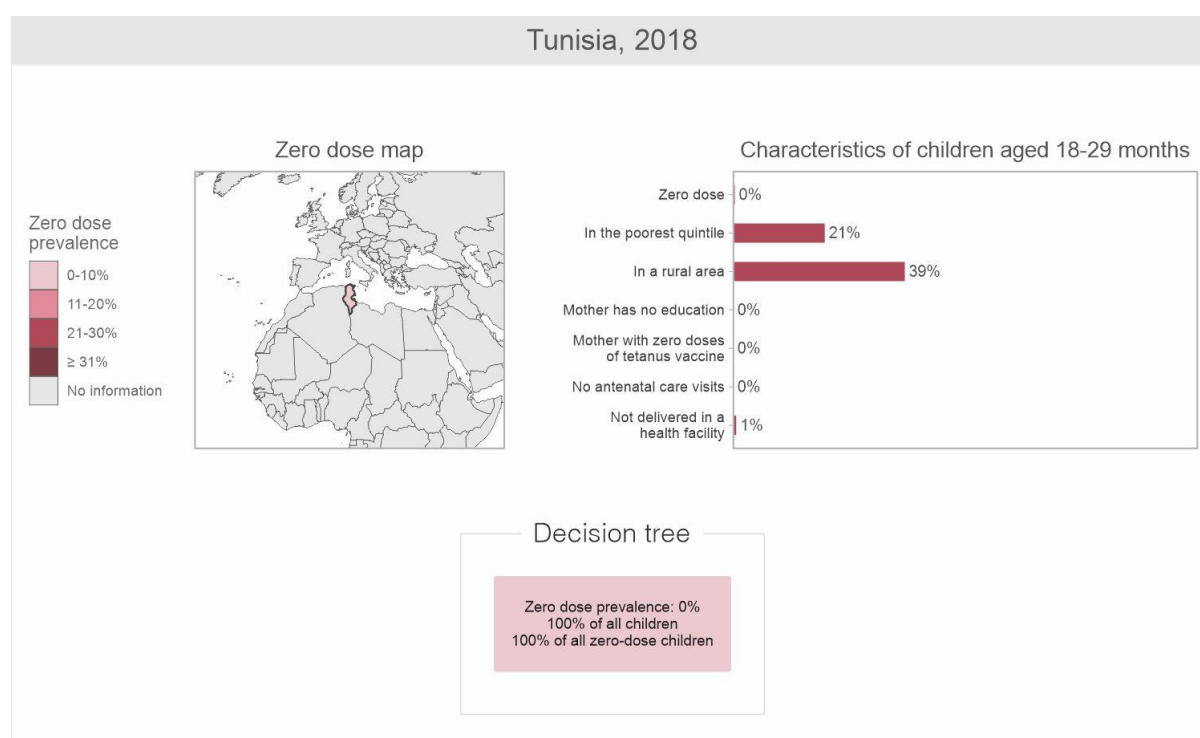

**Figure S85.** – Tunisia’s country profile.

## Turkmenistan, 2015

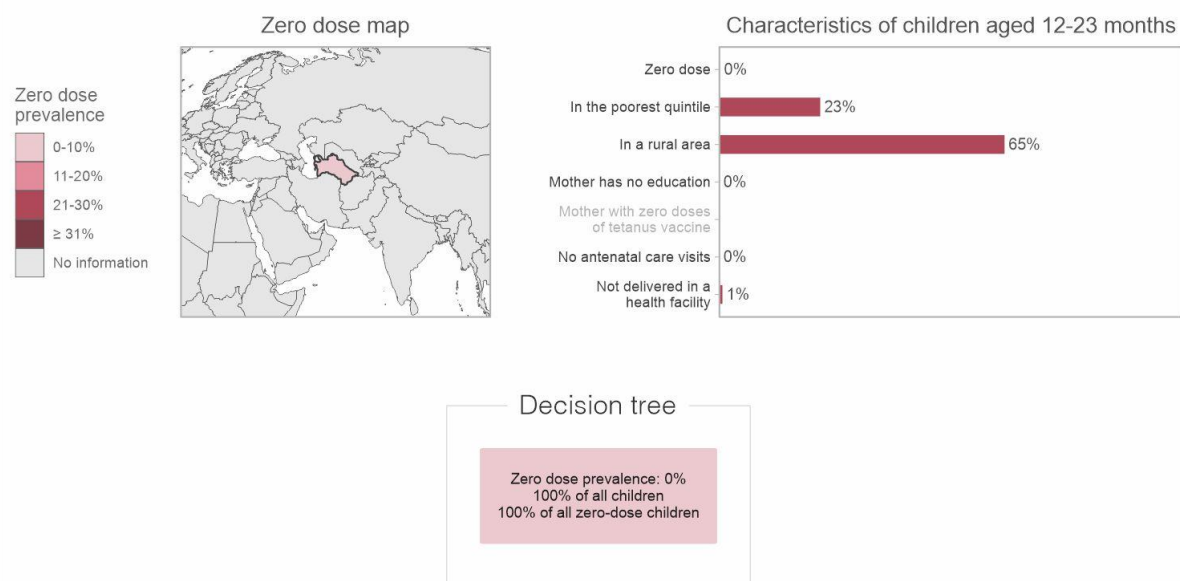

**Figure S86.** – Turkmenistan’s country profile.

## Uganda, 2016

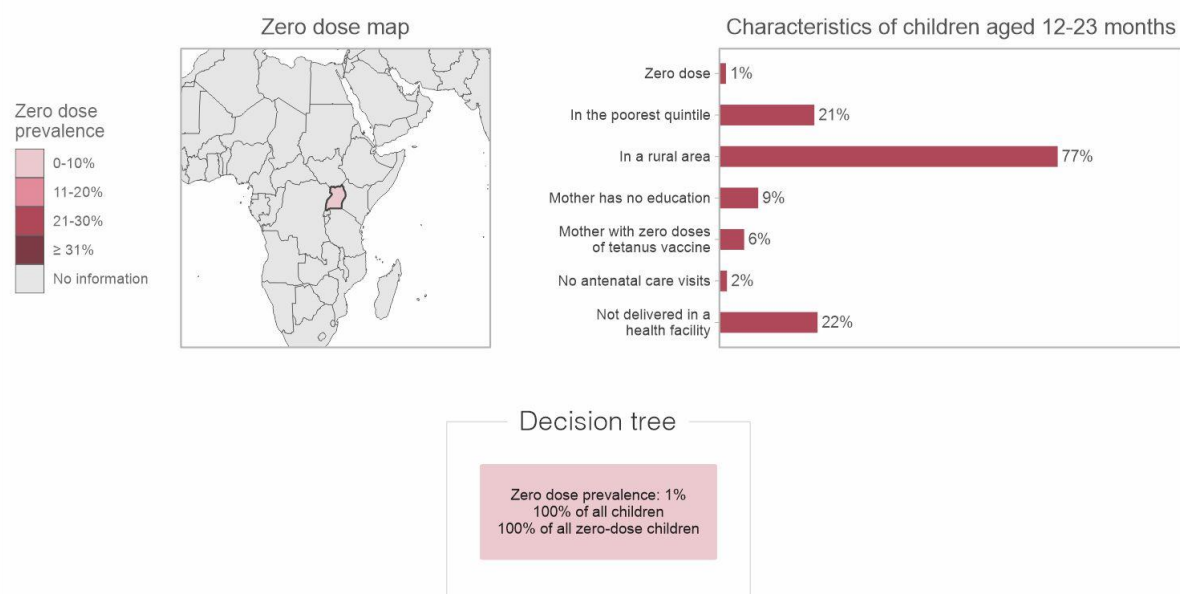

**Figure S87.** – Uganda’s country profile.

## Ukraine, 2012

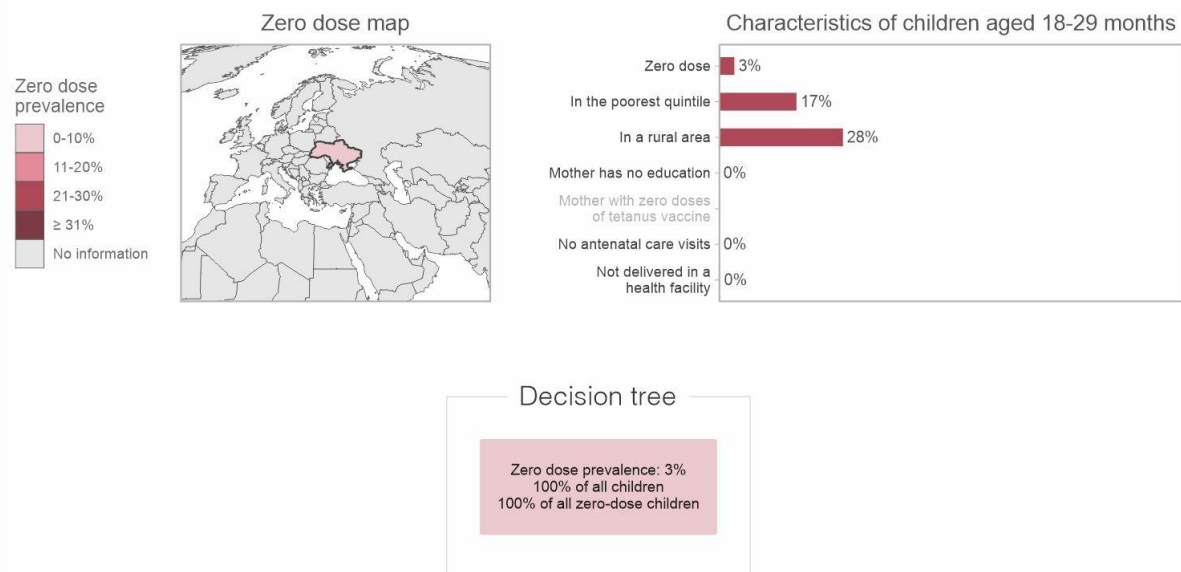

**Figure S88.** – Ukraine’s country profile.

## Vietnam, 2013

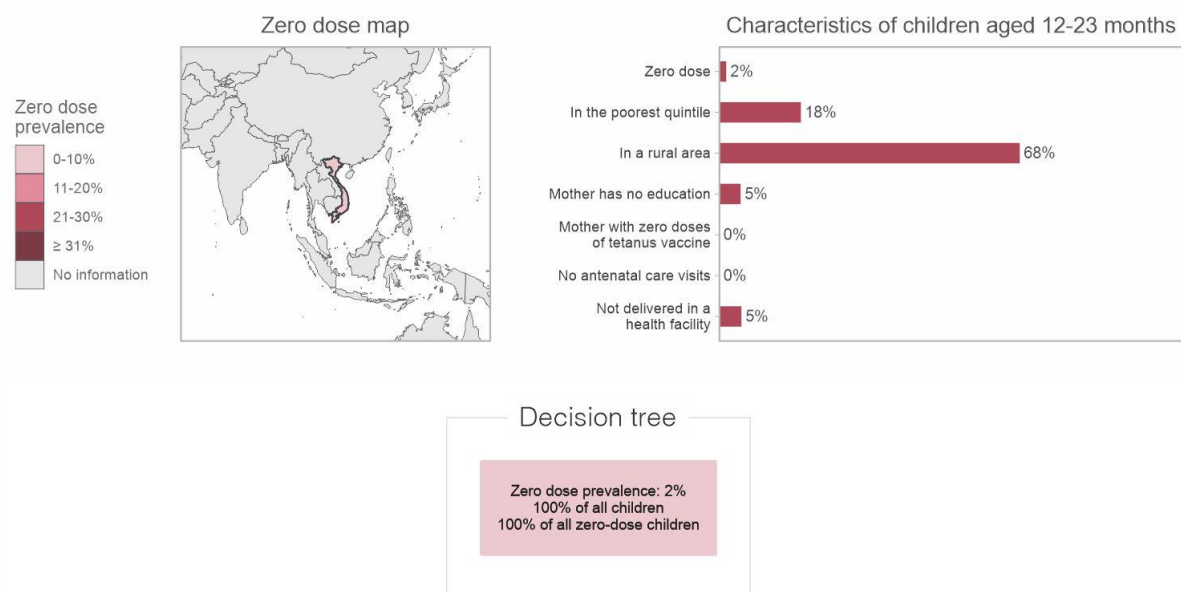

**Figure S89.** – Vietnam’s country profile.

## Yemen, 2013

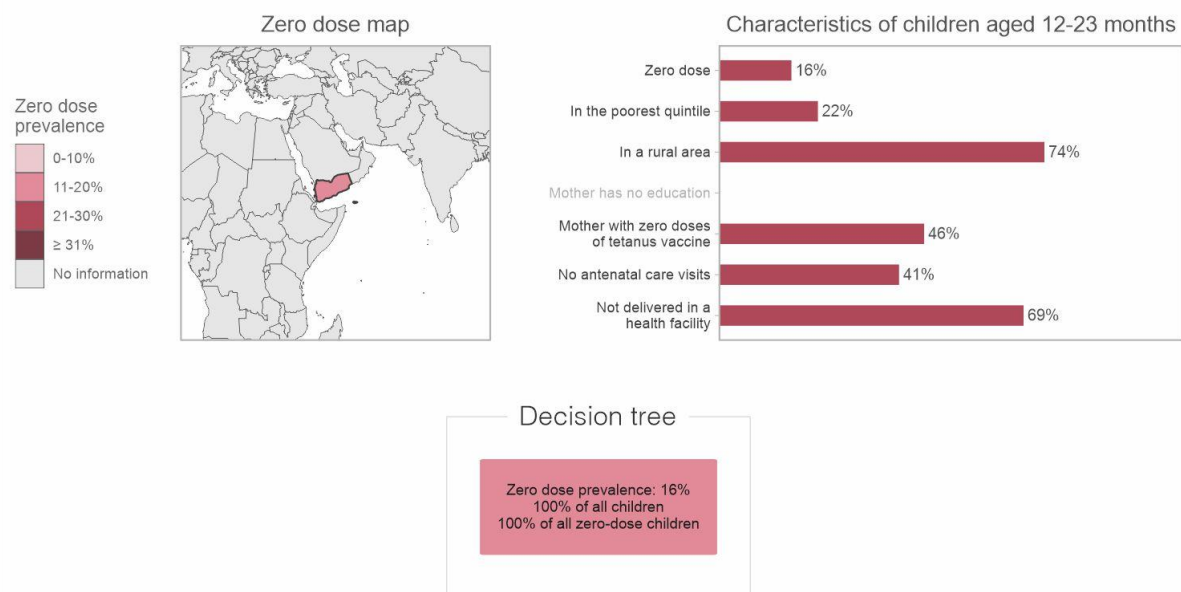

Figure S90. – Yemen's country profile.

## Zambia, 2018

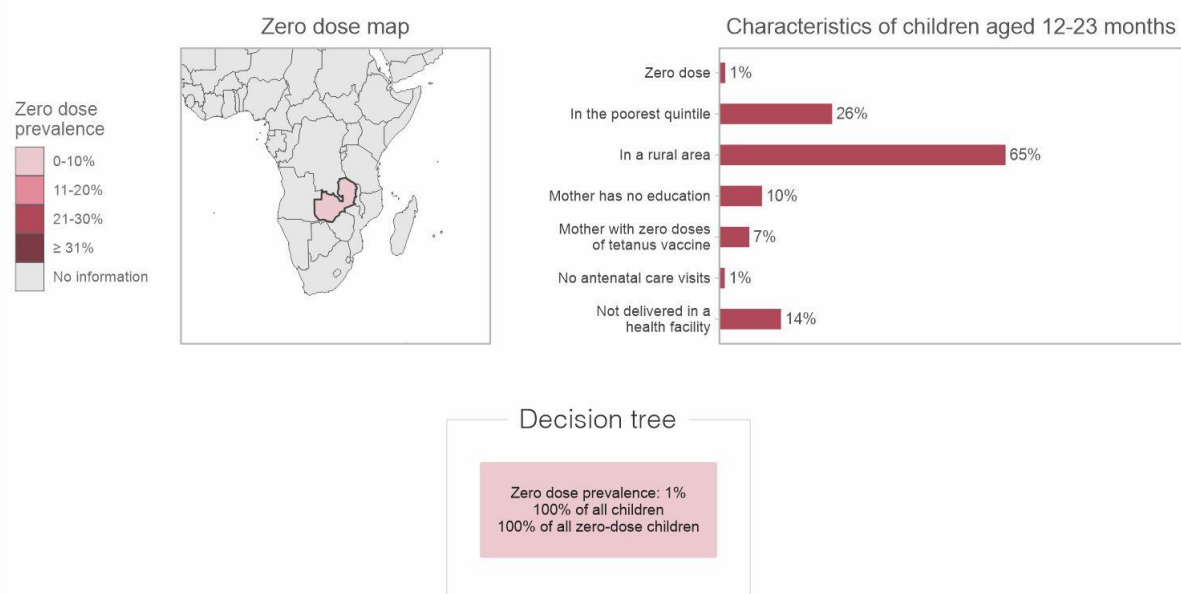

Figure S91. – Zambia's country profile.

## Zimbabwe, 2019

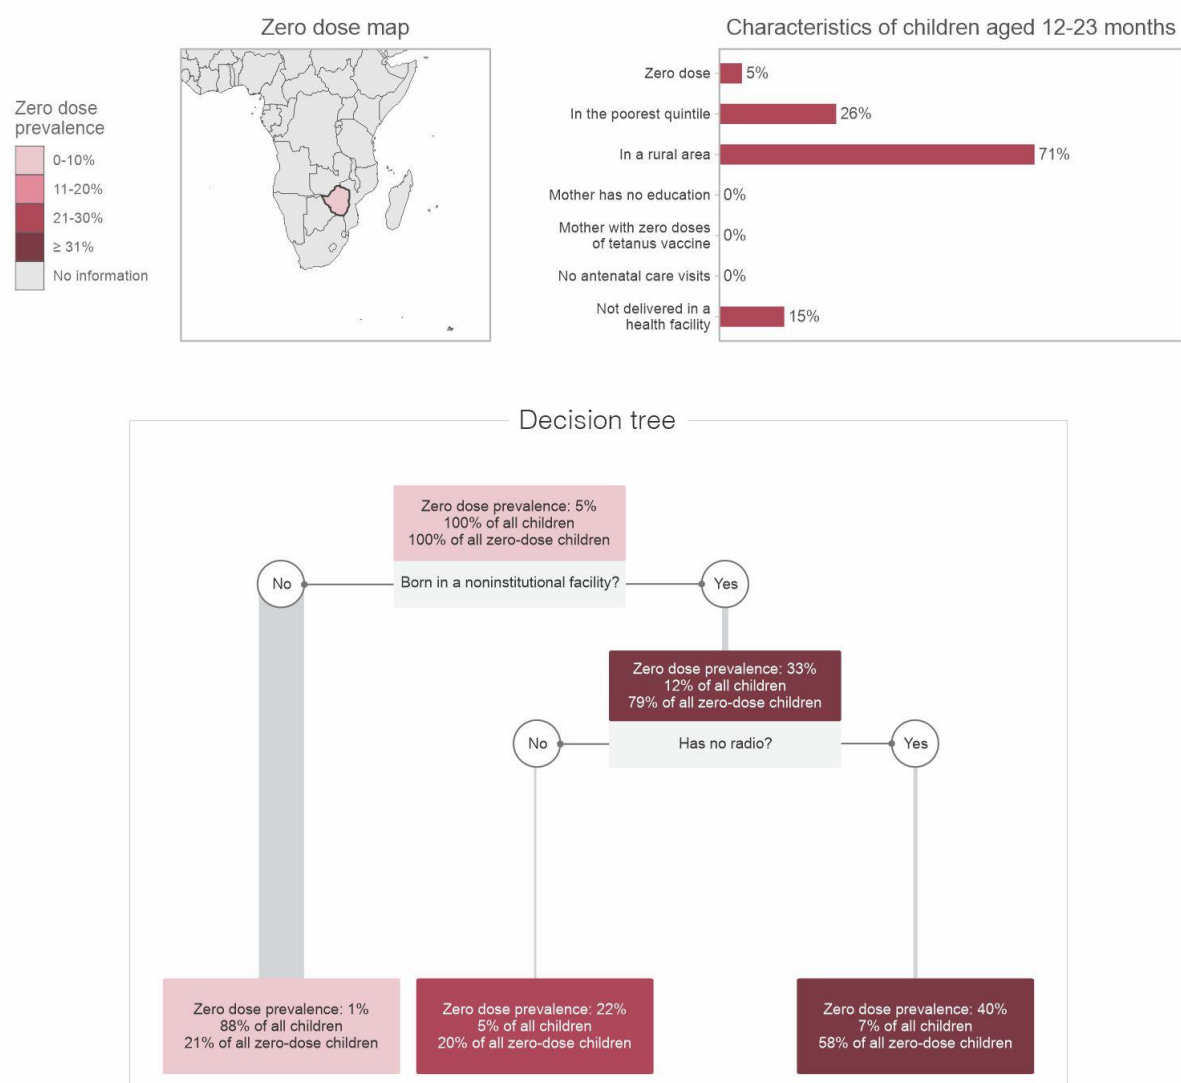

**Figure S92.** – Zimbabwe’s country profile.
